# Supplementary material for: Transcriptome Analysis of Chilling-Imbibed Embryo Revealed Membrane Recovery Related Genes in Maize
Source: Front Plant Sci. 2017 Jan 4;7:1978. doi: 10.3389/fpls.2016.01978 (PMC5209358; doi:10.3389/fpls.2016.01978)
Supplement: Supplementary file 2 [file DataSheet2.xlsx]

## Sheet: Sheet1
geneID	geneLength	CK2-Expression	CK3-Expression	CK2-FPKM	CK3-FPKM	log2 Ratio(CK3/CK2)	Up-Down-Regulation(CK3/CK2)	P-value	FDR	Description	KEGG Orthology	GO Component	GO Function	GO Process	Blast nr
GRMZM5G834605	506	0	29.3	0.01	7.36	9.52356	Up	1.96262e-07	4.18037e-06	-	-	-	-	-	gi|414876863|tpg|DAA53994.1|/4.04689e-64/TPA: hypothetical protein ZEAMMB73_259098 [Zea mays]
GRMZM2G147041	1209	0	72.87	0.01	7.34	9.51964	Up	1.76912e-17	1.40261e-15	-	-	GO:0043231//intracellular membrane-bounded organelle	-	-	gi|413923698|gb|AFW63630.1|/2.39865e-141/sucrose cleavage protein-like protein [Zea mays]
GRMZM5G856720	509	0	22.51	0.01	5.62	9.13443	Up	8.47384e-06	0.000125642	-	K01190|1|1e-33|140|ota:Ot07g03490|beta-galactosidase [EC:3.2.1.23]	-	GO:0016701//oxidoreductase activity, acting on single donors with incorporation of molecular oxygen	-	gi|414872367|tpg|DAA50924.1|/1.46655e-98/TPA: hypothetical protein ZEAMMB73_050535 [Zea mays]
GRMZM2G066047	921	0	40.07	0.01	5.35	9.0634	Up	5.28644e-10	1.72441e-08	-	-	-	-	-	gi|226503001|ref|NP_001145676.1|/1.22102e-40/uncharacterized protein LOC100279180 [Zea mays]
GRMZM2G181276	980.77	0	33.81	0.01	4.23	8.72451	Up	2.2825e-08	5.80117e-07	-	K10523|1|7e-27|118|sbi:SORBI_06g000720|speckle-type POZ protein	-	-	-	gi|414872177|tpg|DAA50734.1|/2.12192e-102/TPA: speckle-type POZ protein [Zea mays]
GRMZM5G816561	1734	0	52.37	0.01	3.64	8.50779	Up	8.31546e-13	3.94908e-11	-	K15398|1|2e-86|318|ppp:PHYPADRAFT_151187|cytochrome P450, family 86, subfamily A, polypeptide 2/4/7/8 (fatty acid omega-hydroxylase) [EC:1.14.-.-];K15402|2|3e-84|311|mtr:MTR_4g075110|cytochrome P450, family 86, subfamily B, polypeptide 1 (fatty acid omega-hydroxylase) [EC:1.14.-.-]	-	GO:0016491//oxidoreductase activity;GO:0005506//iron ion binding	GO:0008152//metabolic process	gi|414585819|tpg|DAA36390.1|/0/TPA: putative cytochrome P450 superfamily protein [Zea mays]
GRMZM2G070113	1826	0	54.24	0.01	3.58	8.48382	Up	2.83578e-13	1.44019e-11	-	K14948|1|3e-134|476|sbi:SORBI_09g021560|olypyrimidine tract-binding protein 2	GO:0043231//intracellular membrane-bounded organelle;GO:0043231//intracellular membrane-bounded organelle;GO:0043231//intracellular membrane-bounded organelle;GO:0043231//intracellular membrane-bounded organelle;GO:0030529//ribonucleoprotein complex	GO:0003676//nucleic acid binding;GO:0003676//nucleic acid binding;GO:0003676//nucleic acid binding;GO:0003676//nucleic acid binding	GO:0006396//RNA processing;GO:0006396//RNA processing;GO:0006396//RNA processing;GO:0010468//regulation of gene expression;GO:0006412//translation;GO:0006396//RNA processing	gi|413945516|gb|AFW78165.1|/0/hypothetical protein ZEAMMB73_011466 [Zea mays]
GRMZM2G003625	4523	0	108.97	0.01	2.87	8.16491	Up	6.8853e-26	9.40288e-24	-	K03013|1|6e-94|344|vvi:100258335|DNA-directed RNA polymerases I, II, and III subunit RPABC1;K13457|2|2e-48|193|sbi:SORBI_10g028720|disease resistance protein RPM1	-	GO:0032559;GO:0032559	GO:0012501//programmed cell death;GO:0006950//response to stress;GO:0012501//programmed cell death;GO:0006950//response to stress	gi|413915994|gb|AFW55926.1|/0/hypothetical protein ZEAMMB73_963178 [Zea mays]
GRMZM2G128648	817	0	18.4	0.01	2.78	8.11894	Up	7.2863e-05	0.000824606	-	K06127|1|2e-146|517|zma:100383639|ubiquinone biosynthesis methyltransferase [EC:2.1.1.201]	GO:0043231//intracellular membrane-bounded organelle;GO:0043231//intracellular membrane-bounded organelle;GO:0043231//intracellular membrane-bounded organelle	GO:0016741;GO:0016741;GO:0016741	GO:0006730//one-carbon metabolic process;GO:0006730//one-carbon metabolic process;GO:0006730//one-carbon metabolic process	gi|413916798|gb|AFW56730.1|/6.21425e-83/hypothetical protein ZEAMMB73_189189 [Zea mays]
GRMZM2G134415	1164	0	20.67	0.01	2.16	7.75489	Up	2.48482e-05	0.000325329	-	K00963|1|9e-59|225|bdi:100829721|UTP--glucose-1-phosphate uridylyltransferase [EC:2.7.7.9]	-	GO:0016772//transferase activity, transferring phosphorus-containing groups	-	gi|413933474|gb|AFW68025.1|/0/putative ribosomal protein S4 (RPS4A) family protein [Zea mays]
GRMZM2G134402	1202	0	20.66	0.01	2.09	7.70736	Up	2.48482e-05	0.000325478	-	K05756|1|3e-83|306|zma:100216873|actin related protein 2/3 complex, subunit 3	GO:0015629//actin cytoskeleton	-	GO:0008064//regulation of actin polymerization or depolymerization	gi|413936619|gb|AFW71170.1|/3.36485e-87/hypothetical protein ZEAMMB73_310296 [Zea mays]
GRMZM2G163683	1411.46	0	21.86	0.01	1.88	7.55459	Up	1.45107e-05	0.000202327	-	K15746|1|7e-44|119|zma:732775|beta-carotene 3-hydroxylase [EC:1.14.13.129]	GO:0016020//membrane;GO:0016020//membrane	-	GO:0008152//metabolic process;GO:0008152//metabolic process	gi|226530005|ref|NP_001141074.1|/5.33831e-96/uncharacterized protein LOC100273156 [Zea mays]
GRMZM5G872392	1617.87	0	23.99	0.01	1.79	7.48382	Up	4.9485e-06	7.68027e-05	-	K15382|1|2e-95|348|sbi:SORBI_04g021000|solute carrier family 50 (sugar transporter)	GO:0031224//intrinsic to membrane;GO:0031410//cytoplasmic vesicle;GO:0044464//cell part;GO:0031224//intrinsic to membrane;GO:0031410//cytoplasmic vesicle	-	GO:0071702;GO:0071702	gi|226491165|ref|NP_001146609.1|/1.69442e-126/uncharacterized protein LOC100280206 [Zea mays]
GRMZM2G026546	1570	0	22.65	0.01	1.74	7.44294	Up	8.47384e-06	0.000125707	-	-	-	-	-	gi|414884846|tpg|DAA60860.1|/1.71299e-84/TPA: hypothetical protein ZEAMMB73_372365 [Zea mays]
GRMZM2G378515	2327	0	29.99	0.01	1.55	7.27612	Up	1.96262e-07	4.18349e-06	-	K06630|1|3e-82|305|zma:100273134|tyrosine 3-monooxygenase/tryptophan 5-monooxygenase activation protein;K11657|3|1e-79|296|zma:542440|remodeling and spacing factor 1	-	GO:0005515//protein binding;GO:0005515//protein binding	-	gi|414592139|tpg|DAA42710.1|/0/TPA: hypothetical protein ZEAMMB73_365484 [Zea mays]
GRMZM2G487136	2286	0	19.2	0.01	1.01	6.65821	Up	4.255e-05	0.000521005	-	K00895|1|4e-32|138|zma:100193340|pyrophosphate--fructose-6-phosphate 1-phosphotransferase [EC:2.7.1.90]	GO:0043231//intracellular membrane-bounded organelle;GO:0044444//cytoplasmic part	-	-	gi|413950693|gb|AFW83342.1|/0/hypothetical protein ZEAMMB73_747373 [Zea mays]
GRMZM2G050867	2236	0	18.88	0.01	1.01	6.65821	Up	7.2863e-05	0.000824279	-	K14297|1|3e-103|285|ppp:PHYPADRAFT_144605|nuclear pore complex protein Nup98-Nup96	GO:0005635//nuclear envelope;GO:0005635//nuclear envelope	-	GO:0051234//establishment of localization;GO:0051234//establishment of localization	gi|413954619|gb|AFW87268.1|/0/hypothetical protein ZEAMMB73_096591 [Zea mays]
GRMZM2G314427	2515	0	19.56	0.01	0.93	6.53916	Up	4.255e-05	0.000521228	cob	K00412|1|0.0|696|sbi:SobioMp18|ubiquinol-cytochrome c reductase cytochrome b subunit	GO:0005618//cell wall;GO:0005746//mitochondrial respiratory chain;GO:0009986//cell surface;GO:0031225//anchored to membrane	GO:0043169//cation binding;GO:0015078//hydrogen ion transmembrane transporter activity;GO:0003824//catalytic activity	GO:0022900//electron transport chain;GO:0016049//cell growth;GO:0045333//cellular respiration;GO:0006970//response to osmotic stress;GO:0051234//establishment of localization;GO:0030198//extracellular matrix organization	gi|89280714|ref|YP_514668.1|/0/apocytochrome b [Oryza sativa Indica Group]
AC225308.2_FG005	3084	0	21	0.01	0.81	6.33985	Up	1.45107e-05	0.000202228	-	-	-	GO:0003676//nucleic acid binding	-	gi|414887172|tpg|DAA63186.1|/0/TPA: putative homeodomain-like transcription factor superfamily protein [Zea mays]
GRMZM2G058591	645	0.74	38.41	0.2	7.45	5.21917	Up	1.55016e-09	4.77289e-08	-	-	-	GO:0034062//RNA polymerase activity	-	gi|414588065|tpg|DAA38636.1|/2.32391e-123/TPA: hypothetical protein ZEAMMB73_143695 [Zea mays]
GRMZM2G004320	1279.02	1	31	0.1	2.95	4.88264	Up	9.57962e-07	1.75158e-05	-	-	GO:0031224//intrinsic to membrane;GO:0031410//cytoplasmic vesicle;GO:0031224//intrinsic to membrane;GO:0031410//cytoplasmic vesicle;GO:0031224//intrinsic to membrane;GO:0031410//cytoplasmic vesicle	GO:0003880//protein C-terminal carboxyl O-methyltransferase activity;GO:0003880//protein C-terminal carboxyl O-methyltransferase activity;GO:0003880//protein C-terminal carboxyl O-methyltransferase activity	GO:0006479//protein methylation;GO:0006479//protein methylation;GO:0006479//protein methylation	gi|414879113|tpg|DAA56244.1|/2.23378e-106/TPA: protein-S-isoprenylcysteine O-methyltransferase isoform 1 [Zea mays]
AC225718.2_FG009	312	1	25	0.6	10.7	4.1565	Up	1.99414e-05	0.000267341	-	-	-	-	-	gi|413934580|gb|AFW69131.1|/3.77832e-13/hypothetical protein ZEAMMB73_846123 [Zea mays]
AC217358.3_FG008	705	1	22	0.25	3.88	3.95606	Up	8.95568e-05	0.000986923	-	K07976|1|3e-70|263|ath:AT1G09630|Rab family, other;K07904|2|3e-70|262|aly:ARALYDRAFT_888208|Ras-related protein Rab-11A;K07905|5|5e-68|255|zma:100274335|Ras-related protein Rab-11B	GO:0043231//intracellular membrane-bounded organelle;GO:0044444//cytoplasmic part;GO:0016020//membrane	GO:0032561//guanyl ribonucleotide binding	GO:0035556//intracellular signal transduction;GO:0006810//transport	gi|414873860|tpg|DAA52417.1|/3.76267e-112/TPA: hypothetical protein ZEAMMB73_173009 [Zea mays]
GRMZM2G050384	755	4	84	0.92	13.8	3.90689	Up	2.17488e-15	1.39495e-13	-	-	-	-	-	gi|308080157|ref|NP_001183448.1|/1.06902e-30/uncharacterized protein LOC100501879 [Zea mays]
GRMZM2G106303	1588	1.77	35.71	0.19	2.72	3.83954	Up	1.24363e-07	2.75587e-06	opr1	K05894|1|0.0|718|zma:732815|12-oxophytodienoic acid reductase [EC:1.3.1.42]	-	GO:0003824//catalytic activity;GO:0000166//nucleotide binding	GO:0006950//response to stress;GO:0009694//jasmonic acid metabolic process	gi|413952673|gb|AFW85322.1|/0/12-oxo-phytodienoic acid reductase [Zea mays]
GRMZM2G028556	931	2	40	0.37	5.28	3.83494	Up	8.83244e-08	2.01838e-06	gst7	K00799|1|7e-95|192|sbi:SORBI_03g045800|glutathione S-transferase [EC:2.5.1.18]	-	GO:0016765//transferase activity, transferring alkyl or aryl (other than methyl) groups;GO:0016765//transferase activity, transferring alkyl or aryl (other than methyl) groups;GO:0016765//transferase activity, transferring alkyl or aryl (other than methyl) groups	-	gi|414878694|tpg|DAA55825.1|/3.88305e-135/TPA: hypothetical protein ZEAMMB73_212158, partial [Zea mays]
GRMZM2G106413	714	4	74.05	0.98	12.9	3.71845	Up	2.92742e-13	1.48146e-11	umc2403	-	-	-	-	gi|195606962|gb|ACG25311.1|/9.94167e-44/wound induced protein [Zea mays]
GRMZM2G300965	3069	8	147	0.44	5.72	3.70044	Up	3.75094e-25	4.9795e-23	-	K13447|1|0.0|1063|sbi:SORBI_03g014430|respiratory burst oxidase [EC:1.6.3.- 1.11.1.-]	GO:0031224//intrinsic to membrane	GO:0046914//transition metal ion binding;GO:0016651//oxidoreductase activity, acting on NAD(P)H;GO:0016209//antioxidant activity;GO:0050662//coenzyme binding	GO:0008152//metabolic process	gi|413916577|gb|AFW56509.1|/0/hypothetical protein ZEAMMB73_659141 [Zea mays]
GRMZM2G137321	1896	3	53	0.27	3.37	3.64172	Up	1.10545e-09	3.4941e-08	-	K08900|1|2e-138|491|sbi:SORBI_01g034560|mitochondrial chaperone BCS1	-	GO:0032559;GO:0016462//pyrophosphatase activity	-	gi|414873436|tpg|DAA51993.1|/0/TPA: hypothetical protein ZEAMMB73_582289 [Zea mays]
GRMZM2G701180	960.51	1.58	26	0.29	3.32	3.51706	Up	1.20553e-05	0.000171355	-	K15208|1|7e-16|82.0|smo:SELMODRAFT_414902|snRNA-activating protein complex subunit 1	-	-	-	gi|413945445|gb|AFW78094.1|/3.91128e-119/hypothetical protein ZEAMMB73_880469, partial [Zea mays]
GRMZM2G439668	237	2	30.96	1.65	18.19	3.46261	Up	1.14317e-05	0.000163469	-	-	-	-	-	gi|413918117|gb|AFW58049.1|/7.92237e-19/hypothetical protein ZEAMMB73_836335 [Zea mays]
GRMZM2G106393	771	32.25	474.61	7.28	76.26	3.38892	Up	7.92176e-73	3.32504e-70	-	-	-	-	-	gi|226494895|ref|NP_001146921.1|/5.1727e-44/LOC100280530 [Zea mays]
GRMZM2G060544	1295	20.02	294.11	2.64	27.59	3.38554	Up	1.33384e-45	3.33951e-43	-	-	-	-	-	gi|226509126|ref|NP_001142806.1|/3.01444e-121/uncharacterized protein LOC100275184 [Zea mays]
AC190933.3_FG004	489	3	44	1.1	11.47	3.38229	Up	8.4008e-08	1.93056e-06	-	-	-	-	-	gi|414876302|tpg|DAA53433.1|/1.06638e-63/TPA: hypothetical protein ZEAMMB73_383574 [Zea mays]
GRMZM2G038028	1688	0.6	21.85	0.15	1.56	3.37851	Up	1.45107e-05	0.000202426	-	K05016|1|3e-06|50.1|ota:Ot09g03790|chloride channel 7	GO:0031224//intrinsic to membrane;GO:0044424//intracellular part;GO:0031224//intrinsic to membrane;GO:0009536//plastid	GO:0008135//translation factor activity, nucleic acid binding;GO:0005254//chloride channel activity;GO:0005254//chloride channel activity	GO:0015698//inorganic anion transport;GO:0006412//translation;GO:0015698//inorganic anion transport	gi|413922977|gb|AFW62909.1|/1.89892e-97/putative eukaryotic translation initiation factor 3E subunit family protein, partial [Zea mays]
GRMZM2G010149	699	2.45	34.66	0.61	6.17	3.33839	Up	1.66081e-06	2.87988e-05	-	K14525|1|3e-33|139|pop:POPTR_559398|ribonucleases P/MRP protein subunit RPP25 [EC:3.1.26.5]	-	-	-	gi|223973867|gb|ACN31121.1|/1.23384e-67/unknown [Zea mays]
GRMZM2G012233	1298	2	28.03	0.26	2.62	3.33298	Up	2.96938e-05	0.000380225	-	K01904|1|3e-48|108|sbi:SORBI_03g000610|4-coumarate--CoA ligase [EC:6.2.1.12]	GO:0044424//intracellular part;GO:0044424//intracellular part	GO:0016491//oxidoreductase activity;GO:0015645//fatty acid ligase activity;GO:0016405//CoA-ligase activity;GO:0015645//fatty acid ligase activity;GO:0016405//CoA-ligase activity	GO:0010584//pollen exine formation;GO:0035337;GO:0010584//pollen exine formation;GO:0035337	gi|226508036|ref|NP_001146477.1|/7.88705e-51/uncharacterized protein LOC100280065 [Zea mays]
GRMZM2G026780	1001	32	431	5.5	52.75	3.26167	Up	4.73732e-64	1.73349e-61	-	-	-	-	-	gi|226507749|ref|NP_001142527.1|/1.34611e-35/uncharacterized protein LOC100274767 [Zea mays]
GRMZM2G132093	1092	13	176	2.1	19.68	3.22827	Up	4.95392e-27	7.14115e-25	gst2	K00799|1|2e-42|171|bdi:100837677|glutathione S-transferase [EC:2.5.1.18]	-	GO:0016765//transferase activity, transferring alkyl or aryl (other than methyl) groups;GO:0016765//transferase activity, transferring alkyl or aryl (other than methyl) groups;GO:0016765//transferase activity, transferring alkyl or aryl (other than methyl) groups	-	gi|162460024|ref|NP_001105366.1|/3.7386e-125/glutathione S-transferase 4 [Zea mays]
GRMZM2G069146	825	3	38	0.63	5.69	3.175	Up	1.42583e-06	2.51056e-05	-	K09286|1|3e-17|87.0|ath:AT4G25480|EREBP-like factor	GO:0043231//intracellular membrane-bounded organelle	-	-	gi|414886339|tpg|DAA62353.1|/1.06925e-98/TPA: putative AP2/EREBP transcription factor superfamily protein [Zea mays]
GRMZM2G300990	1471.33	1.34	36.8	0.34	3.03	3.15571	Up	7.45156e-08	1.73194e-06	-	-	GO:0009536//plastid;GO:0009536//plastid	GO:0016829//lyase activity;GO:0004672//protein kinase activity;GO:0032559;GO:0004672//protein kinase activity;GO:0032559;GO:0016829//lyase activity;GO:0004672//protein kinase activity;GO:0032559	GO:0006396//RNA processing;GO:0006779//porphyrin-containing compound biosynthetic process;GO:0006464//cellular protein modification process;GO:0006464//cellular protein modification process;GO:0006396//RNA processing;GO:0006779//porphyrin-containing compound biosynthetic process;GO:0006464//cellular protein modification process	gi|414872991|tpg|DAA51548.1|/1.03126e-115/TPA: putative protein kinase superfamily protein [Zea mays]
GRMZM2G396246	1886	1.98	24.27	0.18	1.55	3.1062	Up	3.29456e-05	0.00041774	-	-	-	-	-	gi|224029325|gb|ACN33738.1|/4.84072e-36/unknown [Zea mays]
GRMZM2G044576	1748	3	36	0.29	2.48	3.09622	Up	3.61882e-06	5.77352e-05	-	-	-	-	-	gi|413952458|gb|AFW85107.1|/3.39093e-145/putative GATA transcription factor family protein [Zea mays]
GRMZM2G051522	1453	6.05	70.15	0.71	5.85	3.04255	Up	7.20036e-11	2.69702e-09	-	-	-	-	-	gi|413947946|gb|AFW80595.1|/5.47679e-90/hypothetical protein ZEAMMB73_105834 [Zea mays]
GRMZM2G082745	2150.53	3	29	0.2	1.62	3.01792	Up	8.85348e-05	0.000977926	-	-	GO:0043231//intracellular membrane-bounded organelle;GO:0043231//intracellular membrane-bounded organelle;GO:0043231//intracellular membrane-bounded organelle;GO:0043231//intracellular membrane-bounded organelle	GO:0003676//nucleic acid binding;GO:0003676//nucleic acid binding;GO:0003676//nucleic acid binding;GO:0003676//nucleic acid binding	-	gi|219885145|gb|ACL52947.1|/7.29485e-77/unknown [Zea mays]
GRMZM2G096231	883	3	34.09	0.59	4.75	3.00914	Up	9.11818e-06	0.000133668	-	-	GO:0043231//intracellular membrane-bounded organelle	GO:0008194//UDP-glycosyltransferase activity	-	gi|414866123|tpg|DAA44680.1|/1.46033e-88/TPA: hypothetical protein ZEAMMB73_672588 [Zea mays]
GRMZM2G330772	1178	2.74	30.64	0.4	3.17	2.98641	Up	1.14317e-05	0.000163551	-	K08486|1|1e-132|419|osa:4342474|syntaxin 1B/2/3	GO:0016020//membrane;GO:0016020//membrane	GO:0005515//protein binding;GO:0005515//protein binding	GO:0009725//response to hormone stimulus;GO:0016044//cellular membrane organization;GO:0015031//protein transport;GO:0009725//response to hormone stimulus;GO:0016044//cellular membrane organization;GO:0015031//protein transport	gi|414592021|tpg|DAA42592.1|/0/TPA: hypothetical protein ZEAMMB73_464346 [Zea mays]
AC214635.3_FG006	258	8	85	5.98	45.22	2.91874	Up	1.85858e-12	8.39362e-11	-	-	-	-	-	gi|413922782|gb|AFW62714.1|/2.49279e-17/hypothetical protein ZEAMMB73_058067 [Zea mays]
GRMZM2G351307	1540.9	7.27	57.07	0.61	4.48	2.87662	Up	1.01162e-07	2.2825e-06	-	K07466|1|5e-20|97.4|bdi:100845662|replication factor A1	-	-	-	gi|414877599|tpg|DAA54730.1|/0/TPA: hypothetical protein ZEAMMB73_628014 [Zea mays]
GRMZM5G860399	344.16	3.71	31.79	1.7	12.18	2.84091	Up	3.5913e-05	0.000450562	-	-	-	-	-	gi|413942516|gb|AFW75165.1|/4.36044e-25/hypothetical protein ZEAMMB73_121255 [Zea mays]
GRMZM2G025062	1112	3.03	30.35	0.47	3.33	2.82479	Up	5.64578e-05	0.000663681	-	K09286|1|7e-18|89.7|ath:AT3G16770|EREBP-like factor	-	-	-	gi|414888087|tpg|DAA64101.1|/1.72271e-66/TPA: putative AP2/EREBP transcription factor superfamily protein [Zea mays]
GRMZM2G700791	577	5	47	1.53	10.26	2.74543	Up	5.08256e-07	9.84837e-06	-	-	-	-	-	gi|413951911|gb|AFW84560.1|/3.63621e-47/hypothetical protein ZEAMMB73_284819 [Zea mays]
AC149829.2_FG002	255	10	92.38	7.58	49.82	2.71646	Up	1.61594e-12	7.36774e-11	-	-	-	-	-	gi|195624792|gb|ACG34226.1|/5.9522e-19/hypothetical protein [Zea mays]
GRMZM2G008468	1137.98	3	30	0.49	3.21	2.71172	Up	5.64578e-05	0.000663955	-	-	GO:0031410//cytoplasmic vesicle;GO:0031410//cytoplasmic vesicle;GO:0031410//cytoplasmic vesicle	-	GO:0006810//transport;GO:0006810//transport;GO:0006810//transport	gi|226510454|ref|NP_001148539.1|/5.98099e-60/golgi transport 1 protein B [Zea mays]
GRMZM2G106511	975	8.02	73.97	1.42	9.3	2.71134	Up	3.8706e-10	1.29665e-08	-	-	-	-	-	-
GRMZM2G146948	843.65	5.57	35.92	0.81	5.25	2.69632	Up	8.87592e-05	0.000980025	-	K06268|1|2e-72|270|zma:100193443|protein phosphatase 3, regulatory subunit	-	GO:0046872//metal ion binding;GO:0046872//metal ion binding	-	gi|414870335|tpg|DAA48892.1|/3.34964e-85/TPA: hypothetical protein ZEAMMB73_928469 [Zea mays]
GRMZM2G166603	3448	5.36	47.93	0.26	1.66	2.6746	Up	5.08256e-07	9.84168e-06	-	K01376|1|4e-95|348|ath:AT1G47128|[EC:3.4.22.-];K01365|4|4e-80|298|smo:SELMODRAFT_428615|cathepsin L [EC:3.4.22.15]	-	-	-	gi|414875906|tpg|DAA53037.1|/0/TPA: hypothetical protein ZEAMMB73_586844 [Zea mays]
GRMZM2G400704	1011	3.6	31.99	0.61	3.88	2.66918	Up	3.5913e-05	0.000450364	-	K01011|1|2e-30|131|sbi:SORBI_08g020860|thiosulfate/3-mercaptopyruvate sulfurtransferase [EC:2.8.1.1 2.8.1.2]	-	-	-	gi|414588073|tpg|DAA38644.1|/0/TPA: hypothetical protein ZEAMMB73_739939 [Zea mays]
GRMZM2G035465	1385.7	10.13	70.86	1	6.2	2.63227	Up	1.86843e-08	4.85247e-07	-	-	GO:0043231//intracellular membrane-bounded organelle;GO:0043231//intracellular membrane-bounded organelle;GO:0043231//intracellular membrane-bounded organelle;GO:0043231//intracellular membrane-bounded organelle;GO:0043231//intracellular membrane-bounded organelle	GO:0005515//protein binding;GO:0005515//protein binding;GO:0005515//protein binding;GO:0005515//protein binding;GO:0005515//protein binding	GO:0009755//hormone-mediated signaling pathway;GO:0006412//translation;GO:0009755//hormone-mediated signaling pathway;GO:0006412//translation;GO:0009755//hormone-mediated signaling pathway;GO:0006412//translation;GO:0009755//hormone-mediated signaling pathway;GO:0006412//translation;GO:0009755//hormone-mediated signaling pathway;GO:0006412//translation	gi|413949412|gb|AFW82061.1|/2.64597e-102/hypothetical protein ZEAMMB73_977844 [Zea mays]
GRMZM2G140041	1572.15	21.75	174.92	2.35	13.45	2.51687	Up	2.79716e-21	2.92442e-19	-	-	-	-	-	gi|414589399|tpg|DAA39970.1|/1.93366e-164/TPA: hypothetical protein ZEAMMB73_838535 [Zea mays]
GRMZM2G032562	838	6	48	1.24	7.07	2.51137	Up	1.28353e-06	2.2712e-05	-	K03094|1|2e-49|194|bdi:100826905|S-phase kinase-associated protein 1	-	-	GO:0019941//modification-dependent protein catabolic process	gi|414888311|tpg|DAA64325.1|/4.32609e-87/TPA: SKP1-like protein 1A [Zea mays]
GRMZM2G099420	1413	6	47	0.72	4.03	2.48471	Up	1.96561e-06	3.3514e-05	-	K09753|1|4e-96|350|rcu:RCOM_0470860|cinnamoyl-CoA reductase [EC:1.2.1.44]	-	GO:0048037//cofactor binding	GO:0008152//metabolic process	gi|413924104|gb|AFW64036.1|/3.24246e-172/hypothetical protein ZEAMMB73_720380 [Zea mays]
GRMZM2G090163	1312	4.32	33.29	0.56	3.08	2.45943	Up	5.95884e-05	0.000695328	-	-	GO:0043231//intracellular membrane-bounded organelle;GO:0043231//intracellular membrane-bounded organelle	GO:0003676//nucleic acid binding;GO:0003676//nucleic acid binding	-	gi|414883658|tpg|DAA59672.1|/0/TPA: hypothetical protein ZEAMMB73_581852 [Zea mays]
GRMZM2G066153	3012	6.4	48.8	0.36	1.94	2.42999	Up	1.28353e-06	2.27261e-05	-	-	GO:0009536//plastid	GO:0003824//catalytic activity	-	gi|413945550|gb|AFW78199.1|/0/phosphoribosylanthranilate transferase [Zea mays]
GRMZM5G818655	1587	15.19	108.68	1.62	8.28	2.35364	Up	1.30949e-12	6.06744e-11	-	-	-	-	-	gi|414877294|tpg|DAA54425.1|/0/TPA: hypothetical protein ZEAMMB73_872770 [Zea mays]
GRMZM2G407146	487	113	810	41.58	212.1	2.35078	Up	3.71884e-85	1.92988e-82	-	-	-	-	-	-
GRMZM2G087628	1712	5	36	0.5	2.54	2.34483	Up	5.85158e-05	0.000685052	-	K02945|1|0.0|733|sbi:SORBI_03g026440|small subunit ribosomal protein S1	GO:0043231//intracellular membrane-bounded organelle;GO:0043231//intracellular membrane-bounded organelle	GO:0003676//nucleic acid binding;GO:0003676//nucleic acid binding	-	gi|418207172|gb|AFX62688.1|/0/plastid S1-binding domain protein precursor [Zea mays]
GRMZM2G305362	1902	82.81	588.32	7.36	37.23	2.33869	Up	2.75812e-62	9.60028e-60	-	-	-	-	GO:0006351//transcription, DNA-dependent	gi|413948013|gb|AFW80662.1|/2.50894e-157/hypothetical protein ZEAMMB73_350135 [Zea mays]
GRMZM2G000236	1660	12.23	85.29	1.25	6.2	2.31034	Up	4.37816e-10	1.45304e-08	opr2	K05894|1|0.0|700|zma:732815|12-oxophytodienoic acid reductase [EC:1.3.1.42]	-	GO:0003824//catalytic activity;GO:0000166//nucleotide binding	GO:0006950//response to stress;GO:0009694//jasmonic acid metabolic process	gi|413952670|gb|AFW85319.1|/0/12-oxophytodienoate reductase 2 [Zea mays]
GRMZM2G017474	1873	11	75.9	0.99	4.88	2.30138	Up	7.92646e-09	2.19648e-07	-	-	-	-	-	gi|413920224|gb|AFW60156.1|/2.21867e-46/plant viral-response family protein [Zea mays]
GRMZM2G074087	1021	9.73	67.89	1.67	8.14	2.28518	Up	1.90931e-08	4.94516e-07	-	K14489|1|5e-10|63.5|vvi:100263145|arabidopsis histidine kinase 2/3/4 (cytokinin receptor) [EC:2.7.13.3]	GO:0031410//cytoplasmic vesicle;GO:0031410//cytoplasmic vesicle	GO:0003824//catalytic activity;GO:0003824//catalytic activity	-	gi|226502528|ref|NP_001141170.1|/1.58462e-47/putative X8 domain containing family protein precursor [Zea mays]
GRMZM2G058702	3059	7.46	50.94	0.41	1.99	2.27907	Up	1.93454e-06	3.30237e-05	-	K00627|1|7e-143|506|zma:100274483|pyruvate dehydrogenase E2 component (dihydrolipoamide acetyltransferase) [EC:2.3.1.12]	GO:0043231//intracellular membrane-bounded organelle	GO:0016747//transferase activity, transferring acyl groups other than amino-acyl groups	-	gi|414870468|tpg|DAA49025.1|/0/TPA: hypothetical protein ZEAMMB73_066761 [Zea mays]
GRMZM2G032766	1593	8	54.01	0.85	4.1	2.27009	Up	1.22283e-06	2.18001e-05	-	-	-	-	-	gi|414884668|tpg|DAA60682.1|/5.67246e-136/TPA: hypothetical protein ZEAMMB73_781558 [Zea mays]
AC210204.3_FG002	1746	7	47	0.68	3.25	2.25683	Up	6.64276e-06	0.000100582	-	-	-	-	-	gi|195641696|gb|ACG40316.1|/3.01954e-77/SRC2 [Zea mays]
GRMZM2G168898	1044	10	67	1.65	7.85	2.25023	Up	6.34742e-08	1.4911e-06	-	-	-	GO:0005506//iron ion binding	GO:0015669//gas transport	gi|162461616|ref|NP_001105819.1|/1.98166e-77/hemoglobin 2 [Zea mays]
GRMZM2G171096	731	9	60	2.15	10.2	2.24616	Up	3.40358e-07	6.85568e-06	-	-	-	-	-	gi|195643042|gb|ACG40989.1|/5.96482e-23/hypothetical protein [Zea mays]
GRMZM2G168365	1474	8	53.01	0.92	4.35	2.24131	Up	1.83577e-06	3.15073e-05	-	K15382|1|8e-72|268|zma:100282648|solute carrier family 50 (sugar transporter)	GO:0031224//intrinsic to membrane;GO:0031410//cytoplasmic vesicle;GO:0031224//intrinsic to membrane;GO:0031410//cytoplasmic vesicle;GO:0031224//intrinsic to membrane;GO:0031410//cytoplasmic vesicle	-	GO:0071702;GO:0071702;GO:0071702	gi|413922504|gb|AFW62436.1|/9.93431e-77/hypothetical protein ZEAMMB73_320886 [Zea mays]
GRMZM2G091535	646.98	12.63	72.04	2.97	13.92	2.22862	Up	8.03866e-08	1.85631e-06	-	-	-	-	-	gi|226530343|ref|NP_001152643.1|/1.46472e-129/late embryogenesis abundant protein D-34 [Zea mays]
GRMZM2G436804	988	10.51	68.44	1.83	8.49	2.21392	Up	4.22952e-08	1.01873e-06	-	-	GO:0009536//plastid	-	-	gi|414880911|tpg|DAA58042.1|/3.79638e-56/TPA: hypothetical protein ZEAMMB73_985322, partial [Zea mays]
AC233922.1_FG004	231	10	65	8.51	39.37	2.20987	Up	1.42202e-07	3.12209e-06	-	K01885|1|1e-35|145|sbi:SORBI_04g001710|glutamyl-tRNA synthetase [EC:6.1.1.17]	GO:0009536//plastid	GO:0003676//nucleic acid binding;GO:0004812//aminoacyl-tRNA ligase activity;GO:0032559	GO:0009657//plastid organization;GO:0006418//tRNA aminoacylation for protein translation;GO:0003006//developmental process involved in reproduction	gi|413926628|gb|AFW66560.1|/2.23101e-37/hypothetical protein ZEAMMB73_133357, partial [Zea mays]
GRMZM2G079389	2863	6.1	39.68	0.36	1.66	2.20511	Up	5.47198e-05	0.000645644	-	-	-	-	-	gi|293337267|ref|NP_001169780.1|/0/uncharacterized protein LOC100383666 [Zea mays]
GRMZM2G304915	2008	5.25	43.65	0.57	2.61	2.19502	Up	2.94428e-06	4.81028e-05	-	K01930|1|0.0|1028|zma:100285263|folylpolyglutamate synthase [EC:6.3.2.17]	GO:0044429//mitochondrial part	GO:0016881//acid-amino acid ligase activity;GO:0032559;GO:0016881//acid-amino acid ligase activity;GO:0032559;GO:0016881//acid-amino acid ligase activity;GO:0032559;GO:0016881//acid-amino acid ligase activity;GO:0032559	GO:0006760//folic acid-containing compound metabolic process;GO:0006760//folic acid-containing compound metabolic process;GO:0006760//folic acid-containing compound metabolic process;GO:0006760//folic acid-containing compound metabolic process	gi|413916542|gb|AFW56474.1|/0/GLA1 [Zea mays]
GRMZM2G090177	1276	22	140	2.94	13.33	2.18079	Up	1.15047e-14	6.88403e-13	-	-	-	-	-	gi|226497460|ref|NP_001141178.1|/2.82389e-47/hypothetical protein [Zea mays]
GRMZM2G051842	1532	8.32	59.11	1.03	4.67	2.18078	Up	1.55555e-07	3.39438e-06	-	K00856|1|3e-12|71.6|aly:ARALYDRAFT_478305|adenosine kinase [EC:2.7.1.20]	-	GO:0016772//transferase activity, transferring phosphorus-containing groups;GO:0016772//transferase activity, transferring phosphorus-containing groups	GO:0006796//phosphate-containing compound metabolic process;GO:0006796//phosphate-containing compound metabolic process	gi|239052852|ref|NP_001131950.2|/1.62702e-104/uncharacterized protein LOC100193343 [Zea mays]
GRMZM2G060410	746.93	6	38	1.41	6.31	2.16194	Up	8.1954e-05	0.000913366	-	-	-	-	-	gi|414884991|tpg|DAA61005.1|/3.46776e-52/TPA: hypothetical protein ZEAMMB73_169678 [Zea mays]
GRMZM2G316362	1502	47	294	5.32	23.68	2.15417	Up	6.94132e-29	1.05946e-26	-	K03921|1|3e-98|356|zma:100273826|acyl-[acyl-carrier-protein] desaturase [EC:1.14.19.2]	GO:0009536//plastid;GO:0009536//plastid;GO:0009536//plastid	GO:0046872//metal ion binding;GO:0016717//oxidoreductase activity, acting on paired donors, with oxidation of a pair of donors resulting in the reduction of molecular oxygen to two molecules of water;GO:0046872//metal ion binding;GO:0016717//oxidoreductase activity, acting on paired donors, with oxidation of a pair of donors resulting in the reduction of molecular oxygen to two molecules of water…	GO:0006631//fatty acid metabolic process;GO:0006631//fatty acid metabolic process;GO:0006631//fatty acid metabolic process	gi|239052653|ref|NP_001141697.2|/0/uncharacterized protein LOC100273826 [Zea mays]
GRMZM2G129018	1617.48	22.83	140.61	2.39	10.5	2.13531	Up	1.15047e-14	6.86963e-13	-	K00924|1|8e-104|375|ath:AT1G30270|[EC:2.7.1.-];K07198|3|4e-64|244|vvi:100254223|5'-AMP-activated protein kinase, catalytic alpha subunit [EC:2.7.11.11]	-	GO:0004672//protein kinase activity;GO:0032559;GO:0004672//protein kinase activity;GO:0032559	GO:0006464//cellular protein modification process;GO:0023052//signaling;GO:0006464//cellular protein modification process;GO:0023052//signaling	gi|194705422|gb|ACF86795.1|/0/unknown [Zea mays]
GRMZM2G100505	1324	7	42	0.9	3.85	2.09686	Up	4.94184e-05	0.000592647	rop3	K04392|1|3e-26|116|zma:541774|Ras-related C3 botulinum toxin substrate 1	GO:0044464//cell part;GO:0044464//cell part;GO:0016020//membrane	GO:0032561//guanyl ribonucleotide binding;GO:0004620//phospholipase activity;GO:0032561//guanyl ribonucleotide binding;GO:0032561//guanyl ribonucleotide binding;GO:0004620//phospholipase activity	GO:0035556//intracellular signal transduction;GO:0035556//intracellular signal transduction;GO:0035556//intracellular signal transduction	gi|413944823|gb|AFW77472.1|/7.19544e-110/rop3 small GTP binding protein [Zea mays]
AC197047.3_FG001	558	27.86	167.45	8.86	37.88	2.09606	Up	7.15104e-17	5.41393e-15	-	-	GO:0043231//intracellular membrane-bounded organelle	-	-	gi|226499266|ref|NP_001144738.1|/4.58995e-52/uncharacterized protein LOC100277785 [Zea mays]
GRMZM2G115112	766	5.96	35.34	1.35	5.72	2.08306	Up	8.87592e-05	0.000979646	-	-	GO:0043231//intracellular membrane-bounded organelle	GO:0003677//DNA binding;GO:0001071//nucleic acid binding transcription factor activity	GO:0006351//transcription, DNA-dependent	gi|414591802|tpg|DAA42373.1|/9.40669e-91/TPA: putative homeodomain-like transcription factor superfamily protein [Zea mays]
GRMZM2G019006	873	8.62	50.9	1.71	7.18	2.06999	Up	6.12864e-06	9.34421e-05	-	-	-	-	-	gi|413934058|gb|AFW68609.1|/1.67329e-153/hypothetical protein ZEAMMB73_777129 [Zea mays]
GRMZM2G053503	965.79	38.78	205.84	6.32	26.14	2.04826	Up	3.26592e-18	2.70191e-16	-	K09286|1|1e-14|79.0|gmx:100170723|EREBP-like factor	-	-	-	gi|195645506|gb|ACG42221.1|/2.18012e-71/ethylene-responsive factor-like protein 1 [Zea mays]
AC209810.3_FG002	1107	15.06	86.09	2.33	9.49	2.02608	Up	8.36274e-09	2.30618e-07	-	K01365|1|0.0|645|sbi:SORBI_03g043220|cathepsin L [EC:3.4.22.15]	GO:0031410//cytoplasmic vesicle;GO:0005783//endoplasmic reticulum	GO:0004175//endopeptidase activity	GO:0019538//protein metabolic process	gi|414879123|tpg|DAA56254.1|/0/TPA: hypothetical protein ZEAMMB73_708930 [Zea mays]
GRMZM2G330049	2120	9.17	52.39	0.73	2.97	2.02449	Up	8.13344e-06	0.000121098	-	K00924|1|7e-95|346|ath:AT1G30270|[EC:2.7.1.-];K07198|3|3e-65|248|vvi:100254223|5'-AMP-activated protein kinase, catalytic alpha subunit [EC:2.7.11.11]	-	GO:0004672//protein kinase activity;GO:0032559	GO:0006464//cellular protein modification process;GO:0023052//signaling	gi|414589490|tpg|DAA40061.1|/0/TPA: putative CBL-interacting protein kinase family protein [Zea mays]
GRMZM5G822947	693	12	68	3.03	12.22	2.01185	Up	3.77474e-07	7.55001e-06	-	-	GO:0031224//intrinsic to membrane	-	-	gi|226510220|ref|NP_001143955.1|/4.08933e-47/uncharacterized protein LOC100276769 [Zea mays]
GRMZM2G386674	1326	129.11	724.61	16.61	66.34	1.99783	Up	9.1583e-63	3.22711e-60	-	-	-	-	-	gi|413946078|gb|AFW78727.1|/1.1101e-110/seed specific protein Bn15D17A [Zea mays]
GRMZM2G365770	1037	9	50	1.49	5.9	1.9854	Up	1.75671e-05	0.000239447	-	-	-	-	-	gi|413916144|gb|AFW56076.1|/1.97752e-53/hypothetical protein ZEAMMB73_748138 [Zea mays]
GRMZM2G104410	1878	10.87	58.64	0.98	3.76	1.93988	Up	2.25158e-06	3.78472e-05	-	-	GO:0031410//cytoplasmic vesicle;GO:0031410//cytoplasmic vesicle	-	-	gi|414887143|tpg|DAA63157.1|/0/TPA: hypothetical protein ZEAMMB73_938040 [Zea mays]
GRMZM2G042639	1031.56	25.96	136.62	4.24	16.21	1.93475	Up	1.25658e-12	5.86033e-11	-	K00799|1|2e-130|463|zma:542388|glutathione S-transferase [EC:2.5.1.18]	GO:0044424//intracellular part	GO:0016765//transferase activity, transferring alkyl or aryl (other than methyl) groups	-	gi|414866213|tpg|DAA44770.1|/2.7897e-131/TPA: hypothetical protein ZEAMMB73_079595 [Zea mays]
GRMZM2G156568	2049	9.99	52.99	0.82	3.11	1.92322	Up	8.13344e-06	0.000121035	-	-	-	-	-	gi|226506730|ref|NP_001146083.1|/0/hypothetical protein [Zea mays]
GRMZM2G169382	1126	22.12	117.14	3.37	12.69	1.91287	Up	7.7907e-11	2.90669e-09	-	K09286|1|4e-14|77.4|zma:100284306|EREBP-like factor	-	-	-	gi|408690236|gb|AFU81578.1|/2.4588e-60/AP2-EREBP-type transcription factor, partial [Zea mays subsp. mays]
GRMZM2G091540	2545.18	12.02	63.74	0.81	3	1.88897	Up	2.49404e-06	4.13625e-05	-	K14664|1|7e-141|499|zma:100304432|IAA-amino acid hydrolase [EC:3.5.1.-]	GO:0031410//cytoplasmic vesicle;GO:0031410//cytoplasmic vesicle	GO:0003824//catalytic activity;GO:0003824//catalytic activity	-	gi|259490759|ref|NP_001159338.1|/0/hypothetical protein precursor [Zea mays]
GRMZM2G063896	695.52	11.06	53.75	2.64	9.62	1.8655	Up	3.8484e-05	0.000477777	-	K11254|1|2e-34|141|mtr:MTR_2g096100|histone H4	GO:0000785//chromatin;GO:0031090//organelle membrane;GO:0009536//plastid;GO:0000785//chromatin;GO:0031090//organelle membrane;GO:0009536//plastid;GO:0000785//chromatin;GO:0031090//organelle membrane;GO:0009536//plastid;GO:0000785//chromatin;GO:0031090//organelle membrane;GO:0009536//plastid	GO:0003676//nucleic acid binding;GO:0003676//nucleic acid binding;GO:0003676//nucleic acid binding;GO:0003676//nucleic acid binding	GO:0034728//nucleosome organization;GO:0034728//nucleosome organization;GO:0034728//nucleosome organization;GO:0034728//nucleosome organization	gi|413949623|gb|AFW82272.1|/8.10448e-45/histone H4.3 [Zea mays]
GRMZM2G118957	1083.34	15.44	67.16	2.08	7.57	1.86371	Up	8.70612e-06	0.000128751	-	-	-	GO:0046914//transition metal ion binding;GO:0046914//transition metal ion binding;GO:0046914//transition metal ion binding;GO:0046914//transition metal ion binding;GO:0046914//transition metal ion binding;GO:0046914//transition metal ion binding	-	gi|226958378|ref|NP_001152950.1|/8.52553e-129/protein binding protein [Zea mays]
GRMZM2G125529	1386.83	40	188	4.59	16.44	1.84064	Up	9.40622e-15	5.70005e-13	-	-	-	GO:0005488//binding;GO:0005488//binding;GO:0005488//binding	-	gi|413923111|gb|AFW63043.1|/6.63922e-103/hypothetical protein ZEAMMB73_351066 [Zea mays]
GRMZM2G149040	1672.81	9.32	47.06	0.95	3.4	1.83954	Up	5.46494e-05	0.00064508	-	-	GO:0043231//intracellular membrane-bounded organelle;GO:0043231//intracellular membrane-bounded organelle	GO:0003677//DNA binding;GO:0001071//nucleic acid binding transcription factor activity;GO:0005515//protein binding;GO:0003677//DNA binding;GO:0001071//nucleic acid binding transcription factor activity;GO:0005515//protein binding	GO:0006351//transcription, DNA-dependent;GO:0006351//transcription, DNA-dependent	gi|226533528|ref|NP_001141404.1|/8.14537e-74/putative bZIP transcription factor superfamily protein [Zea mays]
GRMZM2G035008	2762.05	10.6	52.84	0.64	2.29	1.8392	Up	2.20194e-05	0.000292044	-	K07297|1|1e-14|80.5|sbi:SORBI_10g025230|adiponectin receptor;K00001|2|4e-11|68.9|sbi:SORBI_04g027090|alcohol dehydrogenase [EC:1.1.1.1]	GO:0016020//membrane;GO:0043231//intracellular membrane-bounded organelle;GO:0043231//intracellular membrane-bounded organelle;GO:0043231//intracellular membrane-bounded organelle;GO:0043231//intracellular membrane-bounded organelle;GO:0043231//intracellular membrane-bounded organelle	GO:0005488//binding;GO:0046914//transition metal ion binding;GO:0003676//nucleic acid binding;GO:0046914//transition metal ion binding;GO:0003676//nucleic acid binding;GO:0046914//transition metal ion binding;GO:0003676//nucleic acid binding;GO:0046914//transition metal ion binding;GO:0003676//nucleic acid binding;GO:0046914//transition metal ion binding;GO:0003676//nucleic acid binding	-	gi|223946381|gb|ACN27274.1|/1.88068e-119/unknown [Zea mays]
GRMZM2G065641	1065	9.75	48.28	1.56	5.54	1.82834	Up	3.75416e-05	0.000467705	-	K07053|1|8e-84|211|zma:100282157|	-	GO:0003676//nucleic acid binding;GO:0034061;GO:0003676//nucleic acid binding;GO:0034061	GO:0006259//DNA metabolic process;GO:0006259//DNA metabolic process	gi|413954708|gb|AFW87357.1|/7.31821e-142/hypothetical protein ZEAMMB73_003344 [Zea mays]
GRMZM2G071630	1481.48	21.28	96.76	2.24	7.91	1.82018	Up	5.92982e-08	1.3976e-06	-	K00134|1|0.0|637|zma:542333|glyceraldehyde 3-phosphate dehydrogenase [EC:1.2.1.12]	-	GO:0000166//nucleotide binding;GO:0000166//nucleotide binding	GO:0006007//glucose catabolic process;GO:0006007//glucose catabolic process	gi|162462949|ref|NP_001105385.1|/0/glyceraldehyde-3-phosphate dehydrogenase 3, cytosolic [Zea mays]
GRMZM2G321290	1503.96	15	63	1.44	5.07	1.81592	Up	3.40092e-05	0.000429319	-	K01058|1|2e-21|100|rcu:RCOM_1607830|phospholipase A1 [EC:3.1.1.32]	GO:0043231//intracellular membrane-bounded organelle	GO:0004091//carboxylesterase activity;GO:0004091//carboxylesterase activity	GO:0044238//primary metabolic process;GO:0044238//primary metabolic process	gi|226529304|ref|NP_001152663.1|/0/triacylglycerol lipase precursor [Zea mays]
GRMZM5G879278	1386.78	13.07	62.6	1.57	5.47	1.80078	Up	9.04486e-06	0.000132934	-	-	-	-	-	gi|226531858|ref|NP_001141932.1|/1.52542e-161/uncharacterized protein LOC100274081 [Zea mays]
GRMZM2G008726	1308.03	11	53	1.42	4.92	1.79277	Up	3.8484e-05	0.00047757	-	K06966|1|1e-43|175|zma:100282181|	-	GO:0003824//catalytic activity	-	gi|226491221|ref|NP_001148565.1|/3.64311e-122/lysine decarboxylase-like protein [Zea mays]
GRMZM2G106445	935	175.79	847.35	32.45	111.31	1.77829	Up	3.2211e-63	1.16375e-60	-	-	-	-	-	gi|226492144|ref|NP_001151919.1|/1.30431e-21/wound induced protein [Zea mays]
GRMZM5G894932	921	27.43	129.96	5.14	17.34	1.75426	Up	1.03598e-10	3.80062e-09	-	K13628|1|2e-12|71.2|cre:CHLREDRAFT_196772|iron-sulfur cluster assembly protein	GO:0043231//intracellular membrane-bounded organelle	GO:0051540	GO:0031163	gi|226529127|ref|NP_001148399.1|/2.53046e-78/protein aq_1857 [Zea mays]
GRMZM2G073044	1400	169.87	805.27	20.67	69.72	1.75403	Up	3.84484e-59	1.29105e-56	-	-	-	-	-	gi|195626864|gb|ACG35262.1|/4.98996e-141/seed specific protein Bn15D17A [Zea mays]
GRMZM2G175856	684	25	114	6.4	20.78	1.69905	Up	3.4626e-09	1.00539e-07	-	K09286|1|5e-13|72.8|ath:AT4G25480|EREBP-like factor	-	-	-	gi|414869803|tpg|DAA48360.1|/3.52323e-51/TPA: putative AP2/EREBP transcription factor superfamily protein [Zea mays]
GRMZM2G419994	1492	48.96	222	5.58	18.01	1.69046	Up	6.9656e-17	5.28756e-15	-	-	-	-	-	gi|226529485|ref|NP_001146118.1|/4.09707e-64/uncharacterized protein LOC100279659 [Zea mays]
GRMZM5G807791	1221.98	16.97	74.65	2.31	7.43	1.68547	Up	1.77481e-06	3.05712e-05	-	K14015|1|3e-59|228|zma:100194136|nuclear protein localization protein 4 homolog	GO:0043231//intracellular membrane-bounded organelle	GO:0005515//protein binding	-	gi|413922638|gb|AFW62570.1|/9.78035e-116/hypothetical protein ZEAMMB73_980053 [Zea mays]
GRMZM2G002903	1697.49	26.82	113.26	2.51	8.05	1.6813	Up	1.11375e-08	3.00459e-07	-	-	GO:0044464//cell part;GO:0044464//cell part	GO:0005488//binding;GO:0005488//binding;GO:0005488//binding	GO:0051234//establishment of localization;GO:0051234//establishment of localization	gi|226531067|ref|NP_001140798.1|/0/uncharacterized protein LOC100272873 [Zea mays]
GRMZM2G334680	396	12	54	5.53	17.71	1.67921	Up	6.43266e-05	0.000741523	-	-	-	-	-	gi|414587686|tpg|DAA38257.1|/8.13224e-32/TPA: hypothetical protein ZEAMMB73_389934 [Zea mays]
GRMZM5G878834	1345	14.66	66	1.86	5.95	1.67759	Up	5.25488e-06	8.12485e-05	-	-	-	-	-	gi|413949145|gb|AFW81794.1|/2.06664e-104/hypothetical protein ZEAMMB73_017431 [Zea mays]
GRMZM2G091595	1004.7	54.21	202.78	7.89	24.72	1.64758	Up	4.75196e-12	2.05501e-10	-	K12589|1|2e-133|474|zma:100856959|exosome complex component RRP42	GO:0044424//intracellular part;GO:0043231//intracellular membrane-bounded organelle	GO:0003676//nucleic acid binding;GO:0008408//3'-5' exonuclease activity;GO:0005515//protein binding;GO:0008428//ribonuclease inhibitor activity;GO:0046914//transition metal ion binding;GO:0003676//nucleic acid binding;GO:0008408//3'-5' exonuclease activity;GO:0003676//nucleic acid binding;GO:0008408//3'-5' exonuclease activity;GO:0003676//nucleic acid binding;GO:0008408//3'-5' exonuclease activity	GO:0010467//gene expression;GO:0019219;GO:0060699//regulation of endoribonuclease activity;GO:0033554//cellular response to stress;GO:0045005//maintenance of fidelity involved in DNA-dependent DNA replication;GO:0010467//gene expression;GO:0010467//gene expression;GO:0010467//gene expression	gi|363543527|ref|NP_001241774.1|/2.82304e-132/exosome complex exonuclease RRP42 [Zea mays]
GRMZM2G350795	967	14.38	63.24	2.56	8.02	1.64746	Up	1.50728e-05	0.000209042	-	K08494|1|7e-24|109|osa:4332931|novel plant SNARE	-	-	-	gi|414588727|tpg|DAA39298.1|/4.50307e-57/TPA: hypothetical protein ZEAMMB73_035156 [Zea mays]
GRMZM2G037189	1247	15	66	2.06	6.44	1.64442	Up	1.22863e-05	0.000174552	-	-	-	-	-	gi|219885781|gb|ACL53265.1|/3.71624e-44/unknown [Zea mays]
AC203989.4_FG001	930	215	944	39.91	124.7	1.64364	Up	6.50272e-63	2.32001e-60	-	K10712|1|5e-126|448|zma:100282770|cysteamine dioxygenase [EC:1.13.11.19]	-	-	-	gi|414869035|tpg|DAA47592.1|/4.62241e-128/TPA: hypothetical protein ZEAMMB73_943532 [Zea mays]
GRMZM2G056495	1575.63	17.42	69.63	1.71	5.34	1.64284	Up	2.18138e-05	0.000289721	-	K14015|1|4e-151|532|sbi:SORBI_03g041070|nuclear protein localization protein 4 homolog	-	-	-	gi|414879508|tpg|DAA56639.1|/0/TPA: NPL4 family protein [Zea mays]
GRMZM2G028500	848.77	30.37	132.28	6.17	19.22	1.63927	Up	4.69114e-10	1.54256e-08	-	-	-	-	-	gi|226502959|ref|NP_001142814.1|/2.04059e-47/uncharacterized protein LOC100275193 [Zea mays]
GRMZM2G131421	994.66	282.92	1239.61	49.07	152.7	1.63779	Up	4.26078e-82	2.09674e-79	-	-	-	-	-	gi|224035209|gb|ACN36680.1|/1.77608e-48/unknown [Zea mays]
GRMZM2G474656	2855	16.78	73.26	0.99	3.07	1.63274	Up	2.51776e-06	4.17074e-05	-	K11657|1|2e-118|425|zma:542440|remodeling and spacing factor 1	GO:0043231//intracellular membrane-bounded organelle	GO:0046914//transition metal ion binding;GO:0003677//DNA binding;GO:0001071//nucleic acid binding transcription factor activity	GO:0006351//transcription, DNA-dependent	gi|413946205|gb|AFW78854.1|/0/putative homeodomain-like transcription factor superfamily protein [Zea mays]
GRMZM2G408458	1191	28	121	4.02	12.37	1.62158	Up	3.78378e-09	1.09308e-07	-	K13230|1|6e-157|551|zma:100147731|2,4,7-trihydroxy-1,4-benzoxazin-3-one-glucoside 7-O-methyltransferase [EC:2.1.1.241];K16040|2|4e-53|207|vvi:100233030|trans-resveratrol di-O-methyltransferase [EC:2.1.1.240];K05279|3|8e-21|99.8|sbi:SORBI_07g003860|flavonol 3-O-methyltransferase [EC:2.1.1.76]	-	GO:0008168//methyltransferase activity	-	gi|413920822|gb|AFW60754.1|/0/hypothetical protein ZEAMMB73_626448 [Zea mays]
GRMZM2G135199	2195.06	17	66	1.19	3.61	1.60104	Up	5.77294e-05	0.000676679	-	-	GO:0044464//cell part;GO:0044464//cell part	GO:0017111//nucleoside-triphosphatase activity;GO:0005363//maltose transmembrane transporter activity;GO:0032559;GO:0017111//nucleoside-triphosphatase activity;GO:0032559	GO:0009207;GO:0009207	gi|414874043|tpg|DAA52600.1|/1.06503e-94/TPA: hypothetical protein ZEAMMB73_610923 [Zea mays]
GRMZM2G096372	1071	16	67	2.57	7.64	1.5718	Up	1.95517e-05	0.000262733	-	-	-	-	-	gi|413933831|gb|AFW68382.1|/7.73386e-93/hypothetical protein ZEAMMB73_718017 [Zea mays]
GRMZM2G092182	1568.31	27.34	111.3	2.89	8.58	1.56991	Up	4.74974e-08	1.1335e-06	-	K14945|1|2e-20|98.2|sbi:SORBI_04g029520|protein quaking	GO:0043231//intracellular membrane-bounded organelle;GO:0043231//intracellular membrane-bounded organelle;GO:0043231//intracellular membrane-bounded organelle;GO:0043231//intracellular membrane-bounded organelle;GO:0043231//intracellular membrane-bounded organelle	GO:0003676//nucleic acid binding;GO:0003676//nucleic acid binding;GO:0003676//nucleic acid binding;GO:0003676//nucleic acid binding;GO:0003676//nucleic acid binding;GO:0003676//nucleic acid binding	-	gi|413923730|gb|AFW63662.1|/2.41175e-59/hypothetical protein ZEAMMB73_233372, partial [Zea mays]
GRMZM2G061791	2764	15.07	63.08	0.92	2.73	1.5692	Up	3.40092e-05	0.000429129	-	K03255|1|3e-24|57.0|bdi:100836869|protein TIF31	-	-	-	gi|357137301|ref|XP_003570239.1|/4.66112e-23/PREDICTED: protein KIAA0664 homolog [Brachypodium distachyon]
GRMZM2G161905	936	23.38	97.11	4.31	12.74	1.56361	Up	2.16334e-07	4.56702e-06	-	K00799|1|4e-84|309|zma:541841|glutathione S-transferase [EC:2.5.1.18]	-	GO:0016740//transferase activity	-	gi|413957263|gb|AFW89912.1|/2.55596e-118/glutathione S-transferase GST 25 [Zea mays]
GRMZM2G001088	1895.19	45.3	184.62	3.97	11.73	1.56299	Up	2.0809e-12	9.35324e-11	-	K14765|1|2e-142|504|zma:100276800|U3 small nucleolar ribonucleoprotein protein LCP5	-	-	-	gi|194695770|gb|ACF81969.1|/2.66626e-143/unknown [Zea mays]
GRMZM2G147288	3820	15	62.45	0.66	1.95	1.56294	Up	4.74996e-05	0.000573491	-	-	-	-	-	gi|413922681|gb|AFW62613.1|/0/hypothetical protein ZEAMMB73_969064 [Zea mays]
GRMZM2G181242	617	20	83	5.71	16.87	1.5629	Up	2.16288e-06	3.65284e-05	-	-	-	-	-	gi|414878385|tpg|DAA55516.1|/1.13143e-11/TPA: putative leucine-rich repeat receptor-like protein kinase family protein [Zea mays]
GRMZM2G103276	1092	18.76	77.84	2.95	8.71	1.56196	Up	3.32226e-06	5.36335e-05	-	-	-	-	-	gi|226509300|ref|NP_001142845.1|/2.18538e-66/hypothetical protein [Zea mays]
GRMZM2G104419	3072	19.83	81.76	1.08	3.18	1.558	Up	1.92076e-06	3.28474e-05	-	K01507|1|0.0|1412|sbi:SORBI_04g005710|inorganic pyrophosphatase [EC:3.6.1.1]	GO:0016021//integral to membrane;GO:0031410//cytoplasmic vesicle	GO:0046872//metal ion binding;GO:0015405;GO:0016462//pyrophosphatase activity	GO:0006818//hydrogen transport	gi|413926334|gb|AFW66266.1|/0/hypothetical protein ZEAMMB73_353171 [Zea mays]
GRMZM2G094353	996.83	24.92	102.5	4.3	12.6	1.55102	Up	9.00038e-08	2.05511e-06	-	-	-	-	-	gi|212721502|ref|NP_001132718.1|/1.1129e-72/uncharacterized protein LOC100194201 [Zea mays]
GRMZM2G161506	1529	16.25	66.7	1.81	5.28	1.54455	Up	2.72782e-05	0.000353255	-	K07574|1|1e-39|162|mtr:MTR_4g071330|RNA-binding protein	GO:0043231//intracellular membrane-bounded organelle	GO:0003676//nucleic acid binding	-	gi|212723242|ref|NP_001132805.1|/3.421e-106/uncharacterized protein LOC100194294 [Zea mays]
GRMZM2G417004	2423	29.92	121.55	2.08	6.01	1.53078	Up	8.33058e-09	2.30176e-07	-	K08739|1|6e-32|137|bdi:100827102|DNA mismatch repair protein MLH3;K08507|2|3e-22|105|zma:100285634|unconventional SNARE in the endoplasmic reticulum protein 1	-	GO:0005488//binding	-	gi|414590137|tpg|DAA40708.1|/1.1332e-80/TPA: hypothetical protein ZEAMMB73_047996 [Zea mays]
GRMZM2G081644	1609	16	65	1.69	4.88	1.52986	Up	3.79584e-05	0.000471868	-	-	-	-	-	gi|242064620|ref|XP_002453599.1|/4.52164e-40/hypothetical protein SORBIDRAFT_04g008770 [Sorghum bicolor]
GRMZM2G047370	1996.46	22	82	1.72	4.94	1.5221	Up	1.29133e-05	0.000181921	-	-	GO:0043231//intracellular membrane-bounded organelle	GO:0003676//nucleic acid binding;GO:0003677//DNA binding;GO:0005515//protein binding	GO:0010467//gene expression	gi|226509448|ref|NP_001146488.1|/9.33023e-180/uncharacterized protein LOC100280076 [Zea mays]
GRMZM2G048092	795	25	101	5.47	15.71	1.52207	Up	2.70538e-07	5.57926e-06	-	K15631|1|2e-80|296|sbi:SORBI_10g026910|molybdenum cofactor sulfurtransferase [EC:2.8.1.9]	-	GO:0046914//transition metal ion binding;GO:0016846//carbon-sulfur lyase activity;GO:0048037//cofactor binding	GO:0006952//defense response;GO:0017038//protein import;GO:0009687//abscisic acid metabolic process;GO:0042040;GO:0006970//response to osmotic stress;GO:0009755//hormone-mediated signaling pathway	gi|242093872|ref|XP_002437426.1|/3.07542e-79/hypothetical protein SORBIDRAFT_10g026910 [Sorghum bicolor]
GRMZM2G075255	2367.8	17	65	1.15	3.29	1.51645	Up	7.9423e-05	0.000888628	-	K15404|1|2e-46|184|sbi:SORBI_01g019590|aldehyde decarbonylase [EC:4.1.99.5]	GO:0031224//intrinsic to membrane;GO:0043231//intracellular membrane-bounded organelle;GO:0044420//extracellular matrix part	GO:0046914//transition metal ion binding;GO:0003824//catalytic activity	GO:0006633//fatty acid biosynthetic process;GO:0003006//developmental process involved in reproduction;GO:0008152//metabolic process;GO:0008152//metabolic process	gi|413937832|gb|AFW72383.1|/1.23795e-66/hypothetical protein ZEAMMB73_077345 [Zea mays]
GRMZM2G125149	1169	25.31	101.67	3.71	10.6	1.51457	Up	2.70538e-07	5.58329e-06	-	-	-	GO:0009975//cyclase activity;GO:0005506//iron ion binding;GO:0009975//cyclase activity;GO:0005506//iron ion binding;GO:0009975//cyclase activity;GO:0005506//iron ion binding	GO:0006164//purine nucleotide biosynthetic process;GO:0048193//Golgi vesicle transport;GO:0006164//purine nucleotide biosynthetic process;GO:0048193//Golgi vesicle transport;GO:0006164//purine nucleotide biosynthetic process;GO:0048193//Golgi vesicle transport	gi|413919855|gb|AFW59787.1|/9.53031e-100/hypothetical protein ZEAMMB73_570567 [Zea mays]
GRMZM2G060011	1145	18	72	2.69	7.67	1.51162	Up	1.73996e-05	0.000237616	-	-	GO:0009526//plastid envelope	GO:0016872//intramolecular lyase activity	GO:0009699//phenylpropanoid biosynthetic process;GO:0006575//cellular modified amino acid metabolic process	gi|414590591|tpg|DAA41162.1|/6.50464e-125/TPA: chalcone isomerase [Zea mays]
GRMZM2G040642	1711.02	13	57	1.41	4.02	1.5115	Up	5.22668e-05	0.000621324	-	K01090|1|1e-39|137|sbi:SORBI_01g038410|protein phosphatase [EC:3.1.3.16];K14497|3|6e-36|127|smo:SELMODRAFT_179532|protein phosphatase 2C [EC:3.1.3.16]	GO:0043234//protein complex;GO:0043234//protein complex	GO:0004721//phosphoprotein phosphatase activity;GO:0043169//cation binding;GO:0004721//phosphoprotein phosphatase activity;GO:0043169//cation binding	GO:0006464//cellular protein modification process;GO:0006464//cellular protein modification process	gi|212722022|ref|NP_001132296.1|/0/uncharacterized protein LOC100193736 [Zea mays]
GRMZM2G081585	1487	35.59	141.61	4.07	11.53	1.50229	Up	1.19278e-09	3.74526e-08	-	K04564|1|2e-15|82.0|pop:POPTR_253123|superoxide dismutase, Fe-Mn family [EC:1.15.1.1]	GO:0043231//intracellular membrane-bounded organelle;GO:0043231//intracellular membrane-bounded organelle	GO:0003824//catalytic activity;GO:0016209//antioxidant activity;GO:0043169//cation binding;GO:0003824//catalytic activity;GO:0016209//antioxidant activity;GO:0043169//cation binding	GO:0072593//reactive oxygen species metabolic process;GO:0072593//reactive oxygen species metabolic process	gi|413917998|gb|AFW57930.1|/5.18973e-74/hypothetical protein ZEAMMB73_792704 [Zea mays]
AC210013.4_FG009	906	29	115	5.53	15.61	1.49712	Up	5.84164e-08	1.38023e-06	-	-	-	-	-	gi|413932705|gb|AFW67256.1|/7.73629e-157/putative RING zinc finger domain superfamily protein [Zea mays]
GRMZM2G065596	3321	46	182	2.32	6.54	1.49517	Up	8.30504e-12	3.50137e-10	-	-	GO:0043231//intracellular membrane-bounded organelle	-	-	gi|94502659|ref|YP_588302.1|/2.18639e-61/hypothetical protein ZeamMp040 [Zea mays subsp. mays]
GRMZM2G032280	1710	18	71	1.78	5.01	1.49293	Up	2.40562e-05	0.000316265	-	-	-	GO:0018271//biotin-protein ligase activity	GO:0043412//macromolecule modification	gi|413935693|gb|AFW70244.1|/0/hypothetical protein ZEAMMB73_969350 [Zea mays]
GRMZM2G177084	255	16	63	12.12	33.97	1.48687	Up	7.29068e-05	0.000824448	-	-	-	-	-	gi|413953860|gb|AFW86509.1|/3.05696e-15/hypothetical protein ZEAMMB73_868311 [Zea mays]
GRMZM5G808756	1206.84	266.65	1024.75	36.97	103.36	1.48325	Up	2.3441e-57	7.51745e-55	-	-	-	-	-	gi|293332269|ref|NP_001170052.1|/5.31732e-82/uncharacterized protein LOC100383968 [Zea mays]
GRMZM2G446515	2070	67	238	4.96	13.82	1.47835	Up	5.6297e-13	2.74203e-11	-	K14503|1|2e-07|56.2|zma:100284828|brassinosteroid resistant 1/2	GO:0009536//plastid;GO:0016020//membrane;GO:0043231//intracellular membrane-bounded organelle;GO:0043231//intracellular membrane-bounded organelle;GO:0009536//plastid;GO:0016020//membrane	GO:0003824//catalytic activity;GO:0016160//amylase activity;GO:0004672//protein kinase activity;GO:0005102//receptor binding;GO:0043167//ion binding;GO:0032559;GO:0043167//ion binding;GO:0016160//amylase activity;GO:0043167//ion binding;GO:0016160//amylase activity;GO:0016160//amylase activity;GO:0004672//protein kinase activity;GO:0005102//receptor binding;GO:0043167//ion binding;GO:0032559;GO:0…	GO:0005975//carbohydrate metabolic process;GO:0009933//meristem structural organization;GO:0007167//enzyme linked receptor protein signaling pathway;GO:0010073//meristem maintenance;GO:0005976//polysaccharide metabolic process;GO:0003006//developmental process involved in reproduction;GO:0006464//cellular protein modification process;GO:0005976//polysaccharide metabolic process;GO:0005976//polysa…	gi|195614386|gb|ACG29023.1|/0/beta-amylase [Zea mays]
GRMZM2G416156	1135	22	85.99	3.32	9.24	1.47671	Up	5.03828e-06	7.81111e-05	-	-	-	-	-	gi|414867159|tpg|DAA45716.1|/4.89938e-19/TPA: hypothetical protein ZEAMMB73_751818 [Zea mays]
GRMZM2G039251	1587.51	42.02	153.91	4.23	11.71	1.46901	Up	3.98306e-09	1.14486e-07	-	K01899|1|2e-49|194|zma:100283329|succinyl-CoA synthetase alpha subunit [EC:6.2.1.4 6.2.1.5]	GO:0043231//intracellular membrane-bounded organelle	GO:0004774//succinate-CoA ligase activity;GO:0046912//transferase activity, transferring acyl groups, acyl groups converted into alkyl on transfer;GO:0032559;GO:0016874//ligase activity	GO:0009060//aerobic respiration;GO:0006732//coenzyme metabolic process;GO:0043648//dicarboxylic acid metabolic process;GO:0008152//metabolic process	gi|226491860|ref|NP_001149702.1|/6.48491e-162/succinyl-CoA ligase alpha-chain 2 [Zea mays]
GRMZM2G046587	1073	18	70	2.88	7.97	1.46851	Up	3.31752e-05	0.000420465	-	K01507|1|7e-91|332|zma:100383920|inorganic pyrophosphatase [EC:3.6.1.1]	GO:0044424//intracellular part;GO:0044424//intracellular part;GO:0044424//intracellular part	GO:0046872//metal ion binding;GO:0016462//pyrophosphatase activity;GO:0046872//metal ion binding;GO:0016462//pyrophosphatase activity;GO:0046872//metal ion binding;GO:0016462//pyrophosphatase activity	GO:0006793//phosphorus metabolic process;GO:0006793//phosphorus metabolic process;GO:0006793//phosphorus metabolic process	gi|293336730|ref|NP_001170012.1|/1.2315e-114/uncharacterized protein LOC100383920 [Zea mays]
GRMZM2G068443	1082	49	190	7.77	21.45	1.46499	Up	5.84494e-12	2.51244e-10	-	K14864|1|3e-12|71.2|ppp:PHYPADRAFT_107519|tRNA (cytidine32/guanosine34-2'-O)-methyltransferase [EC:2.1.1.205];K14857|2|2e-10|64.7|olu:OSTLU_89244|AdoMet-dependent rRNA methyltransferase SPB1 [EC:2.1.1.-]	-	GO:0005488//binding;GO:0008168//methyltransferase activity	GO:0006730//one-carbon metabolic process;GO:0000154//rRNA modification	gi|414873670|tpg|DAA52227.1|/4.59152e-109/TPA: hypothetical protein ZEAMMB73_375323 [Zea mays]
GRMZM2G051270	1930.51	91.99	344.86	7.8	21.5	1.46279	Up	8.17354e-20	7.52546e-18	-	K13811|1|0.0|761|zma:541653|3'-phosphoadenosine 5'-phosphosulfate synthase [EC:2.7.7.4 2.7.1.25]	GO:0043231//intracellular membrane-bounded organelle;GO:0043231//intracellular membrane-bounded organelle;GO:0043231//intracellular membrane-bounded organelle	GO:0004779//sulfate adenylyltransferase activity;GO:0004779//sulfate adenylyltransferase activity;GO:0004779//sulfate adenylyltransferase activity	GO:0006790//sulfur compound metabolic process;GO:0006790//sulfur compound metabolic process;GO:0006790//sulfur compound metabolic process	gi|413933103|gb|AFW67654.1|/0/ATP sulfurylase [Zea mays]
AC183888.4_FG006	630	28	108	7.82	21.47	1.45708	Up	2.60756e-07	5.39703e-06	-	K03671|1|1e-13|74.7|zma:541940|thioredoxin 1	-	GO:0015036//disulfide oxidoreductase activity	GO:0018904;GO:0006091//generation of precursor metabolites and energy;GO:0019725//cellular homeostasis	gi|413926874|gb|AFW66806.1|/3.71827e-94/hypothetical protein ZEAMMB73_516632 [Zea mays]
GRMZM2G127714	1606.55	27	105	2.88	7.9	1.45578	Up	3.2772e-07	6.62919e-06	-	-	-	-	-	gi|195643224|gb|ACG41080.1|/1.76038e-92/hypothetical protein [Zea mays]
GRMZM2G541687	1327	33	126.97	4.24	11.61	1.45323	Up	3.23596e-08	8.01047e-07	-	-	-	-	-	gi|238012968|gb|ACR37519.1|/6.47203e-26/unknown [Zea mays]
GRMZM2G004959	1225	15	61	2.22	6.06	1.44876	Up	6.6158e-05	0.000759872	-	K09377|1|5e-61|233|gmx:100527547|cysteine and glycine-rich protein	-	GO:0046914//transition metal ion binding;GO:0046872//metal ion binding	-	gi|413942012|gb|AFW74661.1|/1.10049e-86/putative LIM-type zinc finger domain family protein [Zea mays]
GRMZM2G111603	1519.7	19.87	72.67	2.12	5.78	1.44701	Up	3.60176e-05	0.000451279	-	K15865|1|2e-96|181|sbi:SORBI_06g017040|CDK5 regulatory subunit-associated protein 1-like 1	GO:0043231//intracellular membrane-bounded organelle;GO:0043231//intracellular membrane-bounded organelle;GO:0043231//intracellular membrane-bounded organelle;GO:0043231//intracellular membrane-bounded organelle;GO:0043231//intracellular membrane-bounded organelle;GO:0043231//intracellular membrane-bounded organelle;GO:0043231//intracellular membrane-bounded organelle	GO:0051536//iron-sulfur cluster binding;GO:0016628//oxidoreductase activity, acting on the CH-CH group of donors, NAD or NADP as acceptor;GO:0051536//iron-sulfur cluster binding;GO:0016628//oxidoreductase activity, acting on the CH-CH group of donors, NAD or NADP as acceptor;GO:0051536//iron-sulfur cluster binding;GO:0016628//oxidoreductase activity, acting on the CH-CH group of donors, NAD or NA…	GO:0016070//RNA metabolic process;GO:0016070//RNA metabolic process;GO:0016070//RNA metabolic process;GO:0016070//RNA metabolic process;GO:0016070//RNA metabolic process;GO:0016070//RNA metabolic process;GO:0016070//RNA metabolic process	gi|242075846|ref|XP_002447859.1|/2.62806e-95/hypothetical protein SORBIDRAFT_06g017040 [Sorghum bicolor]
GRMZM2G075260	2076	18	68.82	1.46	3.98	1.4468	Up	6.26008e-05	0.000724849	-	-	-	-	-	gi|413938718|gb|AFW73269.1|/0/hypothetical protein ZEAMMB73_298159 [Zea mays]
GRMZM5G819302	1720	248.35	947.25	24.47	66.43	1.44082	Up	1.45835e-52	4.38149e-50	-	-	-	-	-	gi|414877139|tpg|DAA54270.1|/4.66982e-123/TPA: hypothetical protein ZEAMMB73_458397 [Zea mays]
GRMZM5G877708	1312.43	25.73	91.69	3.13	8.48	1.4379	Up	6.29728e-06	9.57576e-05	-	-	GO:0043231//intracellular membrane-bounded organelle;GO:0043231//intracellular membrane-bounded organelle	GO:0003824//catalytic activity;GO:0003824//catalytic activity	GO:0006163//purine nucleotide metabolic process;GO:0006163//purine nucleotide metabolic process	gi|413955787|gb|AFW88436.1|/6.12707e-160/hypothetical protein ZEAMMB73_754999 [Zea mays]
GRMZM2G176307	1388.13	197.48	753.02	24.28	65.77	1.43766	Up	3.3991e-42	7.82396e-40	gpc4	K00134|1|0.0|639|zma:100037774|glyceraldehyde 3-phosphate dehydrogenase [EC:1.2.1.12]	-	GO:0000166//nucleotide binding;GO:0000166//nucleotide binding	GO:0006007//glucose catabolic process;GO:0006007//glucose catabolic process	gi|413937638|gb|AFW72189.1|/0/cytosolic glyceroldehyde-3-phosphate dehydrogenase GAPC4 isoform 1 [Zea mays]
GRMZM2G326235	1029	20	75.81	3.34	9.02	1.43328	Up	2.83932e-05	0.000366034	-	-	-	-	-	gi|293333925|ref|NP_001168457.1|/2.28805e-94/uncharacterized protein LOC100382231 [Zea mays]
GRMZM2G420108	786	42.89	161.74	9.49	25.47	1.42432	Up	3.43544e-10	1.16316e-08	-	-	GO:0043231//intracellular membrane-bounded organelle;GO:0043231//intracellular membrane-bounded organelle	-	-	gi|226501624|ref|NP_001144312.1|/2.90893e-58/uncharacterized protein LOC100277204 [Zea mays]
GRMZM2G126541	1767	21	79	2.01	5.39	1.42309	Up	1.63779e-05	0.000224416	-	K09645|1|6e-133|473|sbi:SORBI_05g026165|vitellogenic carboxypeptidase-like protein [EC:3.4.16.-]	-	-	-	gi|413920250|gb|AFW60182.1|/0/hypothetical protein ZEAMMB73_105524 [Zea mays]
GRMZM2G053722	2965	21	79	1.19	3.19	1.42259	Up	1.63779e-05	0.000224524	-	K04345|1|0.0|1051|vvi:100266345|protein kinase A [EC:2.7.11.11]	GO:0043234//protein complex;GO:0016020//membrane	GO:0043169//cation binding;GO:0004690//cyclic nucleotide-dependent protein kinase activity;GO:0004721//phosphoprotein phosphatase activity;GO:0032559;GO:0019887//protein kinase regulator activity	GO:0006468//protein phosphorylation	gi|413925848|gb|AFW65780.1|/0/hypothetical protein ZEAMMB73_978885 [Zea mays]
GRMZM2G033027	1574	29.01	116	3.33	8.91	1.4199	Up	4.239e-08	1.02015e-06	-	-	-	-	-	gi|414883429|tpg|DAA59443.1|/9.77346e-84/TPA: hypothetical protein ZEAMMB73_138994 [Zea mays]
GRMZM5G887389	1096	18.18	68.01	2.85	7.58	1.41124	Up	6.26008e-05	0.000724555	-	-	-	-	-	gi|413943328|gb|AFW75977.1|/5.80213e-51/hypothetical protein ZEAMMB73_594064 [Zea mays]
GRMZM5G829897	964	21	78	3.75	9.93	1.4049	Up	2.23592e-05	0.000296275	-	-	-	GO:0016787//hydrolase activity	GO:0044238//primary metabolic process	gi|413942925|gb|AFW75574.1|/7.99239e-115/carboxylic ester hydrolase/ hydrolase, acting on ester bond [Zea mays]
GRMZM2G092923	1359	28	104	3.51	9.28	1.40265	Up	9.05796e-07	1.66473e-05	-	K00939|1|6e-18|88.6|sbi:SORBI_01g048360|adenylate kinase [EC:2.7.4.3]	GO:0043231//intracellular membrane-bounded organelle;GO:0009532//plastid stroma;GO:0009536//plastid	GO:0019205//nucleobase-containing compound kinase activity;GO:0016776//phosphotransferase activity, phosphate group as acceptor;GO:0032559;GO:0016776//phosphotransferase activity, phosphate group as acceptor;GO:0019205//nucleobase-containing compound kinase activity;GO:0032559;GO:0019205//nucleobase-containing compound kinase activity;GO:0016776//phosphotransferase activity, phosphate group as ac…	GO:0009117//nucleotide metabolic process;GO:0006796//phosphate-containing compound metabolic process;GO:0006796//phosphate-containing compound metabolic process;GO:0009117//nucleotide metabolic process;GO:0006520//cellular amino acid metabolic process;GO:0048513//organ development;GO:0009117//nucleotide metabolic process;GO:0006796//phosphate-containing compound metabolic process	gi|414864601|tpg|DAA43158.1|/3.49721e-19/TPA: hypothetical protein ZEAMMB73_193528, partial [Zea mays]
GRMZM2G151807	1373.82	282.69	1062.39	35.69	93.78	1.39376	Up	1.42495e-57	4.6217e-55	-	-	-	-	-	gi|293332269|ref|NP_001170052.1|/9.16756e-79/uncharacterized protein LOC100383968 [Zea mays]
GRMZM5G867121	812	19	70	4.06	10.65	1.3913	Up	6.72514e-05	0.00077057	-	-	-	-	-	gi|414867512|tpg|DAA46069.1|/2.14163e-27/TPA: hypothetical protein ZEAMMB73_523938 [Zea mays]
GRMZM2G060161	1064	32	118	5.17	13.56	1.39112	Up	1.91085e-07	4.08536e-06	-	-	-	-	-	gi|414590588|tpg|DAA41159.1|/4.86935e-47/TPA: hypothetical protein ZEAMMB73_609255 [Zea mays]
GRMZM2G010338	1753	22.98	84.63	2.22	5.82	1.39046	Up	6.91048e-06	0.000104304	-	K15047|1|0.0|529|sbi:SORBI_06g029970|heterogeneous nuclear ribonucleoprotein U-like protein 1	-	GO:0032559;GO:0032559	-	gi|242077338|ref|XP_002448605.1|/0/hypothetical protein SORBIDRAFT_06g029970 [Sorghum bicolor]
GRMZM2G000741	2286	161.91	596.14	11.94	31.29	1.3899	Up	3.19146e-32	5.29597e-30	-	K15121|1|2e-77|288|smo:SELMODRAFT_413389|solute carrier family 25, member 44	GO:0019866//organelle inner membrane;GO:0031224//intrinsic to membrane	-	GO:0006810//transport;GO:0009987//cellular process	gi|414865103|tpg|DAA43660.1|/2.01807e-148/TPA: hypothetical protein ZEAMMB73_958482 [Zea mays]
GRMZM2G081127	2392.52	75.98	233.08	4.46	11.68	1.38892	Up	2.62284e-10	9.01941e-09	-	-	GO:0043231//intracellular membrane-bounded organelle;GO:0043231//intracellular membrane-bounded organelle	GO:0003676//nucleic acid binding;GO:0003676//nucleic acid binding	-	gi|413946811|gb|AFW79460.1|/0/squamosa promoter-binding protein-like (SBP domain) transcription factor family protein [Zea mays]
GRMZM2G109332	1037.07	28.48	104.14	4.7	12.29	1.38675	Up	9.05796e-07	1.6658e-05	cox2	K02261|1|8e-72|268|osa:6450161|cytochrome c oxidase subunit 2	GO:0031224//intrinsic to membrane;GO:0005746//mitochondrial respiratory chain;GO:0031410//cytoplasmic vesicle;GO:0031224//intrinsic to membrane;GO:0005746//mitochondrial respiratory chain;GO:0031410//cytoplasmic vesicle	GO:0015002//heme-copper terminal oxidase activity;GO:0005506//iron ion binding;GO:0015002//heme-copper terminal oxidase activity;GO:0005506//iron ion binding	GO:0022904//respiratory electron transport chain;GO:0051234//establishment of localization;GO:0022904//respiratory electron transport chain;GO:0051234//establishment of localization	gi|414587696|tpg|DAA38267.1|/3.24449e-72/TPA: putative cytochrome C oxidase subunit II family protein [Zea mays]
GRMZM2G060647	1335.84	316.31	1118.23	39.05	101.6	1.37951	Up	5.02494e-55	1.54217e-52	-	-	-	-	-	gi|414877139|tpg|DAA54270.1|/7.13344e-103/TPA: hypothetical protein ZEAMMB73_458397 [Zea mays]
GRMZM2G701045	936	25.29	91.86	4.66	12.05	1.37063	Up	6.29728e-06	9.57066e-05	-	-	-	-	-	gi|413943890|gb|AFW76539.1|/3.37712e-78/hypothetical protein ZEAMMB73_352289 [Zea mays]
GRMZM2G012262	1365	91	329	11.36	29.24	1.36398	Up	7.49118e-18	6.07424e-16	-	-	GO:0043231//intracellular membrane-bounded organelle;GO:0043231//intracellular membrane-bounded organelle	GO:0003676//nucleic acid binding;GO:0003676//nucleic acid binding	GO:0006259//DNA metabolic process;GO:0006351//transcription, DNA-dependent;GO:0006259//DNA metabolic process;GO:0006351//transcription, DNA-dependent	gi|413926543|gb|AFW66475.1|/5.67202e-150/DNA binding protein isoform 1 [Zea mays]
GRMZM2G105425	1481.06	16	67	2.15	5.48	1.34984	Up	1.95517e-05	0.000262857	-	-	GO:0009536//plastid;GO:0009536//plastid;GO:0009536//plastid	GO:0003676//nucleic acid binding;GO:0003676//nucleic acid binding;GO:0003676//nucleic acid binding	-	gi|212274707|ref|NP_001130102.1|/1.40829e-147/uncharacterized protein LOC100191195 [Zea mays]
GRMZM2G158835	1307	29.36	104.82	3.83	9.74	1.34658	Up	1.77656e-06	3.05829e-05	-	K11294|1|3e-36|150|smo:SELMODRAFT_15428|nucleolin;K12831|5|4e-21|100|mtr:MTR_3g065190|splicing factor 3B subunit 4	GO:0043231//intracellular membrane-bounded organelle	GO:0005488//binding	-	gi|414887732|tpg|DAA63746.1|/6.83575e-105/TPA: hypothetical protein ZEAMMB73_977373 [Zea mays]
GRMZM2G152194	1975.34	50	170.65	4.11	10.39	1.33799	Up	4.56372e-09	1.29739e-07	-	K03847|1|5e-86|315|zma:100282442|alpha-1,6-mannosyltransferase [EC:2.4.1.260]	GO:0005789//endoplasmic reticulum membrane;GO:0005789//endoplasmic reticulum membrane;GO:0005789//endoplasmic reticulum membrane;GO:0005789//endoplasmic reticulum membrane	GO:0000030//mannosyltransferase activity;GO:0000030//mannosyltransferase activity;GO:0000030//mannosyltransferase activity;GO:0000030//mannosyltransferase activity	GO:0043161//proteasomal ubiquitin-dependent protein catabolic process;GO:0006486//protein glycosylation;GO:0006497//protein lipidation;GO:0043161//proteasomal ubiquitin-dependent protein catabolic process;GO:0006486//protein glycosylation;GO:0006497//protein lipidation;GO:0043161//proteasomal ubiquitin-dependent protein catabolic process;GO:0006486//protein glycosylation;GO:0006497//protein lipid…	gi|414586056|tpg|DAA36627.1|/1.03325e-101/TPA: hypothetical protein ZEAMMB73_968947 [Zea mays]
GRMZM2G147399	959.24	251.08	885.39	44.8	113.25	1.33794	Up	1.1328e-43	2.62866e-41	-	-	-	-	-	gi|413953270|gb|AFW85919.1|/1.76142e-19/hypothetical protein ZEAMMB73_224799 [Zea mays]
GRMZM2G050939	1624.2	49	155	4.57	11.53	1.33513	Up	1.64444e-07	3.56926e-06	-	K09191|1|2e-40|163|sbi:SORBI_09g002060|general transcription factor IIIA	GO:0044464//cell part;GO:0044464//cell part;GO:0044464//cell part	GO:0046914//transition metal ion binding;GO:0046914//transition metal ion binding;GO:0046914//transition metal ion binding	-	gi|413942140|gb|AFW74789.1|/4.9287e-160/transcription factor IIIA ES isoform isoform 1 [Zea mays]
GRMZM2G162699	2555.8	24	92	1.71	4.31	1.33369	Up	2.31054e-06	3.87243e-05	-	-	-	-	-	gi|413945897|gb|AFW78546.1|/0/hypothetical protein ZEAMMB73_013693 [Zea mays]
GRMZM2G164963	807.73	24	83	5.04	12.7	1.33333	Up	3.60108e-05	0.000451392	-	-	GO:0009536//plastid;GO:0009536//plastid	-	-	gi|414590002|tpg|DAA40573.1|/2.85747e-57/TPA: hypothetical protein ZEAMMB73_629385 [Zea mays]
GRMZM2G139066	1771.53	177	622	16.88	42.32	1.32602	Up	5.16842e-31	8.28747e-29	-	-	-	-	-	gi|413934102|gb|AFW68653.1|/0/F-box domain containing protein [Zea mays]
GRMZM2G151734	1408.52	31.56	139.8	4.8	12.03	1.32553	Up	9.89888e-11	3.6409e-09	-	-	-	GO:0016791//phosphatase activity;GO:0016791//phosphatase activity	-	gi|413955044|gb|AFW87693.1|/7.56602e-23/hypothetical protein ZEAMMB73_113124 [Zea mays]
GRMZM2G085474	1931.7	14.8	59.06	1.47	3.68	1.32389	Up	5.92494e-05	0.000692505	-	K00626|1|0.0|676|zma:100282283|acetyl-CoA C-acetyltransferase [EC:2.3.1.9]	-	GO:0016746//transferase activity, transferring acyl groups;GO:0016746//transferase activity, transferring acyl groups;GO:0016746//transferase activity, transferring acyl groups;GO:0016746//transferase activity, transferring acyl groups	-	gi|414869150|tpg|DAA47707.1|/1.96387e-57/TPA: hypothetical protein ZEAMMB73_220204, partial [Zea mays]
GRMZM2G179024	2524	43.99	153.86	2.93	7.3	1.317	Up	7.69956e-09	2.13983e-07	-	K12130|1|0.0|1000|zma:100285170|pseudo-response regulator 5	-	GO:0004871//signal transducer activity	GO:0006351//transcription, DNA-dependent;GO:0007165//signal transduction	gi|226497556|ref|NP_001141486.1|/0/uncharacterized protein LOC100273598 [Zea mays]
GRMZM2G332838	425.49	91.65	249.71	30.45	75.71	1.31404	Up	1.38539e-08	3.67488e-07	-	K11254|1|2e-34|141|mtr:MTR_2g096100|histone H4	GO:0000785//chromatin;GO:0031090//organelle membrane;GO:0009536//plastid;GO:0000785//chromatin;GO:0031090//organelle membrane;GO:0009536//plastid;GO:0000785//chromatin;GO:0031090//organelle membrane;GO:0009536//plastid;GO:0000785//chromatin;GO:0031090//organelle membrane;GO:0009536//plastid	GO:0003676//nucleic acid binding;GO:0003676//nucleic acid binding;GO:0003676//nucleic acid binding;GO:0003676//nucleic acid binding	GO:0034728//nucleosome organization;GO:0034728//nucleosome organization;GO:0034728//nucleosome organization;GO:0034728//nucleosome organization	gi|108705888|gb|ABF93683.1|/1.18471e-30/Histone H4, putative, expressed [Oryza sativa Japonica Group]
GRMZM5G844315	209	23.09	80.6	22.15	55.02	1.31265	Up	4.61518e-05	0.000560062	-	-	-	GO:0003676//nucleic acid binding;GO:0046914//transition metal ion binding	-	gi|414884801|tpg|DAA60815.1|/1.47628e-33/TPA: hypothetical protein ZEAMMB73_694550, partial [Zea mays]
GRMZM2G396565	1617	24.45	84.67	2.57	6.32	1.29816	Up	2.67828e-05	0.000347945	-	K12447|1|1e-103|374|zma:100382378|UDP-sugar pyrophosphorylase [EC:2.7.7.64]	GO:0042995//cell projection	GO:0051748//UTP-monosaccharide-1-phosphate uridylyltransferase activity	GO:0019585//glucuronate metabolic process;GO:0009225//nucleotide-sugar metabolic process;GO:0006006//glucose metabolic process;GO:0010038//response to metal ion;GO:0048229//gametophyte development	gi|413933216|gb|AFW67767.1|/0/hypothetical protein ZEAMMB73_263173 [Zea mays]
GRMZM2G029243	2808.22	26	87	1.51	3.71	1.29687	Up	3.91186e-05	0.000483972	-	-	GO:0043231//intracellular membrane-bounded organelle;GO:0043231//intracellular membrane-bounded organelle	GO:0004553//hydrolase activity, hydrolyzing O-glycosyl compounds;GO:0005488//binding;GO:0004553//hydrolase activity, hydrolyzing O-glycosyl compounds	GO:0044238//primary metabolic process;GO:0008152//metabolic process	gi|413946939|gb|AFW79588.1|/0/hypothetical protein ZEAMMB73_786943, partial [Zea mays]
GRMZM2G338916	649	53.15	184.83	14.5	35.61	1.29623	Up	5.24012e-10	1.71125e-08	-	-	-	-	-	gi|414886412|tpg|DAA62426.1|/1.61024e-07/TPA: hypothetical protein ZEAMMB73_632539 [Zea mays]
GRMZM2G046676	1124	42.67	146.93	6.51	15.95	1.29283	Up	3.17196e-08	7.85886e-07	-	K12192|1|9e-55|212|smo:SELMODRAFT_266789|charged multivesicular body protein 2B	GO:0010008//endosome membrane;GO:0010008//endosome membrane	-	GO:0006810//transport;GO:0006810//transport	gi|413933645|gb|AFW68196.1|/7.02682e-108/charged multivesicular body protein 2a [Zea mays]
GRMZM2G075563	1315	81.69	281.26	10.6	25.97	1.29278	Up	1.52231e-14	8.95872e-13	-	-	-	-	-	gi|212722260|ref|NP_001132763.1|/2.84412e-159/uncharacterized protein LOC100194250 [Zea mays]
GRMZM2G034453	2052	35	120.42	2.88	7.05	1.29155	Up	7.44838e-07	1.39679e-05	-	-	-	-	-	gi|293331307|ref|NP_001168604.1|/0/uncharacterized protein LOC100382388 [Zea mays]
GRMZM5G819452	1090	32	110	5.04	12.32	1.28951	Up	2.07816e-06	3.52226e-05	-	K14573|1|8e-137|484|sbi:SORBI_01g004800|nucleolar protein 4	-	GO:0005488//binding	-	gi|413932762|gb|AFW67313.1|/1.92313e-147/hypothetical protein ZEAMMB73_299493 [Zea mays]
GRMZM2G305167	1303.28	23.1	80.19	3.06	7.47	1.28758	Up	4.61518e-05	0.000559823	-	-	GO:0031224//intrinsic to membrane;GO:0043231//intracellular membrane-bounded organelle;GO:0031224//intrinsic to membrane;GO:0043231//intracellular membrane-bounded organelle;GO:0031224//intrinsic to membrane;GO:0043231//intracellular membrane-bounded organelle	GO:0022857//transmembrane transporter activity;GO:0022857//transmembrane transporter activity;GO:0022857//transmembrane transporter activity	GO:0006810//transport;GO:0006810//transport;GO:0006810//transport	gi|413920718|gb|AFW60650.1|/2.56613e-68/hypothetical protein ZEAMMB73_187749 [Zea mays]
GRMZM2G154442	1838.5	67.27	234.13	6.3	15.34	1.28387	Up	1.81045e-12	8.18919e-11	-	-	-	-	-	gi|308044357|ref|NP_001183006.1|/1.81922e-69/hypothetical protein [Zea mays]
GRMZM2G157806	727.4	173.14	522.46	36.88	89.24	1.27485	Up	3.4836e-20	3.30329e-18	-	-	GO:0031410//cytoplasmic vesicle;GO:0031410//cytoplasmic vesicle	-	-	gi|226493249|ref|NP_001152714.1|/6.30532e-42/TPD1 precursor [Zea mays]
GRMZM2G055527	1060	26	88	4.21	10.15	1.26959	Up	2.9314e-05	0.000376205	-	K03873|1|2e-30|131|pop:POPTR_561357|transcription elongation factor B, polypeptide 2	GO:0043231//intracellular membrane-bounded organelle	-	-	gi|226493337|ref|NP_001152246.1|/3.14238e-46/ubiquitin-like protein [Zea mays]
GRMZM2G587327	2535	63.49	214.57	4.22	10.14	1.26474	Up	4.71052e-11	1.80467e-09	-	K06027|1|0.0|1386|zma:100382060|vesicle-fusing ATPase [EC:3.6.4.6]	-	GO:0016462//pyrophosphatase activity;GO:0032559	-	gi|293334399|ref|NP_001168295.1|/0/hypothetical protein [Zea mays]
GRMZM2G089355	1532	34	114	3.77	9	1.25536	Up	2.2585e-06	3.78966e-05	-	K10695|1|4e-115|413|zma:100281596|E3 ubiquitin-protein ligase RNF1/2 [EC:6.3.2.19]	-	GO:0046872//metal ion binding;GO:0016740//transferase activity;GO:0046872//metal ion binding;GO:0016740//transferase activity	-	gi|226496665|ref|NP_001147987.1|/3.63081e-140/ribosomal protein L11 methyltransferase containing protein [Zea mays]
GRMZM2G075459	413	68	227.62	29.93	71.3	1.25231	Up	2.46892e-11	9.77364e-10	-	-	-	-	-	gi|414865076|tpg|DAA43633.1|/2.84581e-21/TPA: hypothetical protein ZEAMMB73_402098, partial [Zea mays]
GRMZM2G160211	1003	26.34	87.6	4.52	10.7	1.24322	Up	3.91186e-05	0.000483762	-	-	-	-	-	gi|413938938|gb|AFW73489.1|/9.91532e-71/hypothetical protein ZEAMMB73_173948 [Zea mays]
GRMZM5G893764	797.21	52	140	9.19	21.72	1.24089	Up	3.2341e-05	0.000410804	-	-	-	-	-	gi|223973691|gb|ACN31033.1|/0/unknown [Zea mays]
GRMZM2G013657	1742.64	302	1002	29.34	69.34	1.24082	Up	1.69075e-44	4.02146e-42	-	-	GO:0043231//intracellular membrane-bounded organelle;GO:0043231//intracellular membrane-bounded organelle;GO:0043231//intracellular membrane-bounded organelle;GO:0043231//intracellular membrane-bounded organelle;GO:0043231//intracellular membrane-bounded organelle;GO:0043231//intracellular membrane-bounded organelle	GO:0003676//nucleic acid binding;GO:0001071//nucleic acid binding transcription factor activity;GO:0003676//nucleic acid binding;GO:0001071//nucleic acid binding transcription factor activity;GO:0003676//nucleic acid binding;GO:0001071//nucleic acid binding transcription factor activity;GO:0003676//nucleic acid binding;GO:0001071//nucleic acid binding transcription factor activity;GO:0003676//nuc…	GO:0006351//transcription, DNA-dependent;GO:0006351//transcription, DNA-dependent;GO:0006351//transcription, DNA-dependent;GO:0006351//transcription, DNA-dependent;GO:0006351//transcription, DNA-dependent;GO:0006351//transcription, DNA-dependent	gi|413945212|gb|AFW77861.1|/0/putative AP2/EREBP transcription factor superfamily protein [Zea mays]
GRMZM2G479260	994	299.85	993.48	51.94	122.47	1.23751	Up	3.46206e-44	8.16646e-42	-	K13993|1|1e-54|211|zma:100283766|HSP20 family protein	-	-	-	gi|413956213|gb|AFW88862.1|/2.76055e-57/class I heat shock protein 3 [Zea mays]
GRMZM2G143244	1605.58	35.65	124.43	3.97	9.36	1.23737	Up	2.30454e-07	4.82938e-06	-	-	GO:0031410//cytoplasmic vesicle;GO:0031410//cytoplasmic vesicle;GO:0031410//cytoplasmic vesicle	-	-	gi|226532896|ref|NP_001141237.1|/0/uncharacterized protein LOC100273324 precursor [Zea mays]
GRMZM2G567452	522	43	142	14.68	34.51	1.23316	Up	1.83974e-07	3.94811e-06	-	K13230|1|3e-69|185|zma:100147731|2,4,7-trihydroxy-1,4-benzoxazin-3-one-glucoside 7-O-methyltransferase [EC:2.1.1.241];K16040|3|2e-07|53.5|vvi:100233030|trans-resveratrol di-O-methyltransferase [EC:2.1.1.240]	-	GO:0005515//protein binding;GO:0008168//methyltransferase activity	GO:0006730//one-carbon metabolic process	gi|187829883|ref|NP_001120719.1|/3.17621e-68/TRIBOA-glucoside O-methyltransferase BX7 [Zea mays]
GRMZM5G878044	709	31	102	7.64	17.9	1.22832	Up	1.11696e-05	0.000160122	-	-	-	-	-	gi|414883606|tpg|DAA59620.1|/4.08587e-58/TPA: hypothetical protein ZEAMMB73_174899 [Zea mays]
GRMZM2G011608	3076.59	35	115	1.91	4.47	1.2267	Up	3.10356e-06	5.05316e-05	-	-	-	-	-	gi|414882102|tpg|DAA59233.1|/0/TPA: hypothetical protein ZEAMMB73_861907 [Zea mays]
GRMZM2G330635	1335.99	549	1805	70.22	163.97	1.22348	Up	1.64266e-77	7.44202e-75	-	K00799|1|2e-57|221|sbi:SORBI_01g030930|glutathione S-transferase [EC:2.5.1.18]	GO:0044424//intracellular part;GO:0044424//intracellular part;GO:0044424//intracellular part	GO:0016765//transferase activity, transferring alkyl or aryl (other than methyl) groups;GO:0016765//transferase activity, transferring alkyl or aryl (other than methyl) groups;GO:0016765//transferase activity, transferring alkyl or aryl (other than methyl) groups;GO:0016740//transferase activity	-	gi|195636670|gb|ACG37803.1|/1.91429e-95/glutathione S-transferase GSTU6 [Zea mays]
GRMZM2G082502	2052	29	95	2.39	5.57	1.22067	Up	2.44644e-05	0.000320893	-	K01285|1|6e-24|110|pop:POPTR_770625|lysosomal Pro-X carboxypeptidase [EC:3.4.16.2]	GO:0031410//cytoplasmic vesicle;GO:0031410//cytoplasmic vesicle	GO:0008238//exopeptidase activity;GO:0008238//exopeptidase activity	GO:0019538//protein metabolic process;GO:0019538//protein metabolic process	gi|413933853|gb|AFW68404.1|/0/putative serine peptidase S28 family protein [Zea mays]
GRMZM5G841343	589.03	76	245	22.48	52.32	1.21872	Up	1.83935e-11	7.42556e-10	-	-	-	-	-	gi|413945317|gb|AFW77966.1|/2.86754e-13/hypothetical protein ZEAMMB73_735651, partial [Zea mays]
GRMZM2G065171	1158	31	101	4.58	10.63	1.21472	Up	1.4796e-05	0.000205802	-	K11147|1|1e-16|85.9|vcn:VOLCADRAFT_107595|dehydrogenase/reductase SDR family member 4 [EC:1.1.-.-];K00065|2|3e-15|81.3|rcu:RCOM_0389080|2-deoxy-D-gluconate 3-dehydrogenase [EC:1.1.1.125];K00059|4|1e-14|79.0|rcu:RCOM_1081890|3-oxoacyl-[acyl-carrier protein] reductase [EC:1.1.1.100];K11165|5|5e-14|77.0|cre:CHLREDRAFT_141876|dehydrogenase/reductase SDR family member 7 [EC:1.1.-.-]	GO:0044464//cell part	GO:0003824//catalytic activity	GO:0008152//metabolic process	gi|212275576|ref|NP_001130821.1|/5.00289e-149/uncharacterized protein LOC100191925 [Zea mays]
GRMZM2G393062	1008	56.17	182.94	9.59	22.23	1.21291	Up	5.65828e-09	1.59269e-07	-	-	-	-	-	gi|414864341|tpg|DAA42898.1|/3.55167e-60/TPA: hypothetical protein ZEAMMB73_612936 [Zea mays]
GRMZM2G021921	2146	32	104	2.52	5.82	1.2076	Up	1.15094e-05	0.000164498	-	K10891|1|0.0|661|sbi:SORBI_02g003260|fanconi anemia group D2 protein	-	-	-	gi|414592055|tpg|DAA42626.1|/0/TPA: hypothetical protein ZEAMMB73_497165 [Zea mays]
GRMZM2G050329	2598	28.79	92.6	1.86	4.27	1.19893	Up	3.14656e-05	0.000401113	-	K12307|1|1e-06|53.9|cme:CMP231C|MFS transporter, ceroid-lipofuscinosis neuronal protein 7	GO:0044464//cell part	-	GO:0006810//transport	gi|413953407|gb|AFW86056.1|/0/hypothetical protein ZEAMMB73_402563 [Zea mays]
GRMZM2G440313	2699	41.04	131.83	2.55	5.85	1.19794	Up	1.2084e-06	2.15969e-05	-	-	-	-	-	gi|226531696|ref|NP_001144345.1|/0/uncharacterized protein LOC100277248 [Zea mays]
GRMZM2G126190	1516.11	63.14	204.39	7.11	16.31	1.19784	Up	7.6922e-10	2.46964e-08	-	K10355|1|0.0|751|osa:4349863|actin, other eukaryote;K05692|2|0.0|746|bdi:100834364|actin beta/gamma 1	GO:0030312//external encapsulating structure;GO:0031981//nuclear lumen;GO:0043232;GO:0016020//membrane;GO:0030312//external encapsulating structure;GO:0031981//nuclear lumen;GO:0043232;GO:0016020//membrane;GO:0030312//external encapsulating structure;GO:0031981//nuclear lumen;GO:0043232;GO:0016020//membrane	GO:0005198//structural molecule activity;GO:0032559;GO:0005198//structural molecule activity;GO:0032559;GO:0005198//structural molecule activity;GO:0032559	GO:0009314//response to radiation;GO:0009725//response to hormone stimulus;GO:0009913//epidermal cell differentiation;GO:0048588//developmental cell growth;GO:0006950//response to stress;GO:0009314//response to radiation;GO:0009725//response to hormone stimulus;GO:0009913//epidermal cell differentiation;GO:0048588//developmental cell growth;GO:0006950//response to stress;GO:0009314//response to r…	gi|226493041|ref|NP_001150248.1|/0/LOC100283878 [Zea mays]
GRMZM2G122805	1332	60	193	7.68	17.59	1.19558	Up	2.77934e-09	8.19503e-08	-	K07976|1|7e-114|409|osa:4348493|Rab family, other	GO:0031410//cytoplasmic vesicle	GO:0032561//guanyl ribonucleotide binding	GO:0035556//intracellular signal transduction;GO:0006810//transport	gi|226532614|ref|NP_001149604.1|/4.39695e-115/LOC100283230 [Zea mays]
GRMZM2G031213	1493.63	142.64	448.99	15.89	36.38	1.19503	Up	4.86716e-19	4.14682e-17	-	K15170|1|3e-38|157|zma:100193632|mediator of RNA polymerase II transcription subunit 27	GO:0031410//cytoplasmic vesicle;GO:0031410//cytoplasmic vesicle;GO:0031410//cytoplasmic vesicle;GO:0031410//cytoplasmic vesicle;GO:0031410//cytoplasmic vesicle	-	-	gi|414880917|tpg|DAA58048.1|/5.06911e-38/TPA: hypothetical protein ZEAMMB73_885358 [Zea mays]
GRMZM2G138429	1742.11	38.66	114.87	3.48	7.95	1.19187	Up	2.17962e-05	0.000289756	-	-	GO:0031410//cytoplasmic vesicle;GO:0043231//intracellular membrane-bounded organelle;GO:0031410//cytoplasmic vesicle;GO:0031410//cytoplasmic vesicle;GO:0031410//cytoplasmic vesicle;GO:0043231//intracellular membrane-bounded organelle;GO:0031410//cytoplasmic vesicle;GO:0016020//membrane;GO:0031410//cytoplasmic vesicle;GO:0043231//intracellular membrane-bounded organelle	-	GO:0022415;GO:0022415;GO:0022415	gi|413955146|gb|AFW87795.1|/2.40897e-92/hypothetical protein ZEAMMB73_665682 [Zea mays]
GRMZM2G135782	1403.99	47	152	5.76	13.12	1.18763	Up	1.19238e-07	2.65054e-06	-	K14773|1|5e-134|476|zma:100272500|U3 small nucleolar RNA-associated protein 23	-	-	-	gi|414886476|tpg|DAA62490.1|/5.04866e-154/TPA: hypothetical protein ZEAMMB73_597462 [Zea mays]
GRMZM5G829563	1629	32	102	3.33	7.56	1.18286	Up	2.00374e-05	0.000268249	-	-	GO:0009536//plastid	-	-	gi|226508414|ref|NP_001142227.1|/4.44299e-168/uncharacterized protein LOC100274395 [Zea mays]
GRMZM2G398736	911	40.51	128.93	7.68	17.4	1.17991	Up	1.55141e-06	2.70993e-05	-	K10842|1|2e-74|277|zma:100284506|CDK-activating kinase assembly factor MAT1	GO:0043231//intracellular membrane-bounded organelle;GO:0043231//intracellular membrane-bounded organelle	GO:0016772//transferase activity, transferring phosphorus-containing groups;GO:0016772//transferase activity, transferring phosphorus-containing groups	GO:0006796//phosphate-containing compound metabolic process;GO:0006796//phosphate-containing compound metabolic process	gi|226528533|ref|NP_001150873.1|/2.39738e-73/CDK-activating kinase assembly factor MAT1 family protein [Zea mays]
GRMZM2G349895	2337	28	89	2.02	4.57	1.17784	Up	7.27452e-05	0.000823599	-	-	-	-	-	gi|413943328|gb|AFW75977.1|/1.52731e-50/hypothetical protein ZEAMMB73_594064 [Zea mays]
GRMZM2G075463	454	28	89	11.12	25.14	1.17683	Up	7.27452e-05	0.000823926	-	-	-	-	-	gi|413953041|gb|AFW85690.1|/5.94719e-33/hypothetical protein ZEAMMB73_368182 [Zea mays]
GRMZM2G358416	393	61.62	195.29	28.64	64.6	1.1735	Up	2.85104e-09	8.38047e-08	-	K12833|1|6e-62|233|zma:100382393|pre-mRNA branch site protein p14	-	GO:0005488//binding	-	gi|242037653|ref|XP_002466221.1|/8.36849e-61/hypothetical protein SORBIDRAFT_01g003790 [Sorghum bicolor]
GRMZM2G443888	1019	29.65	93.69	5	11.26	1.17121	Up	4.27972e-05	0.000523358	-	-	GO:0044464//cell part	GO:0005488//binding	-	gi|226510530|ref|NP_001143366.1|/6.15933e-68/uncharacterized protein LOC100275996 [Zea mays]
GRMZM5G833389	2040	165.12	520.5	13.67	30.67	1.16581	Up	8.1694e-22	8.96812e-20	-	K15633|1|0.0|1122|zma:542578|2,3-bisphosphoglycerate-independent phosphoglycerate mutase [EC:5.4.2.1]	GO:0044424//intracellular part;GO:0044424//intracellular part	GO:0046914//transition metal ion binding;GO:0016868//intramolecular transferase activity, phosphotransferases;GO:0046914//transition metal ion binding;GO:0016868//intramolecular transferase activity, phosphotransferases	GO:0050896//response to stimulus;GO:0006007//glucose catabolic process;GO:0050896//response to stimulus;GO:0006007//glucose catabolic process	gi|413952115|gb|AFW84764.1|/0/phosphoglycerate mutase1 [Zea mays]
GRMZM2G419938	890	69.73	219.81	13.55	30.4	1.16578	Up	3.9694e-10	1.32508e-08	-	-	-	-	-	gi|195646986|gb|ACG42961.1|/1.1593e-24/hypothetical protein [Zea mays]
GRMZM2G067067	1127.99	29.11	92.46	4.47	10	1.16165	Up	5.64114e-05	0.000663683	-	-	-	GO:0046872//metal ion binding;GO:0046872//metal ion binding;GO:0046872//metal ion binding;GO:0046872//metal ion binding;GO:0046872//metal ion binding;GO:0046872//metal ion binding;GO:0046872//metal ion binding;GO:0046872//metal ion binding;GO:0046872//metal ion binding	-	gi|226508514|ref|NP_001149792.1|/2.71883e-133/DCN1-like protein 4 [Zea mays]
GRMZM2G063949	1708	54.22	170.35	5.38	12.03	1.16096	Up	4.7445e-08	1.1332e-06	-	K12449|1|0.0|776|sbi:SORBI_03g047200|UDP-apiose/xylose synthase	GO:0005576//extracellular region	GO:0016831//carboxy-lyase activity;GO:0048037//cofactor binding;GO:0016836//hydro-lyase activity	GO:0009225//nucleotide-sugar metabolic process	gi|195639652|gb|ACG39294.1|/0/bifunctional polymyxin resistance arnA protein [Zea mays]
GRMZM2G041765	1692.13	29	95	3.03	6.77	1.15984	Up	2.44644e-05	0.000320745	-	-	-	-	-	gi|413953575|gb|AFW86224.1|/2.25639e-84/hypothetical protein ZEAMMB73_904543 [Zea mays]
GRMZM2G052720	1414	39.39	123.63	4.74	10.59	1.15974	Up	3.43818e-06	5.52548e-05	-	K09286|1|7e-11|67.0|aly:ARALYDRAFT_897795|EREBP-like factor	GO:0043231//intracellular membrane-bounded organelle	GO:0003676//nucleic acid binding;GO:0001071//nucleic acid binding transcription factor activity	GO:0006351//transcription, DNA-dependent	gi|226495787|ref|NP_001150172.1|/6.13622e-54/ethylene-responsive transcription factor 3 [Zea mays]
GRMZM2G056079	2224.19	65.95	198.29	4.79	10.7	1.15951	Up	1.15476e-08	3.10642e-07	-	-	GO:0031224//intrinsic to membrane	GO:0001727//lipid kinase activity;GO:0032559;GO:0001727//lipid kinase activity;GO:0032559;GO:0001727//lipid kinase activity;GO:0032559;GO:0001727//lipid kinase activity;GO:0032559	GO:0046488//phosphatidylinositol metabolic process;GO:0019538//protein metabolic process;GO:0046488//phosphatidylinositol metabolic process;GO:0019538//protein metabolic process;GO:0046488//phosphatidylinositol metabolic process;GO:0019538//protein metabolic process;GO:0046488//phosphatidylinositol metabolic process;GO:0019538//protein metabolic process	gi|413948436|gb|AFW81085.1|/3.14724e-107/hypothetical protein ZEAMMB73_434316, partial [Zea mays]
GRMZM2G125784	1385	111.05	348.06	13.66	30.47	1.15743	Up	5.98334e-15	3.72062e-13	-	-	GO:0043231//intracellular membrane-bounded organelle	-	-	gi|226528591|ref|NP_001145302.1|/3.39063e-41/hypothetical protein [Zea mays]
GRMZM2G361064	1453	32.99	103.33	3.86	8.61	1.15741	Up	1.5202e-05	0.000210323	EXPA5	-	GO:0031410//cytoplasmic vesicle;GO:0031410//cytoplasmic vesicle	-	-	gi|162462863|ref|NP_001105042.1|/1.82408e-118/alpha-expansin 5 precursor [Zea mays]
GRMZM2G056377	1163.56	77.37	239.88	11.34	25.12	1.14742	Up	1.60122e-10	5.67726e-09	-	-	-	-	-	gi|195658603|gb|ACG48769.1|/1.66107e-48/hypothetical protein [Zea mays]
GRMZM5G824137	1160.28	43	123	5.85	12.92	1.1431	Up	2.81916e-05	0.000363763	-	K15363|1|0.0|657|zma:100217231|fanconi-associated nuclease 1	GO:0043231//intracellular membrane-bounded organelle;GO:0043231//intracellular membrane-bounded organelle	GO:0046914//transition metal ion binding;GO:0016817//hydrolase activity, acting on acid anhydrides;GO:0003676//nucleic acid binding;GO:0046914//transition metal ion binding;GO:0016817//hydrolase activity, acting on acid anhydrides;GO:0003676//nucleic acid binding	GO:0006259//DNA metabolic process;GO:0006259//DNA metabolic process	gi|219363657|ref|NP_001137059.1|/0/uncharacterized protein LOC100217231 [Zea mays]
GRMZM2G380515	2314.76	170	405	9.54	20.99	1.13764	Up	2.57436e-09	7.66188e-08	-	K09191|1|4e-164|577|bdi:100827085|general transcription factor IIIA	GO:0044464//cell part	GO:0046914//transition metal ion binding	-	gi|242082594|ref|XP_002441722.1|/0/hypothetical protein SORBIDRAFT_08g001305 [Sorghum bicolor]
GRMZM2G152889	1961.67	38.21	117.65	3.28	7.21	1.1363	Up	9.90018e-06	0.000143729	-	K04424|1|2e-46|176|aly:ARALYDRAFT_909157|sterile alpha motif and leucine zipper containing kinase AZK [EC:2.7.11.25];K14510|3|7e-46|172|ppp:PHYPADRAFT_30352|serine/threonine-protein kinase CTR1 [EC:2.7.11.1]	-	GO:0031406//carboxylic acid binding;GO:0004672//protein kinase activity;GO:0032559;GO:0031406//carboxylic acid binding;GO:0004713//protein tyrosine kinase activity;GO:0032559;GO:0031406//carboxylic acid binding;GO:0004672//protein kinase activity;GO:0032559	GO:0006464//cellular protein modification process;GO:0006464//cellular protein modification process;GO:0006464//cellular protein modification process	gi|414878475|tpg|DAA55606.1|/0/TPA: putative ACT-domain containing protein kinase family protein [Zea mays]
GRMZM2G119117	1076	200	616	31.91	69.95	1.13232	Up	1.72046e-24	2.19221e-22	-	-	-	-	-	gi|414588600|tpg|DAA39171.1|/3.80255e-39/TPA: hypothetical protein ZEAMMB73_423840 [Zea mays]
GRMZM2G477113	1144	44.1	135.7	6.6	14.46	1.13153	Up	2.18388e-06	3.67959e-05	-	-	GO:0031410//cytoplasmic vesicle;GO:0031410//cytoplasmic vesicle	GO:0046914//transition metal ion binding;GO:0046872//metal ion binding	-	gi|413920353|gb|AFW60285.1|/1.09928e-156/hypothetical protein ZEAMMB73_319798 [Zea mays]
GRMZM2G090657	721	30.71	94.47	7.44	16.29	1.13061	Up	5.75046e-05	0.000674321	-	-	-	-	-	gi|414868632|tpg|DAA47189.1|/1.24961e-33/TPA: hypothetical protein ZEAMMB73_855183 [Zea mays]
GRMZM2G051135	779	67	206	14.96	32.74	1.12994	Up	4.17282e-09	1.19459e-07	-	K03627|1|7e-61|176|zma:100285046|putative transcription factor	GO:0031981//nuclear lumen	GO:0003712//transcription cofactor activity;GO:0001071//nucleic acid binding transcription factor activity;GO:0003677//DNA binding	GO:0000160//two-component signal transduction system (phosphorelay);GO:0009725//response to hormone stimulus;GO:0006355//regulation of transcription, DNA-dependent;GO:0006950//response to stress	gi|226499370|ref|NP_001151413.1|/8.7952e-60/endothelial differentiation-related factor 1 [Zea mays]
GRMZM2G116196	3067.87	52.42	159.43	2.84	6.21	1.1287	Up	2.94254e-07	6.01188e-06	-	-	-	-	-	gi|308081253|ref|NP_001182872.1|/0/uncharacterized protein LOC100501140 [Zea mays]
GRMZM2G156565	1977.45	29.46	92.53	2.58	5.63	1.12576	Up	5.64114e-05	0.000663956	-	K01883|1|0.0|429|zma:100192902|cysteinyl-tRNA synthetase [EC:6.1.1.16]	GO:0043231//intracellular membrane-bounded organelle;GO:0043231//intracellular membrane-bounded organelle	GO:0004812//aminoacyl-tRNA ligase activity;GO:0032559;GO:0004812//aminoacyl-tRNA ligase activity;GO:0032559	GO:0006418//tRNA aminoacylation for protein translation;GO:0006418//tRNA aminoacylation for protein translation	gi|414873768|tpg|DAA52325.1|/0/TPA: chloroplast protein synthesis1 [Zea mays]
GRMZM2G114322	1339	65	198	8.28	17.95	1.11628	Up	1.15476e-08	3.10349e-07	-	-	GO:0031410//cytoplasmic vesicle;GO:0031410//cytoplasmic vesicle	-	-	gi|414590226|tpg|DAA40797.1|/2.50092e-126/TPA: hypothetical protein ZEAMMB73_187022 [Zea mays]
GRMZM2G052200	1174	48.2	146.64	7.03	15.22	1.11437	Up	1.0405e-06	1.88201e-05	-	-	-	-	-	gi|413949901|gb|AFW82550.1|/9.7809e-22/hypothetical protein ZEAMMB73_183652 [Zea mays]
GRMZM2G004079	1597.94	26.74	85.84	3	6.49	1.11326	Up	6.91658e-05	0.000789021	-	K13412|1|4e-34|144|pop:POPTR_287767|calcium-dependent protein kinase [EC:2.7.11.1]	-	GO:0004672//protein kinase activity;GO:0032559;GO:0004674//protein serine/threonine kinase activity;GO:0032559;GO:0004672//protein kinase activity;GO:0032559	GO:0006464//cellular protein modification process;GO:0006464//cellular protein modification process;GO:0006464//cellular protein modification process	gi|414869953|tpg|DAA48510.1|/6.76624e-129/TPA: putative calcium-dependent protein kinase family protein [Zea mays]
GRMZM5G871463	1050.12	57.51	174.03	9.37	20.27	1.11323	Up	8.44916e-08	1.93855e-06	-	K02603|1|7e-11|66.6|smo:SELMODRAFT_51018|origin recognition complex subunit 1	-	GO:0003676//nucleic acid binding;GO:0046914//transition metal ion binding;GO:0003676//nucleic acid binding;GO:0046914//transition metal ion binding	-	gi|226494059|ref|NP_001152591.1|/9.1332e-43/LOC100286231 [Zea mays]
GRMZM2G042171	2379.22	89	259	6.04	13.05	1.11143	Up	4.8951e-10	1.60778e-08	-	-	GO:0031224//intrinsic to membrane;GO:0031224//intrinsic to membrane	GO:0015291//secondary active transmembrane transporter activity;GO:0015291//secondary active transmembrane transporter activity	GO:0015698//inorganic anion transport;GO:0015698//inorganic anion transport	gi|414865433|tpg|DAA43990.1|/0/TPA: hypothetical protein ZEAMMB73_140973 [Zea mays]
GRMZM5G877077	1719	36	109.65	3.56	7.69	1.11111	Up	2.7876e-05	0.00036018	-	-	-	-	-	gi|226531263|ref|NP_001142398.1|/0/uncharacterized protein LOC100274572 [Zea mays]
GRMZM2G175000	1531.18	45	132	4.83	10.43	1.11064	Up	8.0198e-06	0.000119531	-	K09191|1|8e-14|76.3|pop:POPTR_287860|general transcription factor IIIA	GO:0044464//cell part;GO:0044464//cell part	GO:0046914//transition metal ion binding;GO:0046914//transition metal ion binding	-	gi|413942371|gb|AFW75020.1|/3.5134e-112/hypothetical protein ZEAMMB73_149684, partial [Zea mays]
GRMZM5G825978	1639	103	312	10.66	22.99	1.1088	Up	9.70058e-13	4.56888e-11	-	-	-	-	-	gi|293335091|ref|NP_001168220.1|/9.16414e-105/uncharacterized protein LOC100381979 [Zea mays]
GRMZM2G113332	1248	44	133	6.02	12.96	1.10623	Up	3.69036e-06	5.87453e-05	-	K07213|1|2e-19|59.3|zma:100276197|copper chaperone	GO:0009536//plastid;GO:0009536//plastid	GO:0005507//copper ion binding;GO:0005507//copper ion binding	GO:0006979//response to oxidative stress;GO:0032502//developmental process;GO:0030003//cellular cation homeostasis;GO:0006970//response to osmotic stress;GO:0034755//iron ion transmembrane transport;GO:0006979//response to oxidative stress;GO:0032502//developmental process;GO:0030003//cellular cation homeostasis;GO:0006970//response to osmotic stress;GO:0034755//iron ion transmembrane transport	gi|413937113|gb|AFW71664.1|/3.56852e-39/hypothetical protein ZEAMMB73_148745 [Zea mays]
GRMZM2G058900	1707.87	79.47	194.8	6.4	13.76	1.10434	Up	1.61722e-05	0.000222023	-	-	GO:0043231//intracellular membrane-bounded organelle;GO:0043231//intracellular membrane-bounded organelle;GO:0043231//intracellular membrane-bounded organelle;GO:0044464//cell part	-	GO:0009987//cellular process;GO:0009987//cellular process;GO:0009987//cellular process;GO:0009987//cellular process	gi|413943437|gb|AFW76086.1|/4.70222e-13/hypothetical protein ZEAMMB73_702542, partial [Zea mays]
GRMZM2G336789	1249.46	47.21	137.44	6.24	13.38	1.10046	Up	6.23804e-06	9.49073e-05	-	K12394|1|2e-75|280|pop:POPTR_731013|AP-1 complex subunit sigma 1/2;K11827|2|8e-38|155|cre:CHLREDRAFT_195448|AP-2 complex subunit sigma-1	GO:0043234//protein complex;GO:0031410//cytoplasmic vesicle;GO:0043234//protein complex;GO:0031410//cytoplasmic vesicle;GO:0043234//protein complex;GO:0031410//cytoplasmic vesicle	GO:0022892;GO:0022892;GO:0022892	GO:0015031//protein transport;GO:0015031//protein transport;GO:0015031//protein transport	gi|414873202|tpg|DAA51759.1|/1.33931e-84/TPA: AP-1 complex subunit sigma-2 [Zea mays]
GRMZM2G050460	844.44	58	158.94	10.84	23.22	1.099	Up	7.285e-06	0.000109494	-	K02908|1|6e-38|154|zma:100502201|large subunit ribosomal protein L30e	GO:0030529//ribonucleoprotein complex;GO:0030529//ribonucleoprotein complex	GO:0005198//structural molecule activity;GO:0005198//structural molecule activity	GO:0010467//gene expression;GO:0010467//gene expression	gi|413934888|gb|AFW69439.1|/2.37652e-56/hypothetical protein ZEAMMB73_416870, partial [Zea mays]
GRMZM2G162525	3635	86.51	259.51	3.99	8.52	1.09446	Up	1.06737e-10	3.89077e-09	-	K11596|1|0.0|1059|sbi:SORBI_06g025560|argonaute	-	GO:0005488//binding	-	gi|413950281|gb|AFW82930.1|/0/12-oxo-phytodienoic acid reductase [Zea mays]
GRMZM2G009320	1204.72	33	99	4.69	10	1.09234	Up	7.7747e-05	0.000871585	-	-	-	-	-	gi|226505288|ref|NP_001145048.1|/8.42937e-97/uncharacterized protein LOC100278234 [Zea mays]
GRMZM2G014022	1351	285	853	35.96	76.6	1.09095	Up	1.75181e-31	2.85715e-29	-	-	-	-	-	gi|413918269|gb|AFW58201.1|/4.61142e-120/hypothetical protein ZEAMMB73_575911 [Zea mays]
GRMZM2G428098	645	101.45	303.6	27.64	58.87	1.09078	Up	3.41308e-12	1.49411e-10	-	-	-	-	-	gi|413943890|gb|AFW76539.1|/6.19452e-69/hypothetical protein ZEAMMB73_352289 [Zea mays]
GRMZM2G073535	790.32	286	787.03	58.14	123.22	1.08363	Up	2.23484e-24	2.82242e-22	-	K03113|1|8e-57|173|zma:100286322|translation initiation factor 1	-	GO:0008135//translation factor activity, nucleic acid binding;GO:0008135//translation factor activity, nucleic acid binding;GO:0008135//translation factor activity, nucleic acid binding;GO:0008135//translation factor activity, nucleic acid binding;GO:0008135//translation factor activity, nucleic acid binding	GO:0006412//translation;GO:0006412//translation;GO:0006412//translation;GO:0006412//translation;GO:0006412//translation	gi|223972959|gb|ACN30667.1|/3.6934e-64/unknown [Zea mays]
GRMZM2G075145	1665.34	49.51	147.18	5.04	10.67	1.08206	Up	1.36106e-06	2.40244e-05	-	K11268|1|1e-179|627|zma:100280348|N-acetyltransferase [EC:2.3.1.-]	-	-	-	gi|414586531|tpg|DAA37102.1|/1.97398e-179/TPA: putative N-acetyltransferase ESCO1 family protein isoform 1 [Zea mays]
GRMZM2G006937	2794	44	131	2.65	5.61	1.08201	Up	6.19322e-06	9.42757e-05	-	K01853|1|0.0|966|vvi:100243389|cycloartenol synthase [EC:5.4.99.8]	GO:0043231//intracellular membrane-bounded organelle	GO:0016853//isomerase activity	-	gi|413935564|gb|AFW70115.1|/0/cycloartenol synthase [Zea mays]
GRMZM2G138676	2064.26	38	112	3.08	6.52	1.08194	Up	3.65226e-05	0.000456405	gpm645	K00924|1|0.0|789|osa:4334738|[EC:2.7.1.-];K03083|2|0.0|785|bdi:100825794|glycogen synthase kinase 3 beta [EC:2.7.11.26]	GO:0044444//cytoplasmic part;GO:0044444//cytoplasmic part;GO:0044444//cytoplasmic part;GO:0044444//cytoplasmic part;GO:0016020//membrane;GO:0044444//cytoplasmic part	GO:0004672//protein kinase activity;GO:0032559;GO:0004672//protein kinase activity;GO:0032559;GO:0004672//protein kinase activity;GO:0032559;GO:0004672//protein kinase activity;GO:0032559;GO:0004672//protein kinase activity;GO:0032559	GO:0006464//cellular protein modification process;GO:0006970//response to osmotic stress;GO:0006464//cellular protein modification process;GO:0006970//response to osmotic stress;GO:0006464//cellular protein modification process;GO:0006970//response to osmotic stress;GO:0006464//cellular protein modification process;GO:0006970//response to osmotic stress;GO:0006464//cellular protein modification p…	gi|194691264|gb|ACF79716.1|/0/unknown [Zea mays]
GRMZM2G468348	1878	38.47	114.41	3.47	7.34	1.08084	Up	2.17962e-05	0.000289622	-	-	-	-	-	gi|413948146|gb|AFW80795.1|/0/hypothetical protein ZEAMMB73_432124 [Zea mays]
GRMZM2G047788	1469.87	39	116	4.53	9.55	1.07599	Up	2.19168e-05	0.000290953	-	K10597|1|6e-10|63.9|sbi:SORBI_01g032170|ubiquitin conjugation factor E4 B [EC:6.3.2.19];K15152|2|4e-06|51.2|sbi:SORBI_07g002720|mediator of RNA polymerase II transcription subunit 21	-	-	-	gi|226528348|ref|NP_001140303.1|/2.15739e-89/uncharacterized protein LOC100272348 [Zea mays]
GRMZM2G012926	3477	43	127	2.07	4.36	1.0747	Up	1.02992e-05	0.000149066	-	-	-	-	-	gi|413934378|gb|AFW68929.1|/0/hypothetical protein ZEAMMB73_492157, partial [Zea mays]
GRMZM2G425482	1193	341	1006.01	48.91	102.68	1.06995	Up	9.0685e-36	1.68073e-33	-	-	-	-	-	gi|413955432|gb|AFW88081.1|/1.59971e-81/hypothetical protein ZEAMMB73_682431 [Zea mays]
GRMZM2G010056	1096	37	109	5.79	12.14	1.06813	Up	4.70868e-05	0.00056923	-	K06442|1|3e-160|562|zma:100285994|23S rRNA (cytidine1920-2'-O)/16S rRNA (cytidine1409-2'-O)-methyltransferase [EC:2.1.1.226 2.1.1.227]	GO:0043231//intracellular membrane-bounded organelle;GO:0043231//intracellular membrane-bounded organelle;GO:0043231//intracellular membrane-bounded organelle	GO:0003676//nucleic acid binding;GO:0016741;GO:0003676//nucleic acid binding;GO:0016741;GO:0003676//nucleic acid binding;GO:0016741	GO:0006730//one-carbon metabolic process;GO:0001897;GO:0006730//one-carbon metabolic process;GO:0001897;GO:0006730//one-carbon metabolic process;GO:0001897	gi|413920637|gb|AFW60569.1|/3.77104e-49/hemolysin A [Zea mays]
GRMZM2G146173	925	65	191	12.13	25.37	1.06454	Up	6.9114e-08	1.6156e-06	-	-	-	-	-	gi|226507667|ref|NP_001149066.1|/2.84549e-12/zinc finger protein hangover [Zea mays]
GRMZM2G078723	973	469	1378	83.06	173.68	1.06421	Up	5.76188e-48	1.52274e-45	-	K14496|1|9e-06|49.3|sbi:SORBI_10g022200|abscisic acid receptor PYR/PYL family	-	-	-	gi|413948974|gb|AFW81623.1|/5.32157e-74/lachrymatory factor synthase [Zea mays]
GRMZM2G112247	1238.49	976	2720	127.77	267.13	1.06399	Up	1.36581e-82	6.83913e-80	-	-	-	-	-	gi|413938175|gb|AFW72726.1|/5.61445e-116/cellular retinaldehyde-binding/triple function [Zea mays]
GRMZM2G322634	1168	131	384	19.2	40.06	1.06106	Up	2.05438e-14	1.18457e-12	-	-	GO:0043231//intracellular membrane-bounded organelle	-	-	gi|413919153|gb|AFW59085.1|/1.34421e-117/hypothetical protein ZEAMMB73_410845 [Zea mays]
GRMZM2G162758	2271	50	146	3.71	7.71	1.05531	Up	2.93436e-06	4.79957e-05	-	K15402|1|0.0|836|bdi:100824104|cytochrome P450, family 86, subfamily B, polypeptide 1 (fatty acid omega-hydroxylase) [EC:1.14.-.-]	-	GO:0016712//oxidoreductase activity, acting on paired donors, with incorporation or reduction of molecular oxygen, reduced flavin or flavoprotein as one donor, and incorporation of one atom of oxygen;GO:0005506//iron ion binding	GO:0008152//metabolic process	gi|414870996|tpg|DAA49553.1|/0/TPA: putative cytochrome P450 superfamily protein [Zea mays]
GRMZM2G078501	1411.29	49	148	6.13	12.71	1.05201	Up	1.05067e-06	1.89799e-05	-	-	-	-	-	gi|414879779|tpg|DAA56910.1|/1.12907e-46/TPA: hypothetical protein ZEAMMB73_532697 [Zea mays]
GRMZM2G364145	1617.13	113.44	324.1	11.68	24.21	1.05156	Up	7.39882e-12	3.14252e-10	-	-	-	-	-	gi|414865674|tpg|DAA44231.1|/5.50812e-45/TPA: hypothetical protein ZEAMMB73_783266 [Zea mays]
GRMZM2G467069	1971.61	53.47	168.07	4.95	10.25	1.05012	Up	4.64574e-08	1.11147e-06	-	K00279|1|1e-74|278|zma:542056|cytokinin dehydrogenase [EC:1.5.99.12]	GO:0031410//cytoplasmic vesicle	GO:0016773//phosphotransferase activity, alcohol group as acceptor;GO:0032559;GO:0016773//phosphotransferase activity, alcohol group as acceptor;GO:0032559;GO:0016773//phosphotransferase activity, alcohol group as acceptor;GO:0032559;GO:0016645//oxidoreductase activity, acting on the CH-NH group of donors	GO:0006796//phosphate-containing compound metabolic process;GO:0006007//glucose catabolic process;GO:0006796//phosphate-containing compound metabolic process;GO:0006007//glucose catabolic process;GO:0006796//phosphate-containing compound metabolic process;GO:0006007//glucose catabolic process;GO:0006091//generation of precursor metabolites and energy	gi|413951345|gb|AFW83994.1|/0/hypothetical protein ZEAMMB73_545591 [Zea mays]
GRMZM2G117153	1969	62.14	180.37	5.33	11.02	1.04792	Up	2.4058e-07	5.01947e-06	-	K06119|1|0.0|831|zma:100283642|sulfoquinovosyltransferase [EC:2.4.1.-]	-	GO:0003824//catalytic activity	GO:0008152//metabolic process	gi|413956230|gb|AFW88879.1|/0/glycosyl transferase, group 1 family protein [Zea mays]
GRMZM2G012178	1770	52	150	4.98	10.22	1.03718	Up	2.9289e-06	4.79339e-05	-	K15707|1|7e-117|419|rcu:RCOM_0774230|RING finger protein 170	-	-	-	gi|224030449|gb|ACN34300.1|/0/unknown [Zea mays]
GRMZM2G146786	1190.04	78	224	11.19	22.92	1.0344	Up	1.21404e-08	3.24753e-07	IDP2421	-	GO:0043231//intracellular membrane-bounded organelle;GO:0043231//intracellular membrane-bounded organelle	-	-	gi|413923204|gb|AFW63136.1|/7.52204e-97/hypothetical protein ZEAMMB73_570535 [Zea mays]
GRMZM2G069827	1030.07	41	116	6.74	13.78	1.03176	Up	5.98348e-05	0.000697918	-	K12198|1|5e-113|299|sbi:SORBI_03g009000|charged multivesicular body protein 5	-	-	GO:0006810//transport;GO:0006810//transport;GO:0006810//transport	gi|194703018|gb|ACF85593.1|/2.81545e-115/unknown [Zea mays]
GRMZM2G112629	1288	38	109	5.04	10.28	1.02834	Up	7.80042e-05	0.000874125	-	-	-	-	-	gi|226531322|ref|NP_001140429.1|/2.15884e-87/putative HLH DNA-binding domain superfamily protein [Zea mays]
GRMZM2G004422	1561.63	91.52	266	10.1	20.59	1.02759	Up	2.33218e-10	8.0881e-09	-	K13148|1|2e-08|59.3|vvi:100261060|integrator complex subunit 11 [EC:3.1.27.-];K11982|3|3e-07|55.8|bdi:100833984|E3 ubiquitin-protein ligase RNF115/126 [EC:6.3.2.19];K05283|4|5e-07|55.1|aly:ARALYDRAFT_354960|phosphatidylinositol glycan, class W [EC:2.3.-.-];K15692|5|2e-06|53.1|bdi:100845565|E3 ubiquitin-protein ligase RNF13 [EC:6.3.2.19]	-	GO:0046914//transition metal ion binding;GO:0046914//transition metal ion binding	-	gi|226495131|ref|NP_001142014.1|/2.56219e-89/uncharacterized protein LOC100274167 [Zea mays]
GRMZM2G116133	1341.5	171.88	452.31	20.09	40.92	1.02633	Up	2.30934e-13	1.18549e-11	-	K12589|1|7e-133|471|zma:100856959|exosome complex component RRP42	GO:0044424//intracellular part;GO:0044424//intracellular part	GO:0003676//nucleic acid binding;GO:0008408//3'-5' exonuclease activity;GO:0005515//protein binding;GO:0008428//ribonuclease inhibitor activity;GO:0003676//nucleic acid binding;GO:0008408//3'-5' exonuclease activity;GO:0005515//protein binding;GO:0008428//ribonuclease inhibitor activity;GO:0003676//nucleic acid binding;GO:0008408//3'-5' exonuclease activity;GO:0003676//nucleic acid binding;GO:000…	GO:0010467//gene expression;GO:0019219;GO:0060699//regulation of endoribonuclease activity;GO:0010467//gene expression;GO:0019219;GO:0060699//regulation of endoribonuclease activity;GO:0010467//gene expression;GO:0010467//gene expression;GO:0010467//gene expression	gi|195620544|gb|ACG32102.1|/1.45674e-132/exosome complex exonuclease RRP42 [Zea mays]
GRMZM2G055107	1247.07	252	630	30.17	61.43	1.02583	Up	1.12476e-15	7.36305e-14	-	-	GO:0009536//plastid;GO:0009536//plastid	-	-	gi|413956919|gb|AFW89568.1|/1.54185e-56/hypothetical protein ZEAMMB73_759557 [Zea mays]
GRMZM2G089308	934	57	162.99	10.53	21.44	1.0258	Up	1.75466e-06	3.02424e-05	-	K00391|1|3e-34|143|olu:OSTLU_9083|[EC:1.8.4.-];K07305|2|7e-30|129|vcn:VOLCADRAFT_76054|peptide-methionine (R)-S-oxide reductase [EC:1.8.4.12]	-	GO:0016671//oxidoreductase activity, acting on a sulfur group of donors, disulfide as acceptor	GO:0008152//metabolic process	gi|194703344|gb|ACF85756.1|/2.85228e-85/unknown [Zea mays]
GRMZM2G031420	574	61	174	18.81	38.19	1.0217	Up	6.46964e-07	1.22451e-05	-	-	GO:0031410//cytoplasmic vesicle	-	-	gi|195610048|gb|ACG26854.1|/2.04159e-34/hypothetical protein [Zea mays]
GRMZM2G059225	3199	66	188	3.46	7.02	1.0207	Up	2.37986e-07	4.97626e-06	-	K12489|1|0.0|1207|sbi:SORBI_07g025880|Arf-GAP with coiled-coil, ANK repeat and PH domain-containing protein	GO:0016020//membrane;GO:0005798//Golgi-associated vesicle;GO:0044424//intracellular part	GO:0046914//transition metal ion binding;GO:0016301//kinase activity;GO:0005083//small GTPase regulator activity;GO:0005543//phospholipid binding;GO:0032559;GO:0005083//small GTPase regulator activity;GO:0046914//transition metal ion binding	GO:0003002//regionalization;GO:0032012//regulation of ARF protein signal transduction;GO:0009887//organ morphogenesis;GO:0006464//cellular protein modification process;GO:0009725//response to hormone stimulus;GO:0044238//primary metabolic process;GO:0032012//regulation of ARF protein signal transduction;GO:0044237//cellular metabolic process	gi|414886111|tpg|DAA62125.1|/3.79163e-101/TPA: putative ARF GTPase activating domain protein with ankyrin repeat-containing protein [Zea mays]
GRMZM2G023711	1194.33	41	117	5.89	11.93	1.01825	Up	4.67472e-05	0.000565843	-	-	-	GO:0015036//disulfide oxidoreductase activity	GO:0018904;GO:0019725//cellular homeostasis	gi|413939146|gb|AFW73697.1|/6.80173e-37/hypothetical protein ZEAMMB73_081186 [Zea mays]
GRMZM2G027241	1458.89	93	257	10.54	21.33	1.01701	Up	5.32466e-09	1.50026e-07	-	-	GO:0031410//cytoplasmic vesicle;GO:0031410//cytoplasmic vesicle;GO:0031410//cytoplasmic vesicle	-	-	gi|413918275|gb|AFW58207.1|/1.10517e-19/hypothetical protein ZEAMMB73_397599 [Zea mays]
GRMZM2G097959	2258	69	196	5.15	10.42	1.01671	Up	1.44097e-07	3.15642e-06	-	-	GO:0043231//intracellular membrane-bounded organelle	-	-	gi|238006828|gb|ACR34449.1|/0/unknown [Zea mays]
GRMZM2G702517	607	56	159	16.27	32.88	1.015	Up	2.2525e-06	3.78181e-05	-	K09285|1|8e-10|61.6|sbi:SORBI_05g001790|AP2-like factor, ANT lineage	-	-	-	gi|413922507|gb|AFW62439.1|/7.55126e-54/hypothetical protein ZEAMMB73_661270 [Zea mays]
GRMZM5G896756	644.55	57	148.04	14.23	28.73	1.01362	Up	4.59406e-05	0.000557736	-	-	-	GO:0046914//transition metal ion binding;GO:0046914//transition metal ion binding	-	gi|226495869|ref|NP_001141476.1|/1.13471e-62/uncharacterized protein LOC100273587 [Zea mays]
GRMZM2G072300	1055.23	106	279	16.02	32.33	1.013	Up	1.07751e-08	2.91787e-07	-	K09510|1|1e-14|78.6|bdi:100832977|DnaJ homolog subfamily B member 4	-	GO:0005515//protein binding;GO:0005515//protein binding	GO:0044267//cellular protein metabolic process;GO:0044267//cellular protein metabolic process	gi|413938985|gb|AFW73536.1|/2.63985e-65/chaperone protein dnaJ isoform 1 [Zea mays]
GRMZM2G027043	1767	41.9	118.92	4.02	8.11	1.01251	Up	3.6449e-05	0.000455684	-	K00981|1|9e-88|322|smo:SELMODRAFT_270747|phosphatidate cytidylyltransferase [EC:2.7.7.41]	GO:0009526//plastid envelope;GO:0031224//intrinsic to membrane	GO:0070567	GO:0006644//phospholipid metabolic process	gi|226496521|ref|NP_001149794.1|/1.39822e-138/phosphatidate cytidylyltransferase [Zea mays]
GRMZM2G070167	966.74	42	121	7.62	15.35	1.01038	Up	2.83004e-05	0.000365002	-	-	-	-	-	gi|414876752|tpg|DAA53883.1|/3.18918e-50/TPA: light-induced protein 1-like protein [Zea mays]
GRMZM2G035853	485	246.69	697.83	91.17	183.54	1.00946	Up	3.19344e-23	3.81369e-21	-	-	-	-	-	gi|413953065|gb|AFW85714.1|/3.30279e-46/hypothetical protein ZEAMMB73_682406 [Zea mays]
GRMZM2G025123	1262.77	39.41	116.89	5.59	11.25	1.009	Up	2.19168e-05	0.000290818	-	K03118|1|3e-67|253|zma:100279882|sec-independent protein translocase protein TatC	GO:0043234//protein complex;GO:0016021//integral to membrane;GO:0009534//chloroplast thylakoid;GO:0043234//protein complex;GO:0016021//integral to membrane;GO:0009534//chloroplast thylakoid;GO:0043234//protein complex;GO:0016021//integral to membrane;GO:0009534//chloroplast thylakoid	GO:0008320//protein transmembrane transporter activity;GO:0015291//secondary active transmembrane transporter activity;GO:0022804;GO:0008320//protein transmembrane transporter activity;GO:0008320//protein transmembrane transporter activity;GO:0015291//secondary active transmembrane transporter activity	GO:0009687//abscisic acid metabolic process;GO:0009566//fertilization;GO:0015031//protein transport;GO:0009687//abscisic acid metabolic process;GO:0009566//fertilization;GO:0015031//protein transport;GO:0009687//abscisic acid metabolic process;GO:0009566//fertilization;GO:0015031//protein transport	gi|238006032|gb|ACR34051.1|/1.89152e-145/unknown [Zea mays]
GRMZM2G107089	1939.84	128	360	11.11	22.33	1.00712	Up	1.6296e-12	7.41821e-11	-	K01881|1|0.0|875|zma:100283555|prolyl-tRNA synthetase [EC:6.1.1.15]	GO:0009532//plastid stroma;GO:0009532//plastid stroma	GO:0004812//aminoacyl-tRNA ligase activity;GO:0032559;GO:0004812//aminoacyl-tRNA ligase activity;GO:0032559	GO:0048229//gametophyte development;GO:0009791//post-embryonic development;GO:0006418//tRNA aminoacylation for protein translation;GO:0015979//photosynthesis;GO:0003006//developmental process involved in reproduction;GO:0048229//gametophyte development;GO:0009791//post-embryonic development;GO:0006418//tRNA aminoacylation for protein translation;GO:0015979//photosynthesis;GO:0003006//developmenta…	gi|414883645|tpg|DAA59659.1|/0/TPA: prolyl-tRNA synthetase [Zea mays]
GRMZM2G103166	1544.2	137	377	14.69	29.52	1.00686	Up	1.89655e-12	8.55156e-11	-	K11684|1|4e-15|81.6|sbi:SORBI_03g001920|bromodomain-containing factor 1	-	GO:0016740//transferase activity;GO:0016740//transferase activity	-	gi|413942791|gb|AFW75440.1|/2.80898e-117/transcription factor GTE6 [Zea mays]
GRMZM2G071378	1630	74.78	210.76	7.78	15.61	1.00463	Up	5.31778e-08	1.26168e-06	-	K15285|1|5e-37|122|smo:SELMODRAFT_268189|solute carrier family 35, member E3	GO:0031224//intrinsic to membrane;GO:0031224//intrinsic to membrane;GO:0031224//intrinsic to membrane;GO:0031224//intrinsic to membrane	-	-	gi|413924771|gb|AFW64703.1|/2.29778e-140/integral membrane protein like protein isoform 1 [Zea mays]
GRMZM2G041714	1117.61	100	282	15.35	30.79	1.00422	Up	3.70716e-10	1.24629e-08	-	-	-	-	-	gi|226499390|ref|NP_001141245.1|/5.068e-42/uncharacterized protein LOC100273332 [Zea mays]
GRMZM2G478430	844	53	149	10.88	21.78	1.00133	Up	6.08068e-06	9.281e-05	-	-	-	-	-	gi|413918262|gb|AFW58194.1|/2.79605e-25/hypothetical protein ZEAMMB73_064829 [Zea mays]
GRMZM2G007080	1229	85	239	11.82	23.66	1.00122	Up	9.1977e-09	2.51457e-07	-	-	GO:0005743//mitochondrial inner membrane;GO:0031224//intrinsic to membrane	GO:0008320//protein transmembrane transporter activity	GO:0006810//transport;GO:0003006//developmental process involved in reproduction	gi|238013376|gb|ACR37723.1|/5.18183e-91/unknown [Zea mays]
GRMZM2G139018	1032.76	35.11	110	6.51	13.03	1.00111	Up	1.23436e-05	0.000175105	-	-	GO:0031410//cytoplasmic vesicle;GO:0031410//cytoplasmic vesicle	-	-	gi|414878520|tpg|DAA55651.1|/1.26887e-85/TPA: hypothetical protein ZEAMMB73_552404 [Zea mays]
GRMZM2G405818	806	162.27	456.16	34.97	69.96	1.00041	Up	1.69891e-15	1.09459e-13	-	K02987|1|3e-32|137|osa:4326022|small subunit ribosomal protein S4e	-	-	-	gi|413923241|gb|AFW63173.1|/1.8378e-47/putative ribosomal protein S4 (RPS4A) family protein [Zea mays]
GRMZM2G165216	447	17.14	0	6.92	0.01	-9.43463	Down	2.7874e-07	5.73597e-06	-	-	GO:0044464//cell part	GO:0004721//phosphoprotein phosphatase activity;GO:0004672//protein kinase activity;GO:0032559	GO:0006464//cellular protein modification process	gi|414591620|tpg|DAA42191.1|/5.24903e-47/TPA: hypothetical protein ZEAMMB73_676758 [Zea mays]
GRMZM5G817310	1209.43	40.51	0	5.73	0.01	-9.16239	Down	4.84138e-16	3.25136e-14	-	-	GO:0044464//cell part;GO:0044464//cell part;GO:0044464//cell part;GO:0044464//cell part;GO:0044464//cell part	-	-	gi|413950497|gb|AFW83146.1|/1.09971e-47/hypothetical protein ZEAMMB73_175969, partial [Zea mays]
GRMZM5G860824	1095	36.08	0	5.65	0.01	-9.14211	Down	1.61617e-14	9.45262e-13	-	K00826|1|0.0|728|zma:100192912|branched-chain amino acid aminotransferase [EC:2.6.1.42]	-	-	-	gi|413957227|gb|AFW89876.1|/0/branched-chain-amino-acid aminotransferase [Zea mays]
GRMZM2G476902	958	27.98	0	5.04	0.01	-8.97728	Down	4.32916e-11	1.66752e-09	-	-	-	-	-	gi|413924762|gb|AFW64694.1|/7.70156e-110/putative ARM repeat-containing protein containing family protein [Zea mays]
GRMZM2G701047	936	25.29	0	4.66	0.01	-8.86419	Down	2.50128e-10	8.65352e-09	-	-	-	-	-	gi|413943890|gb|AFW76539.1|/3.37712e-78/hypothetical protein ZEAMMB73_352289 [Zea mays]
AC149810.2_FG003	3540	85.53	0	4.05	0.01	-8.66178	Down	3.51068e-33	6.07284e-31	-	-	GO:0044464//cell part	GO:0046914//transition metal ion binding;GO:0016790//thiolester hydrolase activity	GO:0019941//modification-dependent protein catabolic process	gi|413956938|gb|AFW89587.1|/0/hypothetical protein ZEAMMB73_931714 [Zea mays]
GRMZM5G885274	1696	35.1	0	3.51	0.01	-8.45533	Down	3.88478e-14	2.20875e-12	-	K14494|1|2e-56|218|vvi:100232937|DELLA protein	-	-	-	gi|413938737|gb|AFW73288.1|/0/hypothetical protein ZEAMMB73_933094 [Zea mays]
AC195596.3_FG002	1320	26.23	0	3.39	0.01	-8.40514	Down	1.0406e-10	3.80779e-09	-	-	-	-	-	gi|414587933|tpg|DAA38504.1|/4.81789e-90/TPA: hypothetical protein ZEAMMB73_796160 [Zea mays]
AC199182.3_FG003	1320	26.23	0	3.39	0.01	-8.40514	Down	1.0406e-10	3.80291e-09	-	-	-	-	-	gi|414587933|tpg|DAA38504.1|/4.81789e-90/TPA: hypothetical protein ZEAMMB73_796160 [Zea mays]
GRMZM2G433616	1685	24.45	0	2.46	0.01	-7.94251	Down	6.01232e-10	1.94562e-08	-	-	-	-	-	gi|413948552|gb|AFW81201.1|/0/hypothetical protein ZEAMMB73_355661 [Zea mays]
GRMZM2G088121	919	12.08	0	2.27	0.01	-7.82655	Down	2.23664e-05	0.000295821	-	-	-	-	-	gi|226493948|ref|NP_001145528.1|/4.44228e-75/uncharacterized protein LOC100278952 [Zea mays]
GRMZM2G037751	2132	26.73	0	2.12	0.01	-7.72792	Down	1.0406e-10	3.79805e-09	-	-	-	-	-	gi|259490144|ref|NP_001158995.1|/2.74382e-83/uncharacterized protein LOC100303985 [Zea mays]
GRMZM2G124919	1089	12.99	0	2.05	0.01	-7.67948	Down	2.23664e-05	0.000296233	-	K00122|1|5e-154|541|sbi:SORBI_10g016920|formate dehydrogenase [EC:1.2.1.2]	GO:0043231//intracellular membrane-bounded organelle	GO:0016614//oxidoreductase activity, acting on CH-OH group of donors;GO:0016620//oxidoreductase activity, acting on the aldehyde or oxo group of donors, NAD or NADP as acceptor;GO:0000166//nucleotide binding	GO:0008152//metabolic process	gi|414590894|tpg|DAA41465.1|/0/TPA: hypothetical protein ZEAMMB73_776135 [Zea mays]
GRMZM2G096553	2313	25.74	0	1.88	0.01	-7.55459	Down	2.50128e-10	8.64304e-09	-	K06176|1|0.0|711|zma:100280058|tRNA pseudouridine13 synthase [EC:5.4.99.27]	-	GO:0003676//nucleic acid binding;GO:0016866//intramolecular transferase activity;GO:0003676//nucleic acid binding;GO:0016866//intramolecular transferase activity;GO:0003676//nucleic acid binding;GO:0016866//intramolecular transferase activity	GO:0001522//pseudouridine synthesis;GO:0001522//pseudouridine synthesis;GO:0001522//pseudouridine synthesis	gi|413949788|gb|AFW82437.1|/0/hypothetical protein ZEAMMB73_597944 [Zea mays]
GRMZM5G851925	1344	12.96	0	1.64	0.01	-7.35755	Down	2.23664e-05	0.000296095	-	K02261|1|1e-70|265|osa:6450161|cytochrome c oxidase subunit 2	GO:0031224//intrinsic to membrane;GO:0005746//mitochondrial respiratory chain;GO:0031410//cytoplasmic vesicle	GO:0015002//heme-copper terminal oxidase activity;GO:0005506//iron ion binding	GO:0022904//respiratory electron transport chain;GO:0051234//establishment of localization	gi|414587696|tpg|DAA38267.1|/5.13776e-71/TPA: putative cytochrome C oxidase subunit II family protein [Zea mays]
AC233871.1_FG004	3042	21	0	1.16	0.01	-6.85798	Down	8.34988e-09	2.30486e-07	-	-	-	GO:0003676//nucleic acid binding	-	gi|413941590|gb|AFW74239.1|/0/putative homeodomain-like transcription factor superfamily protein [Zea mays]
GRMZM2G464572	3355	20.24	0	1.01	0.01	-6.65821	Down	2.00706e-08	5.17952e-07	-	K10581|1|0.0|728|gmx:100805463|ubiquitin-conjugating enzyme E2 O [EC:6.3.2.19]	-	GO:0016879//ligase activity, forming carbon-nitrogen bonds	GO:0015698//inorganic anion transport;GO:0006464//cellular protein modification process;GO:0072506;GO:0009267//cellular response to starvation	gi|413954007|gb|AFW86656.1|/0/hypothetical protein ZEAMMB73_469096 [Zea mays]
GRMZM2G329740	2595	13.85	0	0.9	0.01	-6.49185	Down	9.305e-06	0.000136057	-	K11657|1|3e-97|355|zma:542440|remodeling and spacing factor 1;K06630|5|7e-88|323|zma:100273134|tyrosine 3-monooxygenase/tryptophan 5-monooxygenase activation protein	-	GO:0005515//protein binding;GO:0005515//protein binding	-	gi|414871907|tpg|DAA50464.1|/0/TPA: hypothetical protein ZEAMMB73_809614 [Zea mays]
GRMZM2G384463	2097	11.16	0	0.9	0.01	-6.49185	Down	5.3762e-05	0.000636448	-	K02868|1|2e-51|202|zma:100192743|large subunit ribosomal protein L11e	GO:0030529//ribonucleoprotein complex	GO:0005198//structural molecule activity	GO:0010467//gene expression	gi|414877482|tpg|DAA54613.1|/0/TPA: hypothetical protein ZEAMMB73_901965 [Zea mays]
GRMZM2G012923	3184	12.54	0	0.66	0.01	-6.04439	Down	2.23664e-05	0.000295958	-	K08150|1|6e-36|151|mtr:MTR_7g005910|MFS transporter, SP family, solute carrier family 2 (myo-inositol transporter), member 13	GO:0016020//membrane	GO:0016491//oxidoreductase activity;GO:0005215//transporter activity	GO:0006810//transport	gi|413919343|gb|AFW59275.1|/0/hypothetical protein ZEAMMB73_154299 [Zea mays]
GRMZM2G087759	1467	15.82	0.89	1.83	0.07	-4.70834	Down	1.61049e-06	2.80284e-05	-	K09580|1|6e-16|84.0|smo:SELMODRAFT_52354|protein disulfide-isomerase A1 [EC:5.3.4.1]	GO:0031410//cytoplasmic vesicle	GO:0016301//kinase activity;GO:0032559	GO:0006464//cellular protein modification process;GO:0019725//cellular homeostasis	gi|414589090|tpg|DAA39661.1|/0/TPA: hypothetical protein ZEAMMB73_944452 [Zea mays]
GRMZM2G428518	2167	40	4	2.96	0.22	-3.75002	Down	8.9875e-12	3.76683e-10	-	K01187|1|0.0|1109|sbi:SORBI_10g027110|alpha-glucosidase [EC:3.2.1.20]	GO:0031410//cytoplasmic vesicle;GO:0031410//cytoplasmic vesicle;GO:0031410//cytoplasmic vesicle	GO:0004558//alpha-glucosidase activity;GO:0005488//binding;GO:0004558//alpha-glucosidase activity;GO:0005488//binding;GO:0004558//alpha-glucosidase activity;GO:0005488//binding	GO:0044238//primary metabolic process;GO:0044238//primary metabolic process;GO:0044238//primary metabolic process	gi|413943375|gb|AFW76024.1|/0/hypothetical protein ZEAMMB73_615454 [Zea mays]
GRMZM2G078954	2312	20.65	2.82	1.51	0.15	-3.33151	Down	1.8473e-06	3.16671e-05	-	-	-	GO:0003676//nucleic acid binding	-	gi|413944272|gb|AFW76921.1|/0/putative NAC domain transcription factor superfamily protein [Zea mays]
GRMZM2G452170	780	29.12	4.81	6.49	0.76	-3.09415	Down	4.4386e-08	1.0637e-06	-	-	GO:0044464//cell part	-	-	gi|195643118|gb|ACG41027.1|/1.89715e-126/hypothetical protein [Zea mays]
GRMZM2G154870	1755	121.62	21.52	11.74	1.48	-2.98776	Down	7.36094e-27	1.05576e-24	-	K00517|1|6e-157|552|osa:4334183|[EC:1.14.-.-]	-	GO:0016491//oxidoreductase activity;GO:0005506//iron ion binding	-	gi|414872950|tpg|DAA51507.1|/0/TPA: putative cytochrome P450 superfamily protein [Zea mays]
GRMZM2G048450	1898	26.2	4.76	2.33	0.3	-2.9573	Down	4.22538e-07	8.35764e-06	-	K13425|1|2e-44|179|vvi:100256849|WRKY transcription factor 22	-	GO:0003677//DNA binding;GO:0001071//nucleic acid binding transcription factor activity	GO:0010467//gene expression	gi|323388653|gb|ADX60131.1|/1.16351e-146/WRKY transcription factor [Zea mays]
GRMZM2G178182	1227	17	3	2.23	0.3	-2.89401	Down	8.2746e-05	0.000921473	-	-	GO:0043231//intracellular membrane-bounded organelle;GO:0043231//intracellular membrane-bounded organelle	-	-	gi|212721128|ref|NP_001132785.1|/3.79862e-126/uncharacterized protein LOC100194274 [Zea mays]
GRMZM2G073114	847	61	12	12.48	1.75	-2.83419	Down	1.93583e-13	1.01381e-11	-	-	-	-	-	gi|413933944|gb|AFW68495.1|/1.79752e-96/hypothetical protein ZEAMMB73_752670 [Zea mays]
GRMZM2G070818	1345	37.83	7.55	4.8	0.68	-2.81943	Down	8.07598e-09	2.23574e-07	-	-	-	-	-	gi|414884602|tpg|DAA60616.1|/5.43854e-105/TPA: hypothetical protein ZEAMMB73_920284 [Zea mays]
GRMZM2G053338	2302.99	143.87	35.38	10.18	1.84	-2.46796	Down	4.4525e-26	6.19918e-24	-	K14487|1|0.0|1152|zma:100285387|auxin responsive GH3 gene family	-	-	GO:0009314//response to radiation;GO:0009725//response to hormone stimulus;GO:0009314//response to radiation;GO:0009725//response to hormone stimulus	gi|414887410|tpg|DAA63424.1|/0/TPA: indole-3-acetic acid-amido synthetase GH3.8 [Zea mays]
GRMZM2G118628	3047	23.89	6	1.32	0.24	-2.45943	Down	4.07404e-05	0.000502078	-	K00924|1|8e-75|280|aly:ARALYDRAFT_486409|[EC:2.7.1.-];K04733|4|4e-50|198|ath:AT5G38990|interleukin-1 receptor-associated kinase 4 [EC:2.7.11.1]	GO:0043231//intracellular membrane-bounded organelle;GO:0044444//cytoplasmic part	GO:0004672//protein kinase activity;GO:0032559	GO:0006464//cellular protein modification process	gi|413920776|gb|AFW60708.1|/0/putative CRINKLY4-like receptor protein kinase family protein [Zea mays]
GRMZM2G126936	1214	36.57	10.18	5.15	1.02	-2.336	Down	4.7219e-07	9.22467e-06	-	-	-	-	-	gi|414878856|tpg|DAA55987.1|/7.33285e-98/TPA: putative NAC domain transcription factor superfamily protein [Zea mays]
GRMZM2G325118	1931	26089	7666	2284.47	477.74	-2.25756	Down	0	0	-	-	-	-	-	gi|226510357|ref|NP_001142639.1|/0/uncharacterized protein LOC100274918 precursor [Zea mays]
GRMZM2G038116	2152	80.11	25.29	6.28	1.41	-2.15507	Down	6.6032e-13	3.19981e-11	-	-	-	-	-	gi|219363387|ref|NP_001136961.1|/2.5948e-81/hypothetical protein [Zea mays]
GRMZM2G327234	2137	31.44	10.12	2.48	0.57	-2.12131	Down	1.11275e-05	0.000159599	-	K03549|1|1e-120|432|smo:SELMODRAFT_149244|KUP system potassium uptake protein	GO:0044464//cell part	GO:0046873//metal ion transmembrane transporter activity	GO:0030001//metal ion transport;GO:0034220//ion transmembrane transport	gi|413919502|gb|AFW59434.1|/0/hypothetical protein ZEAMMB73_310046 [Zea mays]
GRMZM2G313761	3156	55	20	2.93	0.76	-1.94683	Down	2.87744e-08	7.2042e-07	-	K11267|1|5e-35|148|sbi:SORBI_10g010540|sister chromatid cohesion protein PDS5	GO:0044464//cell part	-	-	gi|413944354|gb|AFW77003.1|/0/hypothetical protein ZEAMMB73_612907 [Zea mays]
GRMZM2G181291	1216	30.1	10.96	4.23	1.1	-1.94315	Down	2.05408e-05	0.000274602	-	-	-	-	-	gi|413941847|gb|AFW74496.1|/1.23005e-52/hypothetical protein ZEAMMB73_812131 [Zea mays]
GRMZM2G051943	1246	17907.5	6631.5	2455.76	647.23	-1.92382	Down	0	0	-	K01183|1|1e-118|424|sbi:SORBI_06g021220|chitinase [EC:3.2.1.14]	-	GO:0004553//hydrolase activity, hydrolyzing O-glycosyl compounds;GO:0030247//polysaccharide binding	GO:0006950//response to stress;GO:0006026	gi|259490577|ref|NP_001158904.1|/1.9786e-146/endochitinase A precursor [Zea mays]
GRMZM2G393215	1400	115.63	42.96	14.07	3.72	-1.91925	Down	1.05653e-15	6.96429e-14	-	-	-	-	-	gi|414869862|tpg|DAA48419.1|/0/TPA: hypothetical protein ZEAMMB73_540771 [Zea mays]
GRMZM2G333916	5028	58.45	22.09	1.94	0.52	-1.89947	Down	2.4468e-08	6.17476e-07	-	K00558|1|0.0|1920|zma:542082|DNA (cytosine-5-)-methyltransferase [EC:2.1.1.37]	GO:0043231//intracellular membrane-bounded organelle;GO:0043231//intracellular membrane-bounded organelle	GO:0008757//S-adenosylmethionine-dependent methyltransferase activity;GO:0003676//nucleic acid binding;GO:0008757//S-adenosylmethionine-dependent methyltransferase activity;GO:0003676//nucleic acid binding	GO:0032776//DNA methylation on cytosine;GO:0032776//DNA methylation on cytosine	gi|414883785|tpg|DAA59799.1|/0/TPA: cytosine-specific methyltransferase [Zea mays]
GRMZM2G141785	898	47.13	18	9.07	2.47	-1.87659	Down	5.99156e-07	1.1416e-05	-	-	-	-	-	gi|414877246|tpg|DAA54377.1|/1.29808e-39/TPA: hypothetical protein ZEAMMB73_424661 [Zea mays]
AC233887.1_FG005	1395	443	173	54.09	15.03	-1.84752	Down	2.85738e-52	8.40777e-50	-	-	GO:0044464//cell part	-	-	gi|414587303|tpg|DAA37874.1|/0/TPA: hypothetical protein ZEAMMB73_603670 [Zea mays]
GRMZM2G018336	1354	38.32	14.97	4.82	1.34	-1.8468	Down	4.76008e-06	7.40393e-05	-	K09287|1|9e-106|382|zma:100284738|RAV-like factor	GO:0043231//intracellular membrane-bounded organelle	GO:0003676//nucleic acid binding;GO:0001071//nucleic acid binding transcription factor activity	GO:0006351//transcription, DNA-dependent	gi|413934037|gb|AFW68588.1|/1.65419e-109/hypothetical protein ZEAMMB73_576107 [Zea mays]
GRMZM5G801949	1894	188	75	16.79	4.77	-1.81554	Down	1.24305e-22	1.41351e-20	-	K08150|1|5e-42|171|vvi:100268023|MFS transporter, SP family, solute carrier family 2 (myo-inositol transporter), member 13	GO:0043231//intracellular membrane-bounded organelle;GO:0031224//intrinsic to membrane;GO:0031224//intrinsic to membrane	GO:0005402//cation:sugar symporter activity;GO:0005402//cation:sugar symporter activity	GO:0009725//response to hormone stimulus;GO:0016049//cell growth;GO:0071702;GO:0071702	gi|414887105|tpg|DAA63119.1|/0/TPA: sugar carrier protein [Zea mays]
GRMZM2G096680	700	29.55	11.83	7.39	2.1	-1.81519	Down	8.43062e-05	0.000935927	-	-	-	GO:0016787//hydrolase activity;GO:0004866//endopeptidase inhibitor activity;GO:0016787//hydrolase activity;GO:0004866//endopeptidase inhibitor activity;GO:0016787//hydrolase activity;GO:0004866//endopeptidase inhibitor activity	GO:0006950//response to stress;GO:0006950//response to stress;GO:0006950//response to stress	gi|226503924|ref|NP_001151896.1|/7.30068e-29/subtilisin-chymotrypsin inhibitor CI-1B [Zea mays]
GRMZM2G082034	1900	684.93	278.36	60.97	17.64	-1.78925	Down	2.48812e-76	1.076e-73	-	K01177|1|6e-74|276|zma:100281767|beta-amylase [EC:3.2.1.2]	GO:0043231//intracellular membrane-bounded organelle	GO:0043167//ion binding;GO:0016160//amylase activity	GO:0005976//polysaccharide metabolic process	gi|414866822|tpg|DAA45379.1|/0/TPA: beta-amylase [Zea mays]
GRMZM2G067946	705	59	25	14.63	4.41	-1.73008	Down	1.23943e-07	2.74871e-06	-	-	-	-	-	gi|414883441|tpg|DAA59455.1|/6.3329e-43/TPA: hypothetical protein ZEAMMB73_887085 [Zea mays]
GRMZM2G023346	2570	54	23	3.54	1.07	-1.72614	Down	4.61046e-07	9.03169e-06	-	-	-	GO:0060089	GO:0023052//signaling;GO:0009314//response to radiation	gi|226500830|ref|NP_001146359.1|/0/putative phototropic-resoponsive NPH3 family protein [Zea mays]
GRMZM2G070172	1648	2127	911	218.95	66.74	-1.71398	Down	2.01326e-219	2.49837e-216	-	K01176|1|0.0|676|zma:542522|alpha-amylase [EC:3.2.1.1]	GO:0031410//cytoplasmic vesicle	GO:0016160//amylase activity;GO:0046872//metal ion binding	GO:0005985//sucrose metabolic process;GO:0005982//starch metabolic process	gi|293334595|ref|NP_001169611.1|/0/uncharacterized protein LOC100383492 precursor [Zea mays]
AC152495.1_FG003	4860	107.97	46.65	3.71	1.14	-1.70239	Down	1.58619e-12	7.24369e-11	-	K03013|1|4e-94|345|vvi:100258335|DNA-directed RNA polymerases I, II, and III subunit RPABC1;K13457|2|3e-48|193|sbi:SORBI_10g028720|disease resistance protein RPM1;K00696|5|2e-44|180|zma:542711|sucrose-phosphate synthase [EC:2.4.1.14]	-	GO:0032559	GO:0012501//programmed cell death;GO:0006950//response to stress	gi|413915994|gb|AFW55926.1|/0/hypothetical protein ZEAMMB73_963178 [Zea mays]
GRMZM2G378106	2442.18	1083.03	470.21	74.56	23.08	-1.69176	Down	6.20454e-111	4.02477e-108	-	K14487|1|0.0|901|zma:100280445|auxin responsive GH3 gene family	-	-	-	gi|414590728|tpg|DAA41299.1|/0/TPA: indole-3-acetic acid amido synthetase [Zea mays]
GRMZM2G443785	2113	47.09	20.5	3.76	1.17	-1.68422	Down	2.5452e-06	4.21131e-05	-	K13648|1|7e-18|90.9|gmx:100805886|alpha-1,4-galacturonosyltransferase [EC:2.4.1.43]	GO:0031410//cytoplasmic vesicle	GO:0016740//transferase activity	-	gi|212275812|ref|NP_001130691.1|/5.14485e-175/uncharacterized protein LOC100191794 precursor [Zea mays]
GRMZM5G851485	1313	38.32	17.06	4.98	1.58	-1.65622	Down	4.14258e-05	0.000509425	-	-	GO:0009536//plastid	GO:0001071//nucleic acid binding transcription factor activity	GO:0006351//transcription, DNA-dependent	gi|226501084|ref|NP_001142628.1|/4.12825e-25/uncharacterized protein LOC100274900 [Zea mays]
GRMZM2G168651	1607	3462	1572	365.67	118.17	-1.62968	Down	0	0	-	-	-	-	-	gi|414587294|tpg|DAA37865.1|/1.17872e-12/TPA: hydroxyproline rich glycoprotein1 [Zea mays]
GRMZM2G145461	1227	48	22	6.69	2.18	-1.61768	Down	5.64208e-06	8.67652e-05	-	K01183|1|4e-124|318|osa:4338718|chitinase [EC:3.2.1.14]	-	GO:0004553//hydrolase activity, hydrolyzing O-glycosyl compounds;GO:0030247//polysaccharide binding	GO:0006026	gi|214015069|gb|ACJ62151.1|/4.05566e-172/chitinase [Zea mays subsp. parviglumis]
AC208221.3_FG002	744	39	18	9.14	3	-1.60723	Down	4.6854e-05	0.000566896	-	-	-	GO:0004866//endopeptidase inhibitor activity	GO:0051346//negative regulation of hydrolase activity	gi|414586748|tpg|DAA37319.1|/2.59441e-114/TPA: hypothetical protein ZEAMMB73_820466 [Zea mays]
GRMZM5G852533	1623	42.93	19.83	4.49	1.48	-1.60112	Down	1.86345e-05	0.000252188	-	-	-	GO:0000989//transcription factor binding transcription factor activity	GO:0006351//transcription, DNA-dependent	gi|414869982|tpg|DAA48539.1|/1.13223e-147/TPA: hypothetical protein ZEAMMB73_618405 [Zea mays]
GRMZM2G027393	610	62.22	29.02	17.99	5.97	-1.59139	Down	3.52222e-07	7.08465e-06	-	-	-	-	-	gi|414589428|tpg|DAA39999.1|/8.04214e-35/TPA: hypothetical protein ZEAMMB73_227588 [Zea mays]
AC231226.2_FG007	1281	44.06	20.75	5.87	1.97	-1.57516	Down	1.25072e-05	0.000176986	-	-	-	-	-	gi|413919310|gb|AFW59242.1|/0/hypothetical protein ZEAMMB73_780033 [Zea mays]
GRMZM2G092474	1133	3558	1700	538.19	183.01	-1.55619	Down	0	0	-	-	GO:0031410//cytoplasmic vesicle	-	-	gi|414880031|tpg|DAA57162.1|/9.56742e-121/TPA: putative thaumatin domain family protein [Zea mays]
GRMZM2G125032	1279	2171	1043	289.82	99.09	-1.54835	Down	3.9298e-193	4.15424e-190	-	-	GO:0031410//cytoplasmic vesicle	GO:0043167//ion binding;GO:0008422//beta-glucosidase activity	GO:0044238//primary metabolic process;GO:0006950//response to stress	gi|302635593|gb|ADL60383.1|/0/beta-1,3-glucanase precursor [Zea mays]
GRMZM2G028393	622.1	6059	2863	1667.69	576.87	-1.53153	Down	0	0	sci1	-	-	GO:0016787//hydrolase activity;GO:0004866//endopeptidase inhibitor activity;GO:0016787//hydrolase activity;GO:0004866//endopeptidase inhibitor activity	GO:0006950//response to stress;GO:0006950//response to stress	gi|214015183|gb|ACJ62208.1|/9.01749e-31/maize proteinase inhibitor [Zea mays subsp. parviglumis]
GRMZM2G162359	1736	783	384	76.43	26.68	-1.51838	Down	6.51098e-69	2.5457e-66	-	K01183|1|8e-49|193|gmx:100796155|chitinase [EC:3.2.1.14]	GO:0031410//cytoplasmic vesicle	GO:0016798//hydrolase activity, acting on glycosyl bonds;GO:0043167//ion binding	GO:0006950//response to stress;GO:0044238//primary metabolic process	gi|226491894|ref|NP_001142312.1|/7.43545e-169/hypothetical protein precursor [Zea mays]
GRMZM2G175406	1603	61	30	6.46	2.26	-1.51521	Down	1.06264e-06	1.9184e-05	-	-	-	-	-	gi|293335651|ref|NP_001168637.1|/1.08299e-126/uncharacterized protein LOC100382423 [Zea mays]
GRMZM2G160370	3378	48.3	24.15	2.4	0.85	-1.4975	Down	1.9066e-05	0.000257418	-	K14431|1|3e-17|89.7|aly:ARALYDRAFT_311885|transcription factor TGA;K09561|2|5e-09|62.4|vcn:VOLCADRAFT_67840|STIP1 homology and U-box containing protein 1 [EC:6.3.2.19];K08332|3|2e-08|60.5|vcn:VOLCADRAFT_41528|vacuolar protein 8	GO:0043234//protein complex;GO:0043231//intracellular membrane-bounded organelle	GO:0005488//binding;GO:0019787//small conjugating protein ligase activity	GO:0050832//defense response to fungus;GO:0032446//protein modification by small protein conjugation;GO:0012501//programmed cell death	gi|413936634|gb|AFW71185.1|/0/hypothetical protein ZEAMMB73_432257 [Zea mays]
GRMZM2G091201	908	160	80	30.45	10.83	-1.49141	Down	5.4112e-15	3.38698e-13	-	K12134|1|2e-06|51.2|aly:ARALYDRAFT_904154|circadian clock associated 1;K12133|2|4e-06|50.4|ath:AT1G01060|LATE ELONGATED HYPOCOTYL	GO:0043231//intracellular membrane-bounded organelle	GO:0003676//nucleic acid binding	-	gi|413945472|gb|AFW78121.1|/2.45562e-86/putative MYB DNA-binding domain superfamily protein [Zea mays]
GRMZM2G116520	783	346.64	173.77	77	27.47	-1.487	Down	1.33534e-30	2.10571e-28	-	-	-	GO:0004866//endopeptidase inhibitor activity	-	gi|413917854|gb|AFW57786.1|/3.01027e-55/hypothetical protein ZEAMMB73_561258 [Zea mays]
GRMZM2G381086	2807	66.74	33.63	4	1.43	-1.48398	Down	5.26924e-07	1.01549e-05	-	K13418|1|3e-50|198|vvi:100247683|somatic embryogenesis receptor kinase 1 [EC:2.7.10.1 2.7.11.1]	-	GO:0004672//protein kinase activity;GO:0000166//nucleotide binding	-	gi|226502146|ref|NP_001148116.1|/7.66388e-169/carbohydrate binding protein precursor [Zea mays]
GRMZM2G396248	2197	358	181.01	27.49	9.89	-1.47486	Down	4.05866e-31	6.58195e-29	-	K13407|1|1e-87|322|vvi:100259592|cytochrome P450, family 94, subfamily A, polypeptide 1 (fatty acid omega-hydroxylase) [EC:1.14.-.-];K00517|4|2e-79|295|ath:AT3G56630|[EC:1.14.-.-]	GO:0031410//cytoplasmic vesicle	GO:0016491//oxidoreductase activity;GO:0005506//iron ion binding	GO:0006091//generation of precursor metabolites and energy	gi|413951850|gb|AFW84499.1|/0/putative cytochrome P450 superfamily protein [Zea mays]
GRMZM2G021794	1228	96.78	48.96	13.47	4.85	-1.47369	Down	1.42562e-09	4.40846e-08	-	-	-	-	-	gi|226529634|ref|NP_001147565.1|/6.34124e-73/fasciclin-like arabinogalactan protein 7 precursor [Zea mays]
GRMZM2G028306	1701	234.04	118.36	23.32	8.4	-1.47311	Down	5.65978e-21	5.79002e-19	-	K15797|1|0.0|1058|zma:100037770|(S)-beta-macrocarpene synthase [EC:5.5.1.17];K14174|3|0.0|646|sbi:SORBI_07g004480|beta-farnesene synthase [EC:4.2.3.47];K14181|5|3e-106|384|vvi:100256880|valencene synthase [EC:4.2.3.73]	-	GO:0046872//metal ion binding;GO:0003824//catalytic activity	-	gi|413916943|gb|AFW56875.1|/0/hypothetical protein ZEAMMB73_944929 [Zea mays]
GRMZM2G011523	726.61	8346	4371	2060.24	747.45	-1.46276	Down	0	0	-	-	-	GO:0004866//endopeptidase inhibitor activity;GO:0004866//endopeptidase inhibitor activity;GO:0004866//endopeptidase inhibitor activity;GO:0004866//endopeptidase inhibitor activity;GO:0004866//endopeptidase inhibitor activity	-	gi|226507751|ref|NP_001148335.1|/3.4969e-39/Bowman-Birk type wound-induced proteinase inhibitor WIP1 precursor [Zea mays]
GRMZM5G836174	1395.42	78.11	55.04	13.16	4.78	-1.46108	Down	7.74354e-05	0.000868433	-	K13248|1|1e-74|278|gmx:100785878|pyridoxal phosphate phosphatase PHOSPHO2 [EC:3.1.3.74]	-	GO:0042578//phosphoric ester hydrolase activity;GO:0042578//phosphoric ester hydrolase activity	GO:0006796//phosphate-containing compound metabolic process;GO:0006796//phosphate-containing compound metabolic process	gi|212275706|ref|NP_001130133.1|/1.47012e-127/uncharacterized protein LOC100191227 [Zea mays]
GRMZM2G012806	731	88	45	21.01	7.65	-1.45754	Down	1.20671e-08	3.23095e-07	-	-	-	GO:0004866//endopeptidase inhibitor activity	GO:0006950//response to stress	gi|226507138|ref|NP_001152692.1|/5.951e-31/subtilisin-chymotrypsin inhibitor CI-1B [Zea mays]
GRMZM2G001799	1536	82.07	42.07	9.08	3.31	-1.45586	Down	3.93036e-08	9.54726e-07	-	K14484|1|2e-19|95.5|aly:ARALYDRAFT_319024|auxin-responsive protein IAA	GO:0043231//intracellular membrane-bounded organelle	GO:0005515//protein binding	GO:0009725//response to hormone stimulus;GO:0006412//translation	gi|413953020|gb|AFW85669.1|/5.69494e-93/hypothetical protein ZEAMMB73_459202 [Zea mays]
GRMZM2G153358	1361.4	47	24.01	5.87	2.14	-1.45575	Down	3.1062e-05	0.000396145	-	K15382|1|2e-88|324|sbi:SORBI_09g020860|solute carrier family 50 (sugar transporter)	GO:0031224//intrinsic to membrane;GO:0031410//cytoplasmic vesicle;GO:0031224//intrinsic to membrane;GO:0031410//cytoplasmic vesicle	-	GO:0071702;GO:0071702	gi|413945411|gb|AFW78060.1|/1.44017e-105/hypothetical protein ZEAMMB73_315036 [Zea mays]
GRMZM2G067315	1507	1644	858	185.45	68.88	-1.42887	Down	3.70628e-130	2.78381e-127	-	-	-	-	-	gi|414871248|tpg|DAA49805.1|/2.21653e-33/TPA: glycine-rich cell wall structural protein 2 [Zea mays]
GRMZM2G053206	1372	1111	581	137.99	51.36	-1.42585	Down	2.5739e-88	1.38612e-85	-	-	-	-	-	gi|414591869|tpg|DAA42440.1|/1.53976e-179/TPA: hypothetical protein ZEAMMB73_410724 [Zea mays]
GRMZM2G133781	1846	156	83	14.3	5.42	-1.39965	Down	1.81327e-13	9.53118e-12	-	K01183|1|2e-46|185|osa:4325067|chitinase [EC:3.2.1.14]	GO:0031410//cytoplasmic vesicle	GO:0016798//hydrolase activity, acting on glycosyl bonds;GO:0043167//ion binding	GO:0044238//primary metabolic process	gi|413920505|gb|AFW60437.1|/8.82617e-168/hypothetical protein ZEAMMB73_809662 [Zea mays]
GRMZM2G094404	1358	88.06	47.46	11.05	4.24	-1.38191	Down	3.5791e-08	8.77617e-07	-	-	-	GO:0005488//binding	-	gi|413955832|gb|AFW88481.1|/1.03212e-135/hypothetical protein ZEAMMB73_738687 [Zea mays]
GRMZM2G475884	1454	46	25	5.38	2.08	-1.37102	Down	8.6424e-05	0.000957575	-	K13692|1|1e-59|229|ath:AT1G05560|UDP-glucose:(indol-3-yl)acetate beta-D-glucosyltransferase [EC:2.4.1.121];K12338|3|3e-57|221|ath:AT4G14090|anthocyanin 5-O-glucosyltransferase [EC:2.4.1.-]	-	GO:0016757//transferase activity, transferring glycosyl groups	-	gi|413954492|gb|AFW87141.1|/0/hypothetical protein ZEAMMB73_427153 [Zea mays]
GRMZM2G006352	1223	148.39	80.96	20.74	8.05	-1.36536	Down	1.44077e-12	6.61134e-11	-	K09422|1|7e-100|362|sbi:SORBI_03g031430|myb proto-oncogene protein, plant	GO:0043231//intracellular membrane-bounded organelle	GO:0003676//nucleic acid binding	-	gi|413950945|gb|AFW83594.1|/1.33526e-139/putative MYB DNA-binding domain superfamily protein [Zea mays]
GRMZM2G059299	1483	124	68	14.22	5.55	-1.35736	Down	1.51199e-10	5.38094e-09	-	-	-	GO:0030246//carbohydrate binding;GO:0016740//transferase activity	-	gi|293335409|ref|NP_001168278.1|/0/putative D-mannose binding lectin domain related protein precursor [Zea mays]
GRMZM2G026980	1616.54	264	147	28.1	10.98	-1.35569	Down	2.74076e-20	2.60756e-18	xet1	K08235|1|4e-92|253|ath:AT4G25810|xyloglucan:xyloglucosyl transferase [EC:2.4.1.207]	GO:0005576//extracellular region;GO:0031410//cytoplasmic vesicle;GO:0030312//external encapsulating structure;GO:0005618//cell wall;GO:0005576//extracellular region;GO:0044424//intracellular part;GO:0016020//membrane	GO:0016798//hydrolase activity, acting on glycosyl bonds;GO:0016758//transferase activity, transferring hexosyl groups;GO:0016798//hydrolase activity, acting on glycosyl bonds;GO:0016758//transferase activity, transferring hexosyl groups	GO:0044042//glucan metabolic process;GO:0044042//glucan metabolic process;GO:0010476//gibberellin mediated signaling pathway;GO:0009827//plant-type cell wall modification;GO:0032502//developmental process	gi|413934723|gb|AFW69274.1|/0/Xyloglucan endo-transglycosylase Xyloglucan endotransglucosylase/hydrolase protein 23 [Zea mays]
GRMZM2G014392	2676	121.79	67.5	7.65	3.02	-1.34091	Down	3.48546e-10	1.1787e-08	-	K09840|1|0.0|1191|zma:732819|9-cis-epoxycarotenoid dioxygenase [EC:1.13.11.51]	GO:0009532//plastid stroma	GO:0043169//cation binding;GO:0010436//carotenoid dioxygenase activity	GO:0050896//response to stimulus;GO:0009687//abscisic acid metabolic process	gi|414871750|tpg|DAA50307.1|/0/TPA: viviparous14 [Zea mays]
GRMZM5G892675	4335	66.02	37.2	2.55	1.02	-1.32193	Down	4.54222e-06	7.11939e-05	-	K12843|1|3e-52|206|vvi:100248403|U4/U6 small nuclear ribonucleoprotein PRP3;K05681|3|6e-52|205|cme:CMS467C|ATP-binding cassette, subfamily G (WHITE), member 2	GO:0044464//cell part	GO:0017111//nucleoside-triphosphatase activity;GO:0032559	GO:0009207	gi|413950569|gb|AFW83218.1|/0/hypothetical protein ZEAMMB73_092889 [Zea mays]
GRMZM2G075315	1176	617.36	350.23	89.86	36.28	-1.3085	Down	7.53494e-44	1.76281e-41	-	-	-	GO:0004866//endopeptidase inhibitor activity;GO:0004866//endopeptidase inhibitor activity	-	gi|195623460|gb|ACG33560.1|/2.16034e-32/Bowman-Birk type trypsin inhibitor [Zea mays]
GRMZM2G022979	1202	126.68	71.83	18.03	7.28	-1.30839	Down	2.79394e-10	9.57319e-09	-	-	-	-	-	gi|414885431|tpg|DAA61445.1|/2.82221e-118/TPA: hypothetical protein ZEAMMB73_559862 [Zea mays]
GRMZM2G148646	540	90.09	51.17	29.66	11.99	-1.30669	Down	1.11965e-07	2.51234e-06	-	K02938|1|6e-65|244|zma:100191681|large subunit ribosomal protein L8e	GO:0030529//ribonucleoprotein complex	GO:0005198//structural molecule activity	GO:0010467//gene expression	gi|414878072|tpg|DAA55203.1|/3.59634e-64/TPA: hypothetical protein ZEAMMB73_300382 [Zea mays]
GRMZM5G871347	1346.73	124	73	15.83	6.58	-1.2665	Down	1.72413e-09	5.27441e-08	-	K13424|1|2e-17|88.6|zma:100281160|WRKY transcription factor 33	-	GO:0001071//nucleic acid binding transcription factor activity;GO:0043565//sequence-specific DNA binding;GO:0001071//nucleic acid binding transcription factor activity;GO:0043565//sequence-specific DNA binding	GO:0009267//cellular response to starvation;GO:0009743//response to carbohydrate stimulus;GO:0006355//regulation of transcription, DNA-dependent;GO:0009267//cellular response to starvation;GO:0009743//response to carbohydrate stimulus;GO:0006355//regulation of transcription, DNA-dependent	gi|414875543|tpg|DAA52674.1|/3.27062e-148/TPA: putative WRKY DNA-binding domain superfamily protein, partial [Zea mays]
GRMZM2G166944	2001.1	1145.79	673.96	97.25	40.5	-1.26378	Down	4.71642e-75	2.00919e-72	-	K08235|1|3e-150|530|zma:100191584|xyloglucan:xyloglucosyl transferase [EC:2.4.1.207];K14504|2|6e-134|476|sbi:SORBI_10g028580|xyloglucan:xyloglucosyl transferase TCH4 [EC:2.4.1.207]	GO:0005576//extracellular region;GO:0031410//cytoplasmic vesicle;GO:0030312//external encapsulating structure;GO:0005576//extracellular region;GO:0031410//cytoplasmic vesicle;GO:0030312//external encapsulating structure;GO:0005576//extracellular region;GO:0031410//cytoplasmic vesicle;GO:0030312//external encapsulating structure	GO:0016798//hydrolase activity, acting on glycosyl bonds;GO:0016758//transferase activity, transferring hexosyl groups;GO:0016798//hydrolase activity, acting on glycosyl bonds;GO:0016758//transferase activity, transferring hexosyl groups;GO:0016798//hydrolase activity, acting on glycosyl bonds;GO:0016758//transferase activity, transferring hexosyl groups	GO:0044042//glucan metabolic process;GO:0044042//glucan metabolic process;GO:0044042//glucan metabolic process	gi|212275237|ref|NP_001130486.1|/1.04572e-151/xyloglucan endotransglucosylase/hydrolase protein 23 precursor [Zea mays]
GRMZM2G304897	2765	90	53	5.47	2.29	-1.25619	Down	2.9242e-07	5.98727e-06	-	K04733|1|1e-52|206|smo:SELMODRAFT_159261|interleukin-1 receptor-associated kinase 4 [EC:2.7.11.1];K13417|3|4e-48|191|aly:ARALYDRAFT_899604|somatic embryogenesis receptor kinase 4 [EC:2.7.10.1 2.7.11.1];K13418|4|1e-47|190|rcu:RCOM_0186340|somatic embryogenesis receptor kinase 1 [EC:2.7.10.1 2.7.11.1]	-	GO:0004871//signal transducer activity;GO:0030246//carbohydrate binding;GO:0004672//protein kinase activity;GO:0032559	GO:0006464//cellular protein modification process;GO:0008037//cell recognition	gi|414868018|tpg|DAA46575.1|/0/TPA: putative S-locus-like receptor protein kinase family protein [Zea mays]
GRMZM2G413422	2200	272.31	160.48	20.88	8.76	-1.25312	Down	4.38288e-19	3.77934e-17	-	-	-	-	-	gi|226490884|ref|NP_001146725.1|/2.85301e-83/uncharacterized protein LOC100280327 [Zea mays]
GRMZM2G058685	1576	56	33	6.03	2.53	-1.25302	Down	5.30584e-05	0.000629162	-	K09955|1|1e-146|518|zma:100279496|hypothetical protein	GO:0005618//cell wall;GO:0043231//intracellular membrane-bounded organelle;GO:0031410//cytoplasmic vesicle	-	-	gi|195643412|gb|ACG41174.1|/1.4307e-147/hypothetical protein [Zea mays]
GRMZM2G090043	557	240	142	76.44	32.19	-1.24772	Down	7.39184e-17	5.5667e-15	-	-	GO:0031410//cytoplasmic vesicle	-	-	gi|414872632|tpg|DAA51189.1|/4.70278e-33/TPA: hypothetical protein ZEAMMB73_469525 [Zea mays]
GRMZM2G703245	402	74	44	33.55	14.2	-1.24042	Down	4.05004e-06	6.39714e-05	-	-	-	-	-	gi|414589133|tpg|DAA39704.1|/6.78635e-55/TPA: hypothetical protein ZEAMMB73_640009 [Zea mays]
GRMZM5G852378	3531	85	51	4.04	1.72	-1.23195	Down	9.66292e-07	1.76455e-05	-	-	GO:0016020//membrane;GO:0043231//intracellular membrane-bounded organelle	-	GO:0048856//anatomical structure development	gi|413950456|gb|AFW83105.1|/0/hypothetical protein ZEAMMB73_233265 [Zea mays]
GRMZM2G122231	3123	3413.64	2046.61	183.49	78.29	-1.2288	Down	5.07738e-212	6.03827e-209	-	K16055|1|0.0|1491|sbi:SORBI_04g035560|trehalose 6-phosphate synthase/phosphatase [EC:2.4.1.15 3.1.3.12]	GO:0043231//intracellular membrane-bounded organelle	GO:0016757//transferase activity, transferring glycosyl groups;GO:0016787//hydrolase activity	GO:0005991//trehalose metabolic process	gi|413939274|gb|AFW73825.1|/0/trehalose-6-phosphate synthase [Zea mays]
GRMZM2G150404	2305	54.34	32.6	3.97	1.7	-1.2236	Down	7.86152e-05	0.000880626	-	K10999|1|0.0|1109|zma:542624|cellulose synthase A [EC:2.4.1.12]	GO:0031224//intrinsic to membrane	GO:0016759//cellulose synthase activity;GO:0046914//transition metal ion binding	GO:0045229//external encapsulating structure organization;GO:0009250//glucan biosynthetic process	gi|414588935|tpg|DAA39506.1|/0/TPA: cellulose synthase9 [Zea mays]
GRMZM2G340257	1093	68	41	10.68	4.58	-1.22149	Down	1.29586e-05	0.000182469	-	-	-	GO:0016798//hydrolase activity, acting on glycosyl bonds;GO:0043167//ion binding	GO:0044238//primary metabolic process	gi|414873746|tpg|DAA52303.1|/3.42488e-128/TPA: putative endo-1,4-beta-mannosidase family protein [Zea mays]
GRMZM2G115451	1753.43	64.35	41.63	6.64	2.86	-1.21517	Down	6.7439e-05	0.000772099	-	-	-	-	-	gi|226493784|ref|NP_001140463.1|/2.06226e-66/uncharacterized protein LOC100272522 [Zea mays]
GRMZM2G362926	1382	66	40	8.14	3.51	-1.21356	Down	1.90931e-05	0.000257662	-	-	-	-	-	gi|226501728|ref|NP_001141812.1|/1.06994e-95/uncharacterized protein LOC100273951 [Zea mays]
GRMZM2G340578	1887	126.86	77	11.37	4.91	-1.21144	Down	4.58808e-09	1.30301e-07	-	K13754|1|5e-162|569|sbi:SORBI_01g012910|solute carrier family 24 (sodium/potassium/calcium exchanger), member 6	-	-	-	gi|413933550|gb|AFW68101.1|/0/putative sodium/calcium exchanger family protein [Zea mays]
GRMZM2G132286	741	56.82	34.55	13.37	5.79	-1.20736	Down	8.45488e-05	0.000938255	-	-	GO:0043231//intracellular membrane-bounded organelle	GO:0005488//binding	-	gi|413916285|gb|AFW56217.1|/3.11723e-144/hypothetical protein ZEAMMB73_723080 [Zea mays]
GRMZM2G468140	1754	61.42	37.41	5.93	2.57	-1.20626	Down	4.01206e-05	0.000495295	-	-	-	-	-	gi|414587934|tpg|DAA38505.1|/1.726e-72/TPA: hypothetical protein ZEAMMB73_332599 [Zea mays]
GRMZM2G142870	5117	168	103	5.49	2.39	-1.1998	Down	1.50543e-11	6.12951e-10	-	K05666|1|5e-11|67.8|olu:OSTLU_35503|ATP-binding cassette, subfamily C (CFTR/MRP), member 2	-	GO:0017111//nucleoside-triphosphatase activity;GO:0016491//oxidoreductase activity;GO:0000166//nucleotide binding;GO:0003824//catalytic activity	GO:0009987//cellular process;GO:0008152//metabolic process;GO:0006865//amino acid transport;GO:0006865//amino acid transport	gi|413948097|gb|AFW80746.1|/6.77276e-175/hypothetical protein ZEAMMB73_402927 [Zea mays]
GRMZM2G089557	1129	1622	993	246.25	107.29	-1.19861	Down	6.90448e-98	4.19293e-95	-	-	-	-	-	gi|414887377|tpg|DAA63391.1|/2.22249e-77/TPA: zinc finger, C2H2 type family protein [Zea mays]
GRMZM2G017636	1611	73	45	7.69	3.37	-1.19024	Down	9.70596e-06	0.000141413	-	K05283|1|2e-11|69.3|aly:ARALYDRAFT_354960|phosphatidylinositol glycan, class W [EC:2.3.-.-];K11982|2|3e-09|62.0|bdi:100833984|E3 ubiquitin-protein ligase RNF115/126 [EC:6.3.2.19];K15692|3|1e-08|59.7|ppp:PHYPADRAFT_16563|E3 ubiquitin-protein ligase RNF13 [EC:6.3.2.19]	-	GO:0046872//metal ion binding	-	gi|413943009|gb|AFW75658.1|/2.12927e-122/putative RING zinc finger domain superfamily protein [Zea mays]
AC195608.3_FG005	666	125.02	78.1	32.93	14.64	-1.16949	Down	1.06458e-08	2.88833e-07	-	-	-	-	-	gi|293334525|ref|NP_001170140.1|/8.63558e-100/uncharacterized protein LOC100384067 [Zea mays]
GRMZM2G123277	3442	219.34	137.25	10.69	4.76	-1.16723	Down	4.2623e-14	2.3995e-12	-	K16055|1|0.0|1673|sbi:SORBI_03g034640|trehalose 6-phosphate synthase/phosphatase [EC:2.4.1.15 3.1.3.12]	-	-	GO:0005991//trehalose metabolic process	gi|414880522|tpg|DAA57653.1|/0/TPA: putative trehalose phosphatase/synthase family protein [Zea mays]
GRMZM2G131087	687.44	74	48	19.31	8.7	-1.15026	Down	2.33758e-05	0.00030803	-	-	GO:0043231//intracellular membrane-bounded organelle;GO:0043231//intracellular membrane-bounded organelle;GO:0043231//intracellular membrane-bounded organelle;GO:0043231//intracellular membrane-bounded organelle;GO:0043231//intracellular membrane-bounded organelle;GO:0043231//intracellular membrane-bounded organelle	-	-	gi|413926916|gb|AFW66848.1|/8.36818e-57/senescence-associated protein DIN1 isoform 1 [Zea mays]
AC233861.1_FG001	3422	141.56	90.01	6.94	3.14	-1.14417	Down	2.89332e-09	8.496e-08	-	K00924|1|1e-122|439|ath:AT1G28440|[EC:2.7.1.-];K13420|2|2e-121|435|sbi:SORBI_06g028760|LRR receptor-like serine/threonine-protein kinase FLS2 [EC:2.7.11.1]	-	GO:0004672//protein kinase activity;GO:0032559	GO:0006464//cellular protein modification process	gi|414589776|tpg|DAA40347.1|/0/TPA: putative leucine-rich repeat receptor protein kinase family protein [Zea mays]
GRMZM2G365957	3685	225	145	10.23	4.69	-1.12515	Down	1.11713e-13	6.03885e-12	-	K05666|1|2e-115|416|olu:OSTLU_35503|ATP-binding cassette, subfamily C (CFTR/MRP), member 2;K05658|3|1e-31|137|aly:ARALYDRAFT_472995|ATP-binding cassette, subfamily B (MDR/TAP), member 1	GO:0043231//intracellular membrane-bounded organelle;GO:0016020//membrane	GO:0017111//nucleoside-triphosphatase activity;GO:0000166//nucleotide binding	GO:0009987//cellular process;GO:0006810//transport	gi|414588002|tpg|DAA38573.1|/0/TPA: hypothetical protein ZEAMMB73_451732, partial [Zea mays]
GRMZM2G347708	1530	83.78	54.34	9.3	4.3	-1.11289	Down	7.98626e-06	0.000119155	-	K01177|1|6e-59|226|zma:100281767|beta-amylase [EC:3.2.1.2]	GO:0043231//intracellular membrane-bounded organelle;GO:0043231//intracellular membrane-bounded organelle	GO:0043167//ion binding;GO:0016160//amylase activity;GO:0043167//ion binding;GO:0016160//amylase activity	GO:0005976//polysaccharide metabolic process;GO:0005976//polysaccharide metabolic process	gi|414866822|tpg|DAA45379.1|/7.70244e-147/TPA: beta-amylase [Zea mays]
GRMZM2G032619	2444.49	100	65	6.88	3.19	-1.10885	Down	9.2787e-07	1.70201e-05	-	-	-	GO:0004672//protein kinase activity;GO:0004672//protein kinase activity;GO:0004672//protein kinase activity;GO:0004672//protein kinase activity;GO:0032559	GO:0006464//cellular protein modification process	gi|413924671|gb|AFW64603.1|/0/putative protein kinase superfamily protein [Zea mays]
GRMZM2G112488	800	181	118.63	39.31	18.34	-1.0999	Down	4.70742e-11	1.8059e-09	-	-	-	-	GO:0006950//response to stress	gi|414866381|tpg|DAA44938.1|/3.41613e-86/TPA: pathogeneis protein 10 [Zea mays]
GRMZM2G464976	4092.64	203.28	187.4	11.7	5.46	-1.09954	Down	3.21834e-05	0.000409531	-	-	-	GO:0046872//metal ion binding;GO:0046872//metal ion binding;GO:0046872//metal ion binding;GO:0046872//metal ion binding	-	gi|414881329|tpg|DAA58460.1|/0/TPA: hypothetical protein ZEAMMB73_502123 [Zea mays]
GRMZM2G158788	1241	125	82	17.21	8.04	-1.09798	Down	5.5756e-08	1.31956e-06	-	-	-	-	-	gi|212275189|ref|NP_001130233.1|/4.03321e-83/hypothetical protein [Zea mays]
GRMZM2G396553	3369	292	192	14.54	6.8	-1.09642	Down	1.22225e-16	8.87668e-15	-	K01583|1|0.0|1131|sbi:SORBI_10g002070|arginine decarboxylase [EC:4.1.1.19]	-	GO:0016831//carboxy-lyase activity	GO:0006525//arginine metabolic process;GO:0006596//polyamine biosynthetic process	gi|413953361|gb|AFW86010.1|/0/hypothetical protein ZEAMMB73_526584 [Zea mays]
GRMZM2G121700	1353.93	154.42	97.01	18.47	8.69	-1.08776	Down	3.17652e-10	1.07934e-08	-	K05278|1|2e-10|65.1|bdi:100831956|flavonol synthase [EC:1.14.11.23];K04124|2|9e-10|62.8|sbi:SORBI_03g004020|gibberellin 3-beta-dioxygenase [EC:1.14.11.15];K04125|3|8e-09|59.7|sbi:SORBI_09g025470|gibberellin 2-oxidase [EC:1.14.11.13];K00475|4|1e-08|59.3|bdi:100823527|naringenin 3-dioxygenase [EC:1.14.11.9]	GO:0044464//cell part;GO:0044464//cell part;GO:0044464//cell part;GO:0044464//cell part	GO:0016491//oxidoreductase activity;GO:0003824//catalytic activity;GO:0016491//oxidoreductase activity;GO:0003824//catalytic activity	GO:0008152//metabolic process;GO:0008152//metabolic process	gi|226533148|ref|NP_001140318.1|/3.78913e-155/uncharacterized protein LOC100272363 [Zea mays]
GRMZM2G132663	2316	102.05	67.99	7.43	3.52	-1.07779	Down	9.58728e-07	1.75186e-05	-	-	-	-	-	gi|226502458|ref|NP_001148111.1|/0/transposon protein CACTA, En/Spm sub-class [Zea mays]
GRMZM2G404599	504	93	62	32.97	15.65	-1.07499	Down	4.146e-06	6.53785e-05	-	-	-	-	-	gi|413953348|gb|AFW85997.1|/2.78176e-25/hypothetical protein ZEAMMB73_520839 [Zea mays]
GRMZM2G475380	1110	156.99	104.98	24.26	11.54	-1.07194	Down	2.4858e-09	7.42152e-08	-	K06892|1|1e-101|367|pop:POPTR_550478|;K05278|3|2e-49|194|pop:POPTR_828087|flavonol synthase [EC:1.14.11.23]	-	GO:0003824//catalytic activity	GO:0008152//metabolic process	gi|414864457|tpg|DAA43014.1|/0/TPA: hypothetical protein ZEAMMB73_562821 [Zea mays]
GRMZM2G452142	3812	137	92	6.02	2.88	-1.06369	Down	2.97932e-08	7.4332e-07	-	K13415|1|7e-140|497|pop:POPTR_562744|protein brassinosteroid insensitive 1 [EC:2.7.10.1 2.7.11.1]	GO:0031410//cytoplasmic vesicle	GO:0004672//protein kinase activity;GO:0032559	GO:0006464//cellular protein modification process	gi|414584843|tpg|DAA35414.1|/0/TPA: putative phytosulfokine receptor (LRR repeat-containing protein kinase) family protein [Zea mays]
GRMZM2G085260	1510	86	58	9.68	4.65	-1.05778	Down	1.23805e-05	0.000175455	-	-	GO:0031410//cytoplasmic vesicle;GO:0031410//cytoplasmic vesicle	-	-	gi|226495167|ref|NP_001149373.1|/7.34329e-170/desiccation-related protein PCC13-62 precursor [Zea mays]
GRMZM2G024331	1921	108	73	9.51	4.57	-1.05725	Down	1.03173e-06	1.87088e-05	-	K10717|1|1e-83|309|bdi:100829850|cytokinin trans-hydroxylase	GO:0031410//cytoplasmic vesicle	GO:0016491//oxidoreductase activity;GO:0005506//iron ion binding	GO:0008152//metabolic process	gi|413923990|gb|AFW63922.1|/0/putative cytochrome P450 superfamily protein [Zea mays]
GRMZM2G069694	1226.7	100.2	68.2	14.06	6.76	-1.0565	Down	3.02324e-06	4.93364e-05	-	-	-	-	-	gi|224029171|gb|ACN33661.1|/1.43933e-114/unknown [Zea mays]
GRMZM5G869530	1270	78.27	52.99	10.52	5.07	-1.05308	Down	2.48164e-05	0.000325211	-	-	-	-	-	gi|414884722|tpg|DAA60736.1|/3.39056e-22/TPA: hypothetical protein ZEAMMB73_443807, partial [Zea mays]
GRMZM2G320373	828	115	78	24.09	11.63	-1.05058	Down	5.12338e-07	9.90728e-06	-	-	GO:0031410//cytoplasmic vesicle	GO:0005488//binding	GO:0010876//lipid localization	gi|226503631|ref|NP_001152727.1|/5.81406e-36/nonspecific lipid-transfer protein AKCS9 precursor [Zea mays]
GRMZM2G064442	1138	400.85	272.02	60.36	29.15	-1.0501	Down	9.93604e-21	9.91589e-19	-	K16055|1|6e-41|111|zma:100281927|trehalose 6-phosphate synthase/phosphatase [EC:2.4.1.15 3.1.3.12]	GO:0043231//intracellular membrane-bounded organelle	-	GO:0008152//metabolic process	gi|413939274|gb|AFW73825.1|/7.39372e-40/trehalose-6-phosphate synthase [Zea mays]
GRMZM2G030465	853.36	83	57	17.03	8.24	-1.04736	Down	2.59724e-05	0.000338495	-	K14484|1|6e-10|62.8|aly:ARALYDRAFT_470436|auxin-responsive protein IAA	-	-	-	gi|413939371|gb|AFW73922.1|/7.70518e-66/IAA9-auxin-responsive Aux/IAA family member [Zea mays]
GRMZM2G161335	1811	208.22	142.14	19.47	9.46	-1.04134	Down	2.04476e-11	8.20837e-10	bx9	K13228|1|0.0|843|zma:100274317|UDP-glucosyltransferase BX9 [EC:2.4.1.202];K13227|2|5e-154|542|zma:100277344|UDP-glucosyltransferase BX8 [EC:2.4.1.202];K13493|4|2e-71|268|ath:AT5G05860|cytokinin-N-glucosyltransferase [EC:2.4.1.-]	-	GO:0016757//transferase activity, transferring glycosyl groups	-	gi|226505740|ref|NP_001142152.1|/0/DIMBOA UDP-glucosyltransferase BX9 [Zea mays]
GRMZM2G077069	1553	109	75	11.92	5.84	-1.02934	Down	1.51709e-06	2.65486e-05	-	-	-	-	-	gi|413919214|gb|AFW59146.1|/4.64494e-159/hypothetical protein ZEAMMB73_135212 [Zea mays]
GRMZM2G025959	1512	464.38	330.37	53.6	26.43	-1.02006	Down	1.51081e-21	1.61504e-19	-	-	-	-	-	gi|212275039|ref|NP_001130049.1|/1.24922e-169/uncharacterized protein LOC100191141 [Zea mays]
GRMZM2G057086	2340	105	73	7.56	3.74	-1.01535	Down	3.11632e-06	5.06815e-05	-	K00517|1|0.0|910|zma:100193602|[EC:1.14.-.-]	GO:0031410//cytoplasmic vesicle	GO:0016491//oxidoreductase activity;GO:0005506//iron ion binding	GO:0008152//metabolic process	gi|414587391|tpg|DAA37962.1|/0/TPA: putative cytochrome P450 superfamily protein [Zea mays]
GRMZM2G411046	1337	230.82	161	29.44	14.61	-1.01082	Down	7.69322e-12	3.25786e-10	-	K16055|1|5e-17|87.4|zma:100281927|trehalose 6-phosphate synthase/phosphatase [EC:2.4.1.15 3.1.3.12]	GO:0043231//intracellular membrane-bounded organelle	-	-	gi|414585284|tpg|DAA35855.1|/2.639e-160/TPA: hypothetical protein ZEAMMB73_235118 [Zea mays]
GRMZM5G891282	1295	158.37	111.23	20.87	10.43	-1.00069	Down	1.61842e-08	4.26133e-07	-	K01807|1|7e-121|432|sbi:SORBI_08g018730|ribose 5-phosphate isomerase A [EC:5.3.1.6]	GO:0043231//intracellular membrane-bounded organelle	GO:0016861//intramolecular oxidoreductase activity, interconverting aldoses and ketoses	GO:0006098//pentose-phosphate shunt	gi|413924852|gb|AFW64784.1|/5.46817e-139/ribose-5-phosphate isomerase [Zea mays]
